# Supplementary material for: PETRoberta: a novel method for charging station site selection evaluation
Source: PeerJ journal article supplement (doi:10.7717/peerj-cs.3373), 2026-01-26
Supplement: data.zip [file inference.xlsx]

## Sheet: Sheet1
Longitude	Latitude	Traffic Volume	Low-Power Vehicles	POI	address	Station Recommendation Level
113.708	30.3957	74	13	1	Guangkou, Chenggong Modern Urban Agricultural Development Zone, Caidian District, Wuhan City, Hubei Province	5
113.718	30.3867	2	0	1	Lijiatai, Chenggong Modern Urban Agriculture Development Zone, Caidian District, Wuhan City, Hubei Province	3
113.718	30.3957	55	10	0	National Highway 318, Chenggong Modern Urban Agricultural Development Zone, Caidian District, Wuhan City, Hubei Province	4
113.728	30.3957	9	0	1	Group 1, Qunfeng Village, Chenggong Modern Urban Agricultural Development Zone, Caidian District, Wuhan City, Hubei Province	4
113.728	30.4137	1	0	0	National Highway 318, Chenggong Modern Urban Agricultural Development Zone, Caidian District, Wuhan City, Hubei Province	0
113.739	30.3957	4	0	0	Sibaigong Village, Chenggong Modern Urban Agricultural Development Zone, Caidian District, Wuhan City, Hubei Province	0
113.749	30.3598	45	30	0	Village Committee of Wagou Village, Xiaosi Township, Caidian District, Wuhan City, Hubei Province	4
113.749	30.3688	70	17	0	Party Members and Mass Service Center of Xiaosi Township, Caidian District, Wuhan City, Hubei Province	4
113.749	30.4047	4	0	0	Sibaigong Village, Chenggong Modern Urban Agricultural Development Zone, Caidian District, Wuhan City, Hubei Province	0
113.76	30.2251	175	5	0	T-dike, Xiangkou Street, Hannan District, Wuhan City, Hubei Province	4
113.76	30.234	26	0	1	Qiaokou Brigade, Xiangkou Street, Hannan District, Wuhan City, Hubei Province	4
113.76	30.3149	2	2	0	Eighteen Hanyang Dikes in Xiaosi Township, Caidian District, Wuhan City, Hubei Province	1
113.76	30.3239	57	11	0	019 County Road, Xiaosi Township, Caidian District, Wuhan City, Hubei Province	4
113.76	30.3328	163	87	0	019 County Road, Xiaosi Township, Caidian District, Wuhan City, Hubei Province	5
113.76	30.3418	6	4	0	Sanchahe, Xiaosi Township, Caidian District, Wuhan City, Hubei Province	2
113.76	30.3508	1	0	0	Village Committee of Wagou Village, Xiaosi Township, Caidian District, Wuhan City, Hubei Province	0
113.76	30.3598	111	14	0	Party Members and Mass Service Center of Xiaosi Township, Caidian District, Wuhan City, Hubei Province	4
113.76	30.3688	22	3	0	Xihe Breeding Farm in Xiaosi Township, Caidian District, Wuhan City, Hubei Province	2
113.76	30.3777	40	5	0	Xihe Breeding Farm in Xiaosi Township, Caidian District, Wuhan City, Hubei Province	3
113.76	30.4137	6	2	0	Xinbang Primary School, Chenggong Modern Urban Agricultural Development Zone, Caidian District, Wuhan City, Hubei Province	1
113.76	30.4227	24	5	2	G50 Shanghai-Chongqing Expressway, Chenggong Modern Urban Agricultural Development Zone, Caidian District, Wuhan City, Hubei Province	6
113.77	30.234	61	4	2	Qiaokou Brigade, Xiangkou Street, Hannan District, Wuhan City, Hubei Province	6
113.77	30.243	4	0	2	Longqing Road, Xiangkou Street, Hannan District, Wuhan City, Hubei Province	4
113.77	30.2879	10	2	0	006 Township Road, Xiaosi Township, Caidian District, Wuhan City, Hubei Province	2
113.77	30.2969	23	3	0	019 County Road, Xiaosi Township, Caidian District, Wuhan City, Hubei Province	2
113.77	30.3059	25	2	0	019 County Road, Xiaosi Township, Caidian District, Wuhan City, Hubei Province	2
113.77	30.3149	4326	1018	7	Sitong Road, Xiaosi Township, Caidian District, Wuhan City, Hubei Province	7
113.77	30.3239	240	65	4	Sitong Road, Xiaosi Township, Caidian District, Wuhan City, Hubei Province	7
113.77	30.3328	9	3	3	019 County Road, Xiaosi Township, Caidian District, Wuhan City, Hubei Province	6
113.77	30.3418	59	9	0	Xiliuhe, Xiaosi Township, Caidian District, Wuhan City, Hubei Province	4
113.77	30.3508	61	4	0	019 County Road, Xiaosi Township, Caidian District, Wuhan City, Hubei Province	3
113.77	30.3598	115	33	0	Wagou Village, Xiaosi Township, Caidian District, Wuhan City, Hubei Province	5
113.77	30.3777	14	2	0	Xihe Breeding Farm in Xiaosi Township, Caidian District, Wuhan City, Hubei Province	2
113.77	30.3867	2	0	0	Xihe Breeding Farm in Xiaosi Township, Caidian District, Wuhan City, Hubei Province	0
113.77	30.4227	43	4	8	National Highway 318, Chenggong Modern Urban Agricultural Development Zone, Caidian District, Wuhan City, Hubei Province	7
113.77	30.4316	142	39	0	G50 Shanghai-Chongqing Expressway, Chenggong Modern Urban Agricultural Development Zone, Caidian District, Wuhan City, Hubei Province	5
113.781	30.2251	7	0	0	Shuangyi Road, Xiangkou Street, Hannan District, Wuhan City, Hubei Province	0
113.781	30.234	10	4	20	Yinfa Road, Xiangkou Street, Hannan District, Wuhan City, Hubei Province	7
113.781	30.243	113	0	8	Yinxing Road, Xiangkou Street, Hannan District, Wuhan City, Hubei Province	7
113.781	30.252	8	4	0	Longjiatai, Xiaosi Township, Caidian District, Wuhan City, Hubei Province	2
113.781	30.2879	16	3	1	087 Township Road, Xiaosi Township, Caidian District, Wuhan City, Hubei Province	5
113.781	30.2969	1	0	0	Jiazhou, Xiaosi Township, Caidian District, Wuhan City, Hubei Province	0
113.781	30.3059	4	4	0	019 County Road, Xiaosi Township, Caidian District, Wuhan City, Hubei Province	2
113.781	30.3149	109	25	75	Pengzhan Vegetable Professional Cooperative Field Farm, Caidian Township, Caidian District, Wuhan City, Hubei Province	8
113.781	30.3239	199	51	1	Xiaosizheng Street, Xiaosi Township, Caidian District, Wuhan City, Hubei Province	6
113.781	30.3328	12	0	0	019 County Road, Xiaosi Township, Caidian District, Wuhan City, Hubei Province	1
113.781	30.3598	73	6	6	019 County Road, Xiaosi Township, Caidian District, Wuhan City, Hubei Province	7
113.781	30.3688	16	0	0	019 County Road, Xiaosi Township, Caidian District, Wuhan City, Hubei Province	1
113.781	30.3777	4	0	0	Xihe Breeding Farm in Xiaosi Township, Caidian District, Wuhan City, Hubei Province	0
113.781	30.3867	2	0	0	Xihe Breeding Farm in Xiaosi Township, Caidian District, Wuhan City, Hubei Province	0
113.781	30.3957	4	0	0	Chengdu Modern Urban Agricultural Development Zone, Caidian District, Wuhan City, Hubei Province Green Ark Agricultural Products Professional Cooperative	0
113.781	30.4137	2	0	0	Nanqiao, Chenggong Modern Urban Agricultural Development Zone, Caidian District, Wuhan City, Hubei Province	0
113.781	30.4227	3	0	0	Xinbang Village, Chenggong Modern Urban Agricultural Development Zone, Caidian District, Wuhan City, Hubei Province	0
113.781	30.4316	106	24	2	G50 Shanghai-Chongqing Expressway, Zhurushan Street, Caidian District, Wuhan City, Hubei Province	6
113.791	30.2071	163	2	4	Wuhu Avenue, Xiangkou Street, Hannan District, Wuhan City, Hubei Province	6
113.791	30.2161	23	1	0	Erzhigou East Road, Xiangkou Street, Hannan District, Wuhan City, Hubei Province	2
113.791	30.243	16	0	2	Yinlian Lake Irrigation Station, Xiangkou Street, Hannan District, Wuhan City, Hubei Province	5
113.791	30.252	31	0	1	Yinlian Lake Irrigation Station, Xiangkou Street, Hannan District, Wuhan City, Hubei Province	4
113.791	30.261	80	10	3	Wusong Expressway in Xiaosi Township, Caidian District, Wuhan City, Hubei Province	6
113.791	30.27	403	185	5	Wusong Expressway in Xiaosi Township, Caidian District, Wuhan City, Hubei Province	7
113.791	30.2969	2	0	0	019 County Road, Xiaosi Township, Caidian District, Wuhan City, Hubei Province	0
113.791	30.3059	5	0	0	019 County Road, Xiaosi Township, Caidian District, Wuhan City, Hubei Province	0
113.791	30.3149	14	0	0	Wetland Villa in Xiaosi Township, Caidian District, Wuhan City, Hubei Province	1
113.791	30.3239	7	0	1	041 Township Road, Xiaosi Township, Caidian District, Wuhan City, Hubei Province	3
113.791	30.3598	4	0	0	019 County Road, Xiaosi Township, Caidian District, Wuhan City, Hubei Province	0
113.791	30.3688	37	5	0	019 County Road, Xiaosi Township, Caidian District, Wuhan City, Hubei Province	3
113.791	30.3777	73	5	0	019 County Road, Xiaosi Township, Caidian District, Wuhan City, Hubei Province	3
113.791	30.3867	2	0	0	Wuhan Zhouyu Ecological Agriculture Co., Ltd., Zhurushan Street, Caidian District, Wuhan City, Hubei Province	0
113.791	30.3957	8	2	0	Chengdu Modern Urban Agricultural Development Zone, Caidian District, Wuhan City, Hubei Province Daiwan Ecological Agriculture Professional Cooperative	1
113.791	30.4047	15	4	0	Chengdu Modern Urban Agricultural Development Zone, Caidian District, Wuhan City, Hubei Province Green Ark Agricultural Products Professional Cooperative	2
113.791	30.4137	27	0	0	Wuxingkou Village, Chenggong Modern Urban Agricultural Development Zone, Caidian District, Wuhan City, Hubei Province	1
113.791	30.4227	22	4	1	Three-shaped block of Chenggong Modern Urban Agricultural Development Zone, Caidian District, Wuhan City, Hubei Province	5
113.791	30.4316	35	9	0	G50 Shanghai-Chongqing Expressway, Zhurushan Street, Caidian District, Wuhan City, Hubei Province	3
113.791	30.4406	41	12	0	G50 Shanghai-Chongqing Expressway, Zhurushan Street, Caidian District, Wuhan City, Hubei Province	4
113.802	30.2071	60	0	0	052 Township Road, Xiangkou Street, Hannan District, Wuhan City, Hubei Province	2
113.802	30.2161	4	0	0	Erzhigou East Road, Xiangkou Street, Hannan District, Wuhan City, Hubei Province	0
113.802	30.252	13	0	2	County Road 030, Xiangkou Street, Hannan District, Wuhan City, Hubei Province	5
113.802	30.261	12	0	0	County Road 030, Xiangkou Street, Hannan District, Wuhan City, Hubei Province	1
113.802	30.27	2	0	0	019 County Road, Xiaosi Township, Caidian District, Wuhan City, Hubei Province	0
113.802	30.2789	2	0	0	019 County Road, Xiaosi Township, Caidian District, Wuhan City, Hubei Province	0
113.802	30.3239	4	2	1	Yingchun Pavilion in Xiaosi Township, Caidian District, Wuhan City, Hubei Province	4
113.802	30.3328	172	4	0	041 Township Road, Xiaosi Township, Caidian District, Wuhan City, Hubei Province	4
113.802	30.3598	22	2	0	County Road 019, Hongbei Management Committee, Caidian District, Wuhan City, Hubei Province	2
113.802	30.3777	24	1	2	Wuhan Zhouyu Ecological Agriculture Co., Ltd., Xiaosi Township, Caidian District, Wuhan City, Hubei Province	5
113.802	30.3867	51	0	0	County Road 019, Zhurushan Street, Caidian District, Wuhan City, Hubei Province	2
113.802	30.3957	24	0	1	County Road 019, Zhurushan Street, Caidian District, Wuhan City, Hubei Province	4
113.802	30.4047	15	2	3	Chenggong Modern Urban Agriculture Development Zone, Caidian District, Wuhan City, Hubei Province, Shiguang Farm	6
113.802	30.4137	6	0	0	Chenggong Modern Urban Agriculture Development Zone, Caidian District, Wuhan City, Hubei Province, Shiguang Farm	0
113.802	30.4227	8	4	0	Three-shaped wall of Zhurushan Street, Caidian District, Wuhan City, Hubei Province	2
113.802	30.4316	54	11	0	National Highway 318, Zhurushan Street, Caidian District, Wuhan City, Hubei Province	4
113.802	30.4406	140	14	0	Zhurushan Street, Caidian District, Wuhan City, Hubei Province Baisai Village Villagers Committee, Zhurushan Street, Caidian District, Wuhan City	4
113.802	30.4496	73	4	0	Shazui, Zhurushan Street, Caidian District, Wuhan City, Hubei Province	3
113.802	30.4586	20	0	0	Shentang Village, Zhurushan Street, Caidian District, Wuhan City, Hubei Province	1
113.802	30.4676	13	0	0	Shentang Village, Zhurushan Street, Caidian District, Wuhan City, Hubei Province	1
113.802	30.4765	40	16	0	Shangluoshan Street, Caidian District, Wuhan City, Hubei Province	4
113.812	30.2161	12	7	0	Third and Fourth Center Road, Xiangkou Street, Hannan District, Wuhan City, Hubei Province	3
113.812	30.2251	1	0	0	Fourth and fifth center road, Xiangkou Street, Hannan District, Wuhan City, Hubei Province	0
113.812	30.234	4	2	0		1
113.812	30.243	2	2	0	Main channel of Xiangkou Street, Hannan District, Wuhan City, Hubei Province	1
113.812	30.252	8	0	1	County Road 030, Xiangkou Street, Hannan District, Wuhan City, Hubei Province	3
113.812	30.261	19	0	0	Wusong Expressway in Xiaosi Township, Caidian District, Wuhan City, Hubei Province	1
113.812	30.27	10	0	0	019 County Road, Xiaosi Township, Caidian District, Wuhan City, Hubei Province	0
113.812	30.3239	16	2	3	Luohanzhou, Xiaosi Township, Caidian District, Wuhan City, Hubei Province	6
113.812	30.3328	6	2	0	041 Township Road, Xiaosi Township, Caidian District, Wuhan City, Hubei Province	1
113.812	30.3598	5	0	0	Xishanhekou, Hongbei Management Committee, Caidian District, Wuhan City, Hubei Province	0
113.812	30.3688	1	1	0	Xishanhekou, Hongbei Management Committee, Caidian District, Wuhan City, Hubei Province	0
113.812	30.3777	5	1	0	County Road 019, Zhurushan Street, Caidian District, Wuhan City, Hubei Province	1
113.812	30.3867	6	0	3	Minwang Aquaculture Company, Zhurushan Street, Caidian District, Wuhan City, Hubei Province	5
113.812	30.3957	2	0	0	County Road 019, Zhurushan Street, Caidian District, Wuhan City, Hubei Province	0
113.812	30.4047	13	2	4	County Road 019, Zhurushan Street, Caidian District, Wuhan City, Hubei Province	6
113.812	30.4137	19	1	1	Shiguang Farm, Zhurushan Street, Caidian District, Wuhan City, Hubei Province	4
113.812	30.4227	48	3	1	County Road 019, Zhurushan Street, Caidian District, Wuhan City, Hubei Province	5
113.812	30.4316	15	4	0	County Road 019, Zhurushan Street, Caidian District, Wuhan City, Hubei Province	2
113.812	30.4406	738	46	12	G50 Shanghai-Chongqing Expressway, Zhurushan Street, Caidian District, Wuhan City, Hubei Province	7
113.812	30.4496	669	115	3	Liu Family Mausoleum, Zhurushan Street, Caidian District, Wuhan City, Hubei Province	7
113.812	30.4586	33	5	0	Bawuling, Zhurushan Street, Caidian District, Wuhan City, Hubei Province	3
113.812	30.4676	25	2	0	Henglong Primary School, Zhurushan Street, Caidian District, Wuhan City, Hubei Province	2
113.812	30.4765	86	15	0	Hengshan Village, Zhurushan Street, Caidian District, Wuhan City, Hubei Province	4
113.812	30.4855	42	6	0	Baibao Village, Zhurushan Street, Caidian District, Wuhan City, Hubei Province	3
113.823	30.2161	8	0	10	Fourth and fifth center road, Xiangkou Street, Hannan District, Wuhan City, Hubei Province	7
113.823	30.2251	51	8	6	Provincial Road 321, Xiangkou Street, Hannan District, Wuhan City, Hubei Province	7
113.823	30.234	171	1	0	Provincial Road 321, Xiangkou Street, Hannan District, Wuhan City, Hubei Province	3
113.823	30.243	6	6	1	Wuhan Guocheng Breeding Professional Cooperative, Xiangkou Street, Hannan District, Wuhan City, Hubei Province	4
113.823	30.27	31	0	0	019 County Road, Xiaosi Township, Caidian District, Wuhan City, Hubei Province	1
113.823	30.2789	48	13	0	019 County Road, Xiaosi Township, Caidian District, Wuhan City, Hubei Province	4
113.823	30.2879	2	0	0	Zhangjia Dahu, Xiaosi Township, Caidian District, Wuhan City, Hubei Province	0
113.823	30.3328	6	0	0	041 Township Road, Xiaosi Township, Caidian District, Wuhan City, Hubei Province	0
113.823	30.3598	6	0	0	Wanhu Village, Hongbei Management Committee, Caidian District, Wuhan City, Hubei Province	0
113.823	30.3688	12	2	0	Wanhu Village, Hongbei Management Committee, Caidian District, Wuhan City, Hubei Province	2
113.823	30.3777	28	0	0	Wanhu Village Villagers Committee, Hongbei Management Committee, Caidian District, Wuhan City, Hubei Province	1
113.823	30.3867	4	0	0	Honglin Road, Hongbei Management Committee, Caidian District, Wuhan City, Hubei Province	0
113.823	30.4047	4	0	0	County Road 019, Zhurushan Street, Caidian District, Wuhan City, Hubei Province	0
113.823	30.4137	11	6	2	County Road 019, Zhurushan Street, Caidian District, Wuhan City, Hubei Province	5
113.823	30.4227	4	0	0	Baiqu Highway, Zhurushan Street, Caidian District, Wuhan City, Hubei Province	0
113.823	30.4316	18	8	0	Hefeng Village, Zhurushan Street, Caidian District, Wuhan City, Hubei Province	3
113.823	30.4406	737	163	10	Daiwan Village Committee, Zhurushan Street, Caidian District, Wuhan City, Hubei Province	7
113.823	30.4496	509	111	5	Xiangwan, Zhurushan Street, Caidian District, Wuhan City, Hubei Province	7
113.823	30.4586	14	3	0	Jizuo, Zhurushan Street, Caidian District, Wuhan City, Hubei Province	2
113.823	30.4676	612	73	5	Kaicuiyuan, Zhurushan Street, Caidian District, Wuhan City, Hubei Province	7
113.823	30.4765	71	7	3	Wuhan Rural E-commerce Comprehensive Service Station, Zhurushan Street, Caidian District, Wuhan City, Hubei Province	6
113.823	30.4855	129	10	0	Liu Yinjia, Zhurushan Street, Caidian District, Wuhan City, Hubei Province	4
113.833	30.2071	1	0	0	Xique Lake Flower Sea, Xiangkou Street, Hannan District, Wuhan City, Hubei Province	0
113.833	30.2161	28	12	4	Xiquehu Farmhouse, Xiangkou Street, Hannan District, Wuhan City, Hubei Province	6
113.833	30.2251	273	0	8	Provincial Road 321, Xiangkou Street, Hannan District, Wuhan City, Hubei Province	7
113.833	30.234	113	4	1	Shijiatai, Xiangkou Street, Hannan District, Wuhan City, Hubei Province	5
113.833	30.243	4	2	0	Duwan 1st Road, Xiangkou Street, Hannan District, Wuhan City, Hubei Province	1
113.833	30.261	4	0	0	Wuhan Asia-African Agricultural Technology Co., Ltd., Xiangkou Street, Hannan District, Wuhan City, Hubei Province	0
113.833	30.27	44	0	3	County Road 030, Xiangkou Street, Hannan District, Wuhan City, Hubei Province	6
113.833	30.2789	3	1	0	019 County Road, Xiaosi Township, Caidian District, Wuhan City, Hubei Province	0
113.833	30.3508	1	0	0	Wuhan Honggeng Ecological Planting Professional Cooperative, Hongbei Management Committee, Caidian District, Wuhan City, Hubei Province	0
113.833	30.3598	26	0	0	Wuhan Honggeng Ecological Planting Professional Cooperative, Hongbei Management Committee, Caidian District, Wuhan City, Hubei Province	1
113.833	30.3777	114	2	0	Xinwan Village, Hongbei Management Committee, Caidian District, Wuhan City, Hubei Province	3
113.833	30.3867	22	0	3	Wanhu Village Villagers Committee, Hongbei Management Committee, Caidian District, Wuhan City, Hubei Province	5
113.833	30.3957	4	0	0	Honglin Road, Hongbei Management Committee, Caidian District, Wuhan City, Hubei Province	0
113.833	30.4137	2	0	0	Wuhan Shengfa Cotton Co., Ltd., Zhurushan Street, Caidian District, Wuhan City, Hubei Province	0
113.833	30.4316	231	80	5	Junshan, Zhurushan Street, Caidian District, Wuhan City, Hubei Province	7
113.833	30.4406	714	102	12	Zhufruit Street Mineral Resource Management Center, Zhufruit Mountain Street, Caidian District, Wuhan City, Hubei Province	7
113.833	30.4496	5405	62	20	Jiangjiawan, Zhurushan Street, Caidian District, Wuhan City, Hubei Province	8
113.833	30.4586	174	29	7	County Road 014, Zhurushan Street, Caidian District, Wuhan City, Hubei Province	7
113.833	30.4676	77	1	17	Henglong Middle School, Zhurushan Street, Caidian District, Wuhan City, Hubei Province	7
113.833	30.4765	2	0	7	County Road 014, Zhurushan Street, Caidian District, Wuhan City, Hubei Province	6
113.833	30.4855	69	10	4	Cheng Daiwan, Zhurushan Street, Caidian District, Wuhan City, Hubei Province	7
113.833	30.4945	3	0	0	Qinju, Zhuru Mountain Subdistrict, Caidian District, Wuhan City, Hubei Province	0
113.833	30.5125	33	0	0	Dadengwan, Suohe Subdistrict, Caidian District, Wuhan City, Hubei Province	1
113.843	30.1891	25	5	0	S13 Wuhan Supervisory Expressway, Dengnan Street, Hannan District, Wuhan City, Hubei Province	3
113.843	30.1981	43	12	0	S13 Wuhan Supervisory Expressway, Dengnan Street, Hannan District, Wuhan City, Hubei Province	4
113.843	30.2071	29	7	2	S13, Wuhan Supervisory Expressway, Xiangkou Street, Hannan District, Wuhan City, Hubei Province	6
113.843	30.2161	21	5	2	007 Township Road, Xiangkou Street, Hannan District, Wuhan City, Hubei Province	6
113.843	30.2251	12	5	0	S13, Wuhan Supervisory Expressway, Xiangkou Street, Hannan District, Wuhan City, Hubei Province	2
113.843	30.234	112	22	4	Xindu Brigade of Xiangkou Street, Hannan District, Wuhan City, Hubei Province	7
113.843	30.243	18	5	0	Xindu Brigade of Xiangkou Street, Hannan District, Wuhan City, Hubei Province	3
113.843	30.252	5	3	0	Jiurui Nuclear Technology Industrial Park, Xiangkou Street, Hannan District, Wuhan City, Hubei Province	1
113.843	30.261	309	11	2	No. 3, Chenxi Road, Xiangkou Street, Hannan District, Wuhan City, Hubei Province	6
113.843	30.27	51	3	10	No. 31, Yandi Road, Xiangkou Street, Hannan District, Wuhan City, Hubei Province	7
113.843	30.2789	5	4	0	019 County Road, Xiaosi Township, Caidian District, Wuhan City, Hubei Province	2
113.843	30.2879	7	2	0	019 County Road, Xiaosi Township, Caidian District, Wuhan City, Hubei Province	1
113.843	30.3508	2	0	2	Wuhan Honggeng Ecological Planting Professional Cooperative, Hongbei Management Committee, Caidian District, Wuhan City, Hubei Province	4
113.843	30.3598	6	2	0	Wuhan Honggeng Ecological Planting Professional Cooperative, Hongbei Management Committee, Caidian District, Wuhan City, Hubei Province	1
113.843	30.3777	8	0	1	Qianhong Road, Hongbei Management Committee, Caidian District, Wuhan City, Hubei Province	3
113.843	30.3867	3	0	4	Qinjiapo Farm, Hongbei Management Committee, Caidian District, Wuhan City, Hubei Province	5
113.843	30.3957	12	4	2	Honglin Road, Zhurushan Street, Caidian District, Wuhan City, Hubei Province	5
113.843	30.4047	8	0	2	Multifunctional Cultural Plaza, Laohe Village, Zhurushan Street, Caidian District, Wuhan City, Hubei Province	5
113.843	30.4137	4	2	1	Wuhan Shengfa Cotton Co., Ltd., Hongbei Management Committee, Caidian District, Wuhan City, Hubei Province	4
113.843	30.4316	43	6	7	Wuhan Elite School, Zhurushan Street, Caidian District, Wuhan City, Hubei Province	7
113.843	30.4406	12383	1240	324	No. 321, Caihu Street, Zhurushan Street, Caidian District, Wuhan City, Hubei Province	8
113.843	30.4496	387	40	9	Zhurushan Street, Caidian District, Wuhan City, Hubei Province	7
113.843	30.4586	53	16	1	Huangjinshan, Zhurushan Street, Caidian District, Wuhan City, Hubei Province	5
113.843	30.4676	29	0	2	Cai Siling, Zhurushan Street, Caidian District, Wuhan City, Hubei Province	5
113.843	30.4765	33	4	0	Majiatai, Zhurushan Street, Caidian District, Wuhan City, Hubei Province	3
113.843	30.4855	2	0	2	County Road 014, Zhurushan Street, Caidian District, Wuhan City, Hubei Province	4
113.843	30.4945	425	54	2	Wangjiazui, Suohe Street, Caidian District, Wuhan City, Hubei Province	7
113.843	30.5035	465	54	3	Songling Village, Suohe Street, Caidian District, Wuhan City, Hubei Province	7
113.843	30.5125	764	39	2		7
113.854	30.1891	6	0	0	S13 Wuhan Supervisory Expressway, Dengnan Street, Hannan District, Wuhan City, Hubei Province	0
113.854	30.1981	7	0	0	S13 Wuhan Supervisory Expressway, Dengnan Street, Hannan District, Wuhan City, Hubei Province	0
113.854	30.2071	4	0	0	007 Township Road, Xiangkou Street, Hannan District, Wuhan City, Hubei Province	0
113.854	30.2161	46	8	0	Provincial Road 103, Dengnan Street, Hannan District, Wuhan City, Hubei Province	3
113.854	30.2251	88	6	2	Tomb of Xingou Village, Xiangkou Street, Hannan District, Wuhan City, Hubei Province	6
113.854	30.234	5	0	2	S13 Wuhan Supervisory Expressway, Dengnan Street, Hannan District, Wuhan City, Hubei Province	4
113.854	30.243	16	4	4	Provincial Road 321, Xiangkou Street, Hannan District, Wuhan City, Hubei Province	6
113.854	30.252	69	18	6	Village Committee of Xiangkou Brigade, Xiangkou Street, Hannan District, Wuhan City, Hubei Province	7
113.854	30.261	8935	280	119	Yandi Road, Xiangkou Street, Hannan District, Wuhan City, Hubei Province	8
113.854	30.27	207	62	10	Yandi Road, Xiaosi Township, Caidian District, Wuhan City, Hubei Province	7
113.854	30.2789	19	18	0	085 Township Road, Xiaosi Township, Caidian District, Wuhan City, Hubei Province	4
113.854	30.2879	8	8	0	019 County Road, Xiaosi Township, Caidian District, Wuhan City, Hubei Province	3
113.854	30.2969	4	0	0	Qihao Bird Watching Station in Chenhu Wetland, Xiaosi Township, Caidian District, Wuhan City, Hubei Province	0
113.854	30.3239	2	2	1	Important wetland of China, Hubei Shenhu International, Caidian District, Wuhan City, Hubei Province	4
113.854	30.3508	4	0	0	Wuhan Honggeng Ecological Planting Professional Cooperative, Hongbei Management Committee, Caidian District, Wuhan City, Hubei Province	0
113.854	30.3598	16	2	1	Wuhan Honggeng Ecological Planting Professional Cooperative, Hongbei Management Committee, Caidian District, Wuhan City, Hubei Province	4
113.854	30.3688	4	4	2	Hongbei Donggan Village, Hongbei Management Committee, Caidian District, Wuhan City, Hubei Province (Bus Station)	5
113.854	30.3777	55	17	3	Qianhong Road, Hongbei Management Committee, Caidian District, Wuhan City, Hubei Province	6
113.854	30.3867	549	29	34	Agricultural Machinery Road, Hongbei Management Committee, Caidian District, Wuhan City, Hubei Province	8
113.854	30.3957	1391	82	5	Wuhan Jinxi Vegetable Professional Cooperative, Zhurushan Street, Caidian District, Wuhan City, Hubei Province	7
113.854	30.4047	793	1	1	Flower and Seedling Garden, Laohe Village, Zhurushan Street, Caidian District, Wuhan City, Hubei Province	5
113.854	30.4137	842	1	3	Flower and Seedling Garden, Laohe Village, Zhurushan Street, Caidian District, Wuhan City, Hubei Province	6
113.854	30.4227	480	6	0	Qianhong Road, Zhurushan Street, Caidian District, Wuhan City, Hubei Province	4
113.854	30.4316	131	2	0	Confucian Road, Zhurushan Street, Caidian District, Wuhan City, Hubei Province	3
113.854	30.4406	197	48	38	National Highway 318, Zhurushan Street, Caidian District, Wuhan City, Hubei Province	8
113.854	30.4496	170	39	0	National Highway 318, Zhurushan Street, Caidian District, Wuhan City, Hubei Province	5
113.854	30.4586	151	35	4	Zhangwan, Zhurushan Street, Caidian District, Wuhan City, Hubei Province	7
113.854	30.4676	2	0	1	Sanhebao, Zhurushan Street, Caidian District, Wuhan City, Hubei Province	3
113.854	30.4855	35	0	0		1
113.854	30.4945	126	40	5		7
113.854	30.5035	3540	108	70		8
113.854	30.5125	3985	14	7	Shishan Primary School, Suohe Street, Caidian District, Wuhan City, Hubei Province	7
113.854	30.5215	207	14	2	Hubei Chalin Xiaoshu Grain and Oil Co., Ltd., Suohe Street, Caidian District, Wuhan City, Hubei Province	6
113.864	30.2071	14	0	0	007 Township Road, Dengnan Street, Hannan District, Wuhan City, Hubei Province	1
113.864	30.2161	14	3	2	007 Township Road, Dengnan Street, Hannan District, Wuhan City, Hubei Province	5
113.864	30.2251	41	8	10	Dabeinong (Wuhan) Science and Technology Park, Hongxing Road, Dengnan Street, Hannan District, Wuhan City, Hubei Province	7
113.864	30.234	370	17	1	Provincial Road 103, Dengnan Street, Hannan District, Wuhan City, Hubei Province	6
113.864	30.243	40	10	2	Provincial Road 103, Dengnan Street, Hannan District, Wuhan City, Hubei Province	6
113.864	30.252	95	18	10	Provincial Road 321, Dengnan Street, Hannan District, Wuhan City, Hubei Province	7
113.864	30.261	80	9	4	S13 Wuhan Supervisory Expressway, Dengnan Street, Hannan District, Wuhan City, Hubei Province	7
113.864	30.2789	14	2	0	085 Township Road, Xiaosi Township, Caidian District, Wuhan City, Hubei Province	2
113.864	30.2879	2	0	0	085 Township Road, Xiaosi Township, Caidian District, Wuhan City, Hubei Province	0
113.864	30.2969	62	0	0	085 Township Road, Xiaosi Township, Caidian District, Wuhan City, Hubei Province	2
113.864	30.3059	5	0	0	Qihao Protection Station of Chenhu Wetland, Xiaosi Township, Caidian District, Wuhan City, Hubei Province	0
113.864	30.3598	8	0	0	Huangsihe, Hongbei Management Committee, Caidian District, Wuhan City, Hubei Province	0
113.864	30.3688	4	4	1	Qianhong Road, Hongbei Management Committee, Caidian District, Wuhan City, Hubei Province	4
113.864	30.3777	6	0	0	Party Members and Mass Service Center, Hongbei Management Committee, Caidian District, Wuhan City, Hubei Province	0
113.864	30.3867	58	1	3	Honglin Road, Hongbei Management Committee, Caidian District, Wuhan City, Hubei Province	6
113.864	30.4047	2	0	1	Qianhong Road, Zhurushan Street, Caidian District, Wuhan City, Hubei Province	3
113.864	30.4227	8	0	0	079 Township Road, Zhurushan Street, Caidian District, Wuhan City, Hubei Province	0
113.864	30.4406	14	0	10	Zhufruishan Agricultural Products Stock Center, Zhufruishan Street, Caidian District, Wuhan City, Hubei Province	7
113.864	30.4496	251	45	2	Zhurushan Street, Caidian District, Wuhan City, Hubei Province Wuhan City Zhurushan Food Co., Ltd.	7
113.864	30.4586	83	12	2	Wufangzui, Zhurushan Street, Caidian District, Wuhan City, Hubei Province	6
113.864	30.4676	19	0	0	Xujiazui, Zhurushan Street, Caidian District, Wuhan City, Hubei Province	1
113.864	30.4855	20	2	4	Wuhan Caidian District Civilized Labor Protection Products Weaving Factory, Suohe Street, Caidian District, Wuhan City, Hubei Province	6
113.864	30.4945	267	16	1	Xiayanwan, Suohe Street, Caidian District, Wuhan City, Hubei Province	6
113.864	30.5035	459	28	11	Longjingyuan Community, Daolongnishan Village, County 014, Caidian District, Wuhan City, Hubei Province	7
113.864	30.5125	5	1	1	Shishanbao Longjing Mountain Village, Suohe Street, Caidian District, Wuhan City, Hubei Province	4
113.864	30.5215	2	2	0	Fangwan, Suohe Street, Caidian District, Wuhan City, Hubei Province	1
113.875	30.2251	11	10	0	Hubei Xiangda Aquatic Products Technology Co., Ltd., Dengnan Street, Hannan District, Wuhan City, Hubei Province	3
113.875	30.234	304	25	2	Zhangjialing Road, Dengnan Street, Hannan District, Wuhan City, Hubei Province	6
113.875	30.243	232	63	10	Dongwan Road, Dengnan Street, Hannan District, Wuhan City, Hubei Province	7
113.875	30.252	45	12	2	Shuihong Primary School, Hongkang Road, Dengnan Street, Hannan District, Wuhan City, Hubei Province	6
113.875	30.261	23	5	3	S13 Wuhan Supervisory Expressway, Dengnan Street, Hannan District, Wuhan City, Hubei Province	6
113.875	30.27	71	10	0	S13 Wuhan Supervisory Expressway, Dengnan Street, Hannan District, Wuhan City, Hubei Province	4
113.875	30.2789	22	3	0	Wuhao, Xiaosi Township, Caidian District, Wuhan City, Hubei Province	2
113.875	30.2879	2	0	0	085 Township Road, Xiaosi Township, Caidian District, Wuhan City, Hubei Province	0
113.875	30.2969	2	0	1	085 Township Road, Xiaosi Township, Caidian District, Wuhan City, Hubei Province	3
113.875	30.3059	30	0	0	085 Township Road, Xiaosi Township, Caidian District, Wuhan City, Hubei Province	1
113.875	30.3149	15	2	0	Ground parking lot (entry and exit) in Xiaosi Township, Caidian District, Wuhan City, Hubei Province	2
113.875	30.3508	1	0	0	Huangsi River in Xiaosi Township, Caidian District, Wuhan City, Hubei Province	0
113.875	30.3598	22	0	0	Huangsihe, Hongbei Management Committee, Caidian District, Wuhan City, Hubei Province	1
113.875	30.3777	6	0	0	Shiyuhu Village, Hongbei Management Committee, Caidian District, Wuhan City, Hubei Province	0
113.875	30.3957	24	2	0	Guangming Village, Yong'an Street, Caidian District, Wuhan City, Hubei Province	2
113.875	30.4047	2	0	0	Corn and Vegetable Base of Huafeng Agricultural Products Professional Cooperative, Zhurushan Street, Caidian District, Wuhan City, Hubei Province	0
113.875	30.4137	6	4	1	Dwarf Forest Farm, Yong'an Street, Caidian District, Wuhan City, Hubei Province	4
113.875	30.4316	12	2	0	079 Township Road, Zhurushan Street, Caidian District, Wuhan City, Hubei Province	2
113.875	30.4406	11	2	1	National Highway 318, Zhurushan Street, Caidian District, Wuhan City, Hubei Province	4
113.875	30.4496	210	32	9	G50 Shanghai-Chongqing Expressway, Zhurushan Street, Caidian District, Wuhan City, Hubei Province	7
113.875	30.4586	25	7	0	G50 Shanghai-Chongqing Expressway, Zhurushan Street, Caidian District, Wuhan City, Hubei Province	3
113.875	30.4676	8	3	0	Jintangtai, Zhurushan Street, Caidian District, Wuhan City, Hubei Province	2
113.875	30.4765	9	6	0	S15 Hancai Expressway, Yong'an Street, Caidian District, Wuhan City, Hubei Province	2
113.875	30.4855	4	2	1	Zhangjiazui, Suohe Street, Caidian District, Wuhan City, Hubei Province	4
113.875	30.4945	27	4	2	Wenwan, Suohe Street, Caidian District, Wuhan City, Hubei Province	6
113.875	30.5035	317	18	7	Xiaofanwan, Suohe Street, Caidian District, Wuhan City, Hubei Province	7
113.875	30.5125	59	4	1	Xiaofanwan Songyang Forest Park, Suohe Street, Caidian District, Wuhan City, Hubei Province	5
113.885	30.234	4	0	0	Zhujialing Road, Dengnan Street, Hannan District, Wuhan City, Hubei Province	0
113.885	30.252	2	0	0	Shuisanwu Group Road, Dengnan Street, Hannan District, Wuhan City, Hubei Province	0
113.885	30.261	1	0	1	Xiaogao Road, Dengnan Street, Hannan District, Wuhan City, Hubei Province	3
113.885	30.27	81	2	3	Provincial Road 103, Dengnan Street, Hannan District, Wuhan City, Hubei Province	6
113.885	30.2789	1118	297	13	Kunlun Haoke, Xiangkou Parking District, Dengnan Street, Hannan District, Wuhan City, Hubei Province	8
113.885	30.2879	68	9	0	S13 Wuhan Supervisory Expressway, Dengnan Street, Hannan District, Wuhan City, Hubei Province	4
113.885	30.2969	5	0	0	Sanhelian, Dengnan Street, Hannan District, Wuhan City, Hubei Province	0
113.885	30.3059	46	0	1	085 Township Road, Xiaosi Township, Caidian District, Wuhan City, Hubei Province	4
113.885	30.3149	75	4	0	085 Township Road, Xiaosi Township, Caidian District, Wuhan City, Hubei Province	3
113.885	30.3239	14	2	0	Ecological parking lot of Chenhu International Important Wetland in Xiaosi Township, Caidian District, Wuhan City, Hubei Province	2
113.885	30.3418	2	2	0	Tanzi Lake, Xiaosi Township, Caidian District, Wuhan City, Hubei Province	1
113.885	30.3598	8	2	0	Shiyu Lake, Yong'an Street, Caidian District, Wuhan City, Hubei Province	1
113.885	30.3688	32	0	0	087 Township Road, Yong'an Street, Caidian District, Wuhan City, Hubei Province	1
113.885	30.3777	32	0	0	087 Township Road, Hongbei Management Committee, Caidian District, Wuhan City, Hubei Province	1
113.885	30.3867	14	0	0	Taiping Bridge, Yong'an Street, Caidian District, Wuhan City, Hubei Province	1
113.885	30.3957	4	0	0	Guangming Village, Yong'an Street, Caidian District, Wuhan City, Hubei Province	0
113.885	30.4047	11	0	0	087 Township Road, Yong'an Street, Caidian District, Wuhan City, Hubei Province	0
113.885	30.4137	4	0	0	087 Township Road, Yong'an Street, Caidian District, Wuhan City, Hubei Province	0
113.885	30.4316	54	10	0	Paomashan, Zhurushan Street, Caidian District, Wuhan City, Hubei Province	4
113.885	30.4406	5	0	5	People's Mediation Committee of Junying Village, Zhurushan Street, Caidian District, Wuhan City, Hubei Province	6
113.885	30.4496	33	4	6	G50 Shanghai-Chongqing Expressway, Zhurushan Street, Caidian District, Wuhan City, Hubei Province	7
113.885	30.4586	151	23	0	Tanglinzui, Zhurushan Street, Caidian District, Wuhan City, Hubei Province	5
113.885	30.4676	1	0	0	Zhulinzui, Yong'an Street, Caidian District, Wuhan City, Hubei Province	0
113.885	30.4765	17	17	0	Xinzhuang House, Yong'an Street, Caidian District, Wuhan City, Hubei Province	3
113.885	30.4855	18	16	0	S15 Hancai Expressway, Suohe Street, Caidian District, Wuhan City, Hubei Province	3
113.885	30.4945	295	24	0	County Road 014, Suohe Street, Caidian District, Wuhan City, Hubei Province	5
113.885	30.5035	101	8	5	County Road 014, Suohe Street, Caidian District, Wuhan City, Hubei Province	7
113.885	30.5125	388	26	3	Songyang Forest Park, Soma Road, Suohe Street, Caidian District, Wuhan City, Hubei Province	7
113.885	30.5215	76	8	2	Fenjinling Songyang Forest Park, Suohe Street, Caidian District, Wuhan City, Hubei Province	6
113.885	30.5304	16	4	0	Qunyi Village Committee, Suohe Street, Caidian District, Wuhan City, Hubei Province (SF Express Qunyi Village Authorized Point)	2
113.885	30.5394	18	1	0	Chengjiatai, Suohe Street, Caidian District, Wuhan City, Hubei Province	2
113.885	30.5484	710	42	13	Wuhan Shenghonglei Building Materials Co., Ltd., Suohe Street, Caidian District, Wuhan City, Hubei Province	7
113.885	30.5574	370	31	0	Caoxiaowan, Suohe Street, Caidian District, Wuhan City, Hubei Province	5
113.896	30.27	8	2	3	Provincial Road 103, Dengnan Street, Hannan District, Wuhan City, Hubei Province	6
113.896	30.2789	3	1	2	Primary School Road, Dengnan Street, Hannan District, Wuhan City, Hubei Province	5
113.896	30.2879	175	6	1	S13 Wuhan Supervisory Expressway, Dengnan Street, Hannan District, Wuhan City, Hubei Province	5
113.896	30.2969	182	9	0	Tongshun River, Dengnan Street, Hannan District, Wuhan City, Hubei Province	4
113.896	30.3059	2	2	1	Wuhan Zunqin Aquatic Products Technology Co., Ltd., Dongjing Street, Hannan District, Wuhan City, Hubei Province	4
113.896	30.3149	593	32	3	085 Township Road, Xiaosi Township, Caidian District, Wuhan City, Hubei Province	7
113.896	30.3239	242	0	0	085 Township Road, Xiaosi Township, Caidian District, Wuhan City, Hubei Province	3
113.896	30.3328	16	0	0	085 Township Road, Xiaosi Township, Caidian District, Wuhan City, Hubei Province	1
113.896	30.3598	2	2	0	087 Township Road, Hongbei Management Committee, Caidian District, Wuhan City, Hubei Province	1
113.896	30.3688	55	0	0	087 Township Road, Yong'an Street, Caidian District, Wuhan City, Hubei Province	2
113.896	30.3777	46	8	0	087 Township Road, Hongbei Management Committee, Caidian District, Wuhan City, Hubei Province	3
113.896	30.3867	8	0	3	Yong'an Street Working Committee of the Communist Party of China Caidian District Committee, Yong'an Street, Caidian District, Wuhan City, Hubei Province	5
113.896	30.4137	16	2	0	087 Township Road, Yong'an Street, Caidian District, Wuhan City, Hubei Province	2
113.896	30.4227	2	0	0	079 Township Road, Zhurushan Street, Caidian District, Wuhan City, Hubei Province	0
113.896	30.4316	69	40	0	079 Township Road, Zhurushan Street, Caidian District, Wuhan City, Hubei Province	4
113.896	30.4406	21	4	0	Longjia Lake, Zhurushan Street, Caidian District, Wuhan City, Hubei Province	3
113.896	30.4496	234	19	5	National Highway 318, Zhurushan Street, Caidian District, Wuhan City, Hubei Province	7
113.896	30.4586	331	49	0	G50 Shanghai-Chongqing Expressway, Yong'an Street, Caidian District, Wuhan City, Hubei Province	5
113.896	30.4676	35	4	0	Wayao Tournament, Yong'an Street, Caidian District, Wuhan City, Hubei Province	3
113.896	30.4765	194	10	2	Tongshantou, Yong'an Street, Caidian District, Wuhan City, Hubei Province	6
113.896	30.4855	20	2	0	Shen Jiazhou, Yong'an Street, Caidian District, Wuhan City, Hubei Province	2
113.896	30.4945	14	0	0	S15 Hancai Expressway, Suohe Street, Caidian District, Wuhan City, Hubei Province	1
113.896	30.5035	30	11	1	Vanilla flower field (bus stop) Vanilla flower field, Songyang Road, Suohe Street, Caidian District, Wuhan City, Hubei Province	5
113.896	30.5125	354	71	13	No. 160 Songyang Avenue, Suohe Street, Caidian District, Wuhan City, Hubei Province	7
113.896	30.5215	1373	211	0	Songyang Road, Suohe Street, Caidian District, Wuhan City, Hubei Province	6
113.896	30.5304	366	93	2	Songyang Forest Park, Suohe Middle School, Caidian District, Wuhan City, Hubei Province	7
113.896	30.5394	259	109	7	Liji Street, Suohe Street, Caidian District, Wuhan City, Hubei Province	7
113.896	30.5484	68	6	13	Provincial Road 105, Suohe Street, Caidian District, Wuhan City, Hubei Province	7
113.896	30.5574	48	15	0	Zhujiazui, Suohe Street, Caidian District, Wuhan City, Hubei Province	4
113.896	30.5664	20	4	0	G4223 Wuyu Expressway, Suohe Street, Caidian District, Wuhan City, Hubei Province	3
113.906	30.2789	4	2	0	Mianhua Road, Dengnan Street, Hannan District, Wuhan City, Hubei Province	1
113.906	30.2879	6	0	1	Mianhua Road, Dengnan Street, Hannan District, Wuhan City, Hubei Province	3
113.906	30.2969	173	11	0	S13 Wuhan Supervisory Expressway, Dengnan Street, Hannan District, Wuhan City, Hubei Province	4
113.906	30.3059	85	4	0	Shui Road, Dongjing Street, Hannan District, Wuhan City, Hubei Province	3
113.906	30.3239	18	0	1	Villagers Committee of Yangzhuang Village, Xiaosi Township, Caidian District, Hannan District, Wuhan City, Hubei Province	4
113.906	30.3328	39	3	0	Jishuizhu in Xiaosi Township, Caidian District, Wuhan City, Hubei Province	3
113.906	30.3418	79	2	0	014 Township Road, Dongjing Street, Hannan District, Wuhan City, Hubei Province	3
113.906	30.3508	6	0	0	Jingdi Lane, Xiaosi Township, Caidian District, Wuhan City, Hubei Province	0
113.906	30.3688	16	0	0	Huangsihe, Hongbei Management Committee, Caidian District, Wuhan City, Hubei Province	1
113.906	30.3777	10	4	0	087 Township Road, Hongbei Management Committee, Caidian District, Wuhan City, Hubei Province	2
113.906	30.4047	4	4	0	Horse Bow Branch of Hongbei Forest Farm, Yong'an Street, Caidian District, Wuhan City, Hubei Province	2
113.906	30.4137	2	0	0	Xie Jiatai, Yong'an Street, Caidian District, Wuhan City, Hubei Province	0
113.906	30.4227	17	0	0	Shicheng Village, Yong'an Street, Caidian District, Wuhan City, Hubei Province (Bus Station)	1
113.906	30.4316	35	10	0	087 Township Road, Zhurushan Street, Caidian District, Wuhan City, Hubei Province	3
113.906	30.4406	252	19	4	Xintianwan, Zhurushan Street, Caidian District, Wuhan City, Hubei Province	7
113.906	30.4496	55	8	2	Mao Xinji, Zhurushan Street, Caidian District, Wuhan City, Hubei Province	6
113.906	30.4586	175	26	26	Zhangtangling, Yong'an Street, Caidian District, Wuhan City, Hubei Province	7
113.906	30.4676	137	20	6	Food and clothing, Yong'an Street, Caidian District, Wuhan City, Hubei Province	7
113.906	30.4765	88	16	7	Hewan, Yong'an Street, Caidian District, Wuhan City, Hubei Province	7
113.906	30.4855	2	2	4	Weiwan, Yong'an Street, Caidian District, Wuhan City, Hubei Province	6
113.906	30.4945	84	12	0	Xiao Zongzang, Yong'an Street, Caidian District, Wuhan City, Hubei Province	4
113.906	30.5035	171	38	1	Songyang Avenue, Suohe Street, Caidian District, Wuhan City, Hubei Province	6
113.906	30.5125	322	75	6	Suohe Road, Suohe Street, Caidian District, Wuhan City, Hubei Province	7
113.906	30.5215	729	120	49	No. 50, Suohe Road, Suohe Street, Caidian District, Wuhan City, Hubei Province	8
113.906	30.5304	88	7	9	County Road 014, Suohe Street, Caidian District, Wuhan City, Hubei Province	7
113.906	30.5394	128	10	2	G4223 Wuyu Expressway, Suohe Street, Caidian District, Wuhan City, Hubei Province	6
113.906	30.5484	3	1	2	G4223 Wuyu Expressway, Suohe Street, Caidian District, Wuhan City, Hubei Province	5
113.906	30.5574	13	2	3	Yanshan, Suohe Street, Caidian District, Wuhan City, Hubei Province	6
113.906	30.5664	258	16	0	Xiaotingshan, Suohe Street, Caidian District, Wuhan City, Hubei Province	5
113.906	30.7191	39	7	0	Heer Road, Xingou Town, Dongxihu District, Wuhan City, Hubei Province	3
113.917	30.2969	23	2	0		2
113.917	30.3059	138	5	1	S13 Wuhan Supervisory Expressway, Dongjing Street, Hannan District, Wuhan City, Hubei Province	5
113.917	30.3149	50	0	2	014 Township Road, Dongjing Street, Hannan District, Wuhan City, Hubei Province	5
113.917	30.3239	45	0	3	Wuhan Yuhong Mulberry Grape Picking Garden, Dongjing Street, Hannan District, Wuhan City, Hubei Province	6
113.917	30.3328	2	0	0	014 Township Road, Dongjing Street, Hannan District, Wuhan City, Hubei Province	0
113.917	30.3418	3694	112	42	Dongchengwan Central Primary School, Dongjing Street, Hannan District, Wuhan City, Hubei Province	8
113.917	30.3508	463	99	2	Hanjing Street, Dongjing Street, Hannan District, Wuhan City, Hubei Province	7
113.917	30.3688	32	19	0	Xiangxing Street, Tonghu Street, Caidian District, Wuhan City, Hubei Province	4
113.917	30.3777	6	0	0	Xiangxing Street, Tonghu Street, Caidian District, Wuhan City, Hubei Province	0
113.917	30.3867	2	0	0	Xiangxing Street, Hongbei Management Committee, Caidian District, Wuhan City, Hubei Province	0
113.917	30.3957	2	0	0	Magong Branch of Hongbei Forest Farm, Hongbei Management Committee, Caidian District, Wuhan City, Hubei Province	0
113.917	30.4137	48	13	2	Zuowan, Yong'an Street, Caidian District, Wuhan City, Hubei Province	6
113.917	30.4227	37	7	3	Nanhu Port, Yong'an Street, Caidian District, Wuhan City, Hubei Province	6
113.917	30.4316	2	0	0	087 Township Road, Yong'an Street, Caidian District, Wuhan City, Hubei Province	0
113.917	30.4406	12	0	0	Hanwan, Zhurushan Street, Caidian District, Wuhan City, Hubei Province	1
113.917	30.4496	13	0	2	Wujiatai, Zhurushan Street, Caidian District, Wuhan City, Hubei Province	5
113.917	30.4586	552	50	10	Ancestral Hall Bay, Yong'an Street, Caidian District, Wuhan City, Hubei Province	7
113.917	30.4676	204	27	6	G50 Shanghai-Chongqing Expressway, Yong'an Street, Caidian District, Wuhan City, Hubei Province	7
113.917	30.4765	55	4	0	Wuhan Jiuzhen Inn, Yong'an Street, Caidian District, Wuhan City, Hubei Province	3
113.917	30.4945	51	16	5	Wuhan Shuyang Fruit and Vegetable Professional Cooperative, Yuxian Street, Caidian District, Wuhan City, Hubei Province	7
113.917	30.5035	517	36	4	Songyang Avenue, Yong'an Street, Caidian District, Wuhan City, Hubei Province	7
113.917	30.5125	6	0	0	Suozi Changhe, Yuxian Street, Caidian District, Wuhan City, Hubei Province	0
113.917	30.5215	8	3	0	S15 Hancai Expressway, Suohe Street, Caidian District, Wuhan City, Hubei Province	2
113.917	30.5304	279	40	1	G4223 Wuyu Expressway, Suohe Street, Caidian District, Wuhan City, Hubei Province	6
113.917	30.5394	178	8	0	Wankou, Suohe Street, Caidian District, Wuhan City, Hubei Province	4
113.917	30.5484	437	81	0	Yinwan Village Committee, Suohe Street, Caidian District, Wuhan City, Hubei Province	5
113.917	30.5574	226	22	10	Gongdu Primary School, Suohe Street, Caidian District, Wuhan City, Hubei Province	7
113.917	30.5664	14	4	0	Daquwan, Suohe Street, Caidian District, Wuhan City, Hubei Province	2
113.917	30.7101	56	15	0	Hanxing Road, Xingou Town Street, Dongxihu District, Wuhan City, Hubei Province	4
113.917	30.7191	87	17	3	G42 Shanghai-Chengdu Expressway, Xingou Town Street, Dongxihu District, Wuhan City, Hubei Province	6
113.917	30.728	14	1	0	Hanbeidi Road, Xingou Town, Dongxihu District, Wuhan City, Hubei Province	1
113.917	30.737	6	0	0	Guojiawan Ferry, Xin'andu Street, Dongxihu District, Wuhan City, Hubei Province	0
113.917	30.746	9	2	0	Delta Village, Xin'andu Street, Dongxihu District, Wuhan City, Hubei Province	2
113.917	30.755	103	14	0	Delta Village, Xin'andu Street, Dongxihu District, Wuhan City, Hubei Province	4
113.917	30.764	28	4	0	Wuhan Guangming Ecological Demonstration Dairy Farm Co., Ltd., Xin'andu Street, Dongmen District, Wuhan City, Hubei Province (Dongmen)	3
113.927	30.3059	625	70	10	014 Township Road, Dongjing Street, Hannan District, Wuhan City, Hubei Province	7
113.927	30.3149	260	21	1	014 Township Road, Dongjing Street, Hannan District, Wuhan City, Hubei Province	6
113.927	30.3418	96	1	4	County 028, Dongjing Street, Hannan District, Wuhan City, Hubei Province	6
113.927	30.3508	3	0	0	County 028, Dongjing Street, Hannan District, Wuhan City, Hubei Province	0
113.927	30.3598	30	2	0	Qiaotou Village, Tonghu Street, Caidian District, Wuhan City, Hubei Province	2
113.927	30.3688	10	2	0	Xiangxing Street, Tonghu Street, Caidian District, Wuhan City, Hubei Province	2
113.927	30.3777	28	1	0	Xiangxing Street, Tonghu Street, Caidian District, Wuhan City, Hubei Province	2
113.927	30.3867	4	0	2	Xu Shaobo Feed Management Department, Tonghu Street, Caidian District, Wuhan City, Hubei Province	4
113.927	30.3957	8	0	0	Zhuwan, Hongbei Management Committee, Caidian District, Wuhan City, Hubei Province	0
113.927	30.4047	2	0	0	Liwan, Yong'an Street, Caidian District, Wuhan City, Hubei Province	0
113.927	30.4137	23	7	5	Hongzishan, Yong'an Street, Caidian District, Wuhan City, Hubei Province	7
113.927	30.4227	6	2	0	Chongren Lake, Yong'an Street, Caidian District, Wuhan City, Hubei Province	1
113.927	30.4316	44	12	1	Peishan, Yong'an Street, Caidian District, Wuhan City, Hubei Province	5
113.927	30.4406	100	16	4	081 Township Road, Yong'an Street, Caidian District, Wuhan City, Hubei Province	7
113.927	30.4496	1185	398	17	Xujia Laowan, Yong'an Street, Caidian District, Wuhan City, Hubei Province	8
113.927	30.4586	3335	354	10	Xujia Laowan, Yong'an Street, Caidian District, Wuhan City, Hubei Province	8
113.927	30.4676	172	38	1	G50 Shanghai-Chongqing Expressway, Yong'an Street, Caidian District, Wuhan City, Hubei Province	6
113.927	30.4765	13	5	0	Liujiashang, Yong'an Street, Caidian District, Wuhan City, Hubei Province	2
113.927	30.4855	12	6	0	Chen Fuling, Yong'an Street, Caidian District, Wuhan City, Hubei Province	3
113.927	30.4945	108	22	2	Xiaoshan Wujia, Yuxian Street, Caidian District, Wuhan City, Hubei Province	6
113.927	30.5035	535	36	10	Hanma Sports Town, Yuxian Street, Caidian District, Wuhan City, Hubei Province (under construction)	7
113.927	30.5125	25	6	0	Lao Guandu, Yuxian Street, Caidian District, Wuhan City, Hubei Province	3
113.927	30.5215	18	0	0	Lao Guandu, Yuxian Street, Caidian District, Wuhan City, Hubei Province	1
113.927	30.5304	17	4	0	Jiashan, Suohe Street, Caidian District, Wuhan City, Hubei Province	2
113.927	30.5394	64	16	10	County Road 014, Suohe Street, Caidian District, Wuhan City, Hubei Province	7
113.927	30.5484	238	36	2	Muchuanman Life Ecological Park, Suohe Street, Caidian District, Wuhan City, Hubei Province (Turg Brother Demonstration Park)	6
113.927	30.5574	178	33	7	Provincial Road 105, Suohe Street, Caidian District, Wuhan City, Hubei Province	7
113.927	30.5664	11	0	0	Wuhan Xintiancheng Packaging Co., Ltd., Suohe Street, Caidian District, Wuhan City, Hubei Province	0
113.927	30.6382	30	4	0	Liuwutai, Zhangwan Street, Caidian District, Wuhan City, Hubei Province	3
113.927	30.6472	265	37	1	Lianwu Village, Hanjiang Dike, Zhangwan Street, Caidian District, Wuhan City, Hubei Province (Bus Station)	6
113.927	30.7011	574	50	1	Wuhan City, Hubei Province, Xingou Town Street, Dongxihu District, Wuhan City, Hubei Province	6
113.927	30.7101	21	3	0	Hanbeidi Road, Xingou Town, Dongxihu District, Wuhan City, Hubei Province	2
113.927	30.7191	100	22	2	G42 Shanghai-Chengdu Expressway, Xin'andu Street, Dongxihu District, Wuhan City, Hubei Province	6
113.927	30.728	139	53	4	General Branch Committee of the Communist Party of China Sanhe Community, Xin'andu Street, Dongxihu District, Wuhan City, Hubei Province	7
113.927	30.737	544	36	3	Villagers' Committee of Sanhe Community, Xin'andu Street, Dongxihu District, Wuhan City, Hubei Province	7
113.927	30.746	1607	125	62	Building 379, Xin'an Duji Village 1, Xin'an Duji Street, Dong'anhu District, Wuhan City, Hubei Province	8
113.927	30.755	1194	37	4	Building 188, Xin'an Duji Village, Xin'an Duji Village, Dongxihu District, Wuhan City, Hubei Province	7
113.927	30.764	13	1	0	Shuangqiao Village, Xin'andu Street, Dongxihu District, Wuhan City, Hubei Province	1
113.938	30.3059	19	7	8	Wuhan Commodity Trading Center (Jiandao) in Dengnan Street, Hannan District, Wuhan City, Hubei Province	7
113.938	30.3149	182	9	0	Dongjingjiegoubei Community, Shamao Town, Dongjing Street, Hannan District, Wuhan City, Hubei Province	4
113.938	30.3239	1	0	0	Xinhe, Dongjing Street, Hannan District, Wuhan City, Hubei Province	0
113.938	30.3328	32	4	0	004 Township Road, Dongjing Street, Hannan District, Wuhan City, Hubei Province	3
113.938	30.3418	93	31	3	County 028, Dongjing Street, Hannan District, Wuhan City, Hubei Province	7
113.938	30.3598	18	4	0	Wuhan Muyuan Breeding Pig Breeding Co., Ltd., Tonghu Street, Caidian District, Wuhan City, Hubei Province Farm 1, Hannan	2
113.938	30.3688	86	6	3	Hubei Aike Sampling Co., Ltd., Tonghu Street, Caidian District, Wuhan City, Hubei Province	6
113.938	30.3777	473	37	0	Xiangxing Street, Tonghu Street, Caidian District, Wuhan City, Hubei Province Caidian Tonghu Provincial Wetland Park	5
113.938	30.3957	4	0	0	Hubei Caidian Tonghu Provincial Wetland Park, 081 Township Road, Tonghu Street, Caidian District, Wuhan City, Hubei Province	0
113.938	30.4047	16	0	1	Qianjin Cement Prefabricated Parts Factory, Yong'an Street, Caidian District, Wuhan City, Hubei Province	4
113.938	30.4137	125	21	9	Beiqihu, Yong'an Street, Caidian District, Wuhan City, Hubei Province	7
113.938	30.4227	1121	166	2	Zoujiafan, Yong'an Street, Caidian District, Wuhan City, Hubei Province	7
113.938	30.4316	53	20	11	Xiangji Village, Yong'an Street, Caidian District, Wuhan City, Hubei Province	7
113.938	30.4406	31	3	3	081 Township Road, Yong'an Street, Caidian District, Wuhan City, Hubei Province	6
113.938	30.4496	2220	640	23	Anbao Road, Yong'an Street, Caidian District, Wuhan City, Hubei Province	8
113.938	30.4586	5391	1198	338	8 Yong'an Central Primary School, Yong'an Street, Yong'an Street, Caidian District, Wuhan City, Hubei Province	8
113.938	30.4676	233	25	6	Dingwan, Yong'an Village, Yong'an Street, Caidian District, Wuhan City, Hubei Province (Bus Station)	7
113.938	30.4765	155	36	4	Jiuzhen Taoyuan Scenic Area, Luhua Line, Yong'an Street, Caidian District, Wuhan City, Hubei Province	7
113.938	30.4855	233	21	1	Jiuzhen Ankangju, Songyang Line, Yuxian Street, Caidian District, Wuhan City, Hubei Province	6
113.938	30.4945	731	33	6	Songyang Avenue, Yuxian Street, Caidian District, Wuhan City, Hubei Province	7
113.938	30.5035	79	13	2	Songyang Avenue, Yuxian Street, Caidian District, Wuhan City, Hubei Province	6
113.938	30.5125	39	6	1	Lao Guandu, Yuxian Street, Caidian District, Wuhan City, Hubei Province	5
113.938	30.5215	22	0	0	G4223 Wuyu Expressway, Yuxian Street, Caidian District, Wuhan City, Hubei Province	1
113.938	30.5304	8	0	0	S15 Hancai Expressway, Yuxian Street, Caidian District, Wuhan City, Hubei Province	0
113.938	30.5394	40	4	0	S15 Hancai Expressway, Suohe Street, Caidian District, Wuhan City, Hubei Province	3
113.938	30.5484	68	31	5	Jinlong Shuizhai Wooden House Villa Group, Suohe Street, Caidian District, Wuhan City, Hubei Province	7
113.938	30.5574	109	11	11	Provincial Road 105, Zhangwan Street, Caidian District, Wuhan City, Hubei Province	7
113.938	30.5664	728	72	1	Bailianhai Fishing Field, Zhangwan Street, Caidian District, Wuhan City, Hubei Province	6
113.938	30.5753	100	6	1	Wuxiangtangwan, Zhangwan Street, Caidian District, Wuhan City, Hubei Province	5
113.938	30.5843	26	1	0	Sancha River, Zhangwan Street, Caidian District, Wuhan City, Hubei Province	2
113.938	30.6023	37	6	1	County Road 013, Zhangwan Street, Caidian District, Wuhan City, Hubei Province	5
113.938	30.6113	40	2	0	County Road 013, Zhangwan Street, Caidian District, Wuhan City, Hubei Province	3
113.938	30.6203	101	30	3	Xijiang Whole House Customization Factory, Zhangwan Street, Caidian District, Wuhan City, Hubei Province	7
113.938	30.6292	1540	346	4	Tongxin Village (Liuji) (Bus Station) in Hanjiang Dike, Zhangwan Street, Caidian District, Wuhan City, Hubei Province	7
113.938	30.6382	791	113	3	Tongxin Village (Liuji) (Bus Station) in Hanjiang Dike, Zhangwan Street, Caidian District, Wuhan City, Hubei Province	7
113.938	30.6472	6	2	5	Dongjiatai, Zhangwan Street, Caidian District, Wuhan City, Hubei Province	6
113.938	30.6562	65	13	7	Bada Village, Zhangwan Street, Caidian District, Wuhan City, Hubei Province	7
113.938	30.6921	2159	241	1		7
113.938	30.7011	7274	157	5	National Highway 348, Xingou Town Street, Dongxihu District, Wuhan City, Hubei Province	7
113.938	30.7101	22	5	5	Hesha North 3rd Road, Xingou Town Street, Dongxihu District, Wuhan City, Hubei Province	6
113.938	30.7191	75	8	2	G42 Shanghai-Chengdu Expressway, Xin'andu Street, Dongxihu District, Wuhan City, Hubei Province	6
113.938	30.728	6	0	0	Yongfeng Village, Xin'andu Street, Dongxihu District, Wuhan City, Hubei Province	0
113.938	30.737	29	1	30	Wuhan Jianmin Dapeng Pharmaceutical Co., Ltd., Dongken Road, Xin'andu Street, Donghu District, Wuhan City, Hubei Province	7
113.938	30.746	95	7	26	Wuhan Oriental Bode Special Disease Hospital, Xin'andu Street, Dongfanghu District, Wuhan City, Hubei Province	7
113.938	30.755	3	2	0	Hui'an Avenue, Xin'andu Street, Dongxihu District, Wuhan City, Hubei Province	1
113.938	30.764	8	0	1	Hui'an Avenue, Xin'andu Street, Dongxihu District, Wuhan City, Hubei Province	3
113.948	30.3059	51	18	2	Provincial Road 103, Dengnan Street, Hannan District, Wuhan City, Hubei Province	6
113.948	30.3149	94	10	0	S13 Wuhan Supervisory Expressway, Dengnan Street, Hannan District, Wuhan City, Hubei Province	4
113.948	30.3239	17	8	0	004 Township Road, Dongjing Street, Hannan District, Wuhan City, Hubei Province	3
113.948	30.3328	6	2	0	004 Township Road, Dongjing Street, Hannan District, Wuhan City, Hubei Province	1
113.948	30.3418	55	1	1	004 Township Road, Dongjing Street, Hannan District, Wuhan City, Hubei Province	5
113.948	30.3508	4	0	0	004 Township Road, Dongjing Street, Hannan District, Wuhan City, Hubei Province	0
113.948	30.3598	2	0	0	Wuhan Muyuan Breeding Pig Breeding Co., Ltd., Dongjing Street, Hannan District, Wuhan City, Hubei Province Hannan Farm 1	0
113.948	30.3688	233	19	20	Veterans Service Station of Tonghu Office, Tonghu Street, Caidian District, Wuhan City, Hubei Province	7
113.948	30.3777	3735	55	17	Xiangxing Street, Tonghu Street, Caidian District, Wuhan City, Hubei Province	8
113.948	30.3867	69	4	1	Ducang Lake, Tonghu Street, Caidian District, Wuhan City, Hubei Province Caidian Tonghu Provincial Wetland Park	5
113.948	30.3957	48	3	2	Pearl Platform, Tonghu Street, Caidian District, Wuhan City, Hubei Province, Hubei Caidian Tonghu Provincial Wetland Park	6
113.948	30.4047	30	6	1	081 Township Road, Qianshan Street, Caidian District, Wuhan City, Hubei Province	5
113.948	30.4137	11	1	0	Yongtong Highway, Yong'an Street, Caidian District, Wuhan City, Hubei Province	1
113.948	30.4227	690	43	1	Yujiaqi, Yong'an Street, Caidian District, Wuhan City, Hubei Province	6
113.948	30.4316	31	0	2	Caidian Nursery, Yong'an Street, Caidian District, Wuhan City, Hubei Province	5
113.948	30.4406	15	3	2	Xinliu Village, Yong'an Street, Caidian District, Wuhan City, Hubei Province	5
113.948	30.4496	48	6	6	Yongxing Street, Yong'an Street, Caidian District, Wuhan City, Hubei Province	7
113.948	30.4586	2940	441	74	No. 94, Yong'an Street, Caidian District, Wuhan City, Hubei Province	8
113.948	30.4676	208	15	12	Jiuzhen Taoyuan Scenic Area, Yong'an Street, Caidian District, Wuhan City, Hubei Province	7
113.948	30.4765	659	79	9	Wuhan Jiuzhenshan Liyuan B&B, Yong'an Street, Caidian District, Wuhan City, Hubei Province	7
113.948	30.4855	10	0	1	Yangjia Xiaowan, Yuxian Street, Caidian District, Wuhan City, Hubei Province	4
113.948	30.4945	403	17	1	Songyang Avenue, Yuxian Street, Caidian District, Wuhan City, Hubei Province	6
113.948	30.5035	172	27	3	Tieli Village, Songmao Highway, Yuxian Street, Caidian District, Wuhan City, Hubei Province (Bus Station)	7
113.948	30.5125	2107	392	0	Jiangwan, Yuxian Street, Caidian District, Wuhan City, Hubei Province	6
113.948	30.5215	9	5	2	Caidian Xincheng Family Farm, Yuxian Street, Caidian District, Wuhan City, Hubei Province	5
113.948	30.5394	387	146	0	S15 Hancai Expressway, Yuxian Street, Caidian District, Wuhan City, Hubei Province	6
113.948	30.5484	14	0	2	Lion Pavilion, Zhangwan Street, Caidian District, Wuhan City, Hubei Province Wuhan Wildlife Kingdom	5
113.948	30.5574	210	48	12	Wuhan Wildlife Kingdom Parking Lotte, Zhangwan Street, Caidian District, Wuhan City, Hubei Province	7
113.948	30.5664	398	38	11	Wuhan Feili, Zhangwan Street, Caidian District, Wuhan City, Hubei Province	7
113.948	30.5753	862	73	2	Wuxiangtangwan, Zhangwan Street, Caidian District, Wuhan City, Hubei Province	7
113.948	30.5843	10	0	0	Baimashan, Zhangwan Street, Caidian District, Wuhan City, Hubei Province	0
113.948	30.5933	283	93	0	Baimashan, Zhangwan Street, Caidian District, Wuhan City, Hubei Province	5
113.948	30.6023	5	0	2	Shuanglin Village Committee, Zhangwan Street, Caidian District, Wuhan City, Hubei Province	4
113.948	30.6113	4	2	0	Qinchuan Highway, Zhangwan Street, Caidian District, Wuhan City, Hubei Province	1
113.948	30.6203	66	9	0	County Road 013, Zhangwan Street, Caidian District, Wuhan City, Hubei Province	4
113.948	30.6292	374	74	37	Yangjiakou embankment section of Caidian District River Embankment Project, Zhangwan Street, Caidian District, Wuhan City, Hubei Province	8
113.948	30.6382	6	0	0	Wuyi Village, Hanjiangdi, Zhangwan Street, Caidian District, Wuhan City, Hubei Province (Bus Station)	0
113.948	30.6472	6	0	2	Zhoujiatai, Zhangwan Street, Caidian District, Wuhan City, Hubei Province	5
113.948	30.6562	9	0	2	Yinjiatai, Hongxing Village, Zhangwan Street, Caidian District, Wuhan City, Hubei Province	5
113.948	30.6921	1016	201	181	Hekou Road, Cihui Street, Dongxihu District, Wuhan City, Hubei Province	8
113.948	30.7011	2894	191	30	Hesha North 1st Road, Xingou Town, Dongxihu District, Wuhan City, Hubei Province	8
113.948	30.7101	88	20	8	Handan Line, Xingou Town Street, Dongxihu District, Wuhan City, Hubei Province	7
113.948	30.7191	56	18	4	G42 Shanghai-Chengdu Expressway, Xin'andu Street, Dongxihu District, Wuhan City, Hubei Province	7
113.948	30.728	7	0	2	Dongken Road, Xin'andu Street, Dong'anhu District, Wuhan City, Hubei Province	5
113.948	30.737	25	5	4	No. 72, Dongken Road, Xin'andu Street, Dongxihu District, Wuhan City, Hubei Province	6
113.948	30.746	21	0	0	Fumin Cooperative, Xin'andu Street, Dongxihu District, Wuhan City, Hubei Province	1
113.948	30.755	14	6	0	Jihan Road, Xin'andu Street, Dongxihu District, Wuhan City, Hubei Province	3
113.948	30.7729	36	2	1	Hui'an Avenue, Xin'andu Street, Dongxihu District, Wuhan City, Hubei Province	5
113.958	30.3059	34	7	2	Provincial Road 103, Dengnan Street, Hannan District, Wuhan City, Hubei Province	6
113.958	30.3149	160	4	0	004 Township Road, Dengnan Street, Hannan District, Wuhan City, Hubei Province	4
113.958	30.3328	2	2	0	Xiayangjiaoling, Dongjing Street, Hannan District, Wuhan City, Hubei Province	1
113.958	30.3418	26	2	2	Sishihu, Dongjing Street, Hannan District, Wuhan City, Hubei Province	5
113.958	30.3508	39	1	1	004 Township Road, Dongjing Street, Hannan District, Wuhan City, Hubei Province	5
113.958	30.3598	31	4	0	004 Township Road, Dongjing Street, Hannan District, Wuhan City, Hubei Province	3
113.958	30.3688	1	0	1	Xiangzheng Road, Tonghu Street, Caidian District, Wuhan City, Hubei Province Caidian Tonghu Provincial Wetland Park	3
113.958	30.3777	4	0	0	Tonghu Zheng Street, Tonghu Street, Caidian District, Wuhan City, Hubei Province, Hubei Province	0
113.958	30.3867	3	0	1	Hubei Caidian Tonghu Provincial Wetland Park, County Road 016, Tonghu Street, Caidian District, Wuhan City, Hubei Province	3
113.958	30.3957	46	16	2	081 Township Road, Tonghu Street, Caidian District, Wuhan City, Hubei Province	6
113.958	30.4047	51	8	0	County Road 016, Qianshan Street, Caidian District, Wuhan City, Hubei Province	4
113.958	30.4137	1	0	1	Veterans Service Station of Gaoxin Village, Yong'an Street, Caidian District, Caidian District, Wuhan City, Hubei Province	3
113.958	30.4227	183	2	5	Everyday cream strawberry fruit picking garden, Yongtong highway, Yong'an Street, Caidian District, Wuhan City, Hubei Province	7
113.958	30.4316	6	0	0	Yongtong Highway, Yong'an Street, Caidian District, Wuhan City, Hubei Province	0
113.958	30.4406	2	0	0	Yongtong Highway, Yong'an Street, Caidian District, Wuhan City, Hubei Province	0
113.958	30.4496	24	0	2	Changfu Street, Qianshan Street, Caidian District, Wuhan City, Hubei Province	5
113.958	30.4586	417	79	33	G50 Shanghai-Chongqing Expressway, Huangshan Street, Caidian District, Wuhan City, Hubei Province	8
113.958	30.4676	191	32	14	Wuyuetan Jiuzhen Mountain Scenic Area, Yong'an Street, Caidian District, Wuhan City, Hubei Province	7
113.958	30.4765	233	46	8	Xujia Dawan, Yong'an Street, Caidian District, Wuhan City, Hubei Province	7
113.958	30.4855	10	4	8	Wanwan, Yuxian Street, Caidian District, Wuhan City, Hubei Province	7
113.958	30.4945	101	9	9	Yuxian Street, Caidian District, Wuhan City, Hubei Province, Zai Shang Culture Tourism Development Co., Ltd.	7
113.958	30.5035	270	20	3	Maojiazui, Yuxian Street, Caidian District, Wuhan City, Hubei Province	7
113.958	30.5125	58	10	1	Building 18, Country Garden, Yuxian Street, Caidian District, Wuhan City, Hubei Province	5
113.958	30.5215	8	6	0	Yaowan, Yuxian Street, Caidian District, Wuhan City, Hubei Province	2
113.958	30.5394	132	67	15	West Lake Service Area, Yuxian Street, Caidian District, Wuhan City, Hubei Province	7
113.958	30.5484	81	3	4	Dajiangwan, Yuxian Street, Caidian District, Wuhan City, Hubei Province	6
113.958	30.5574	172	26	2	Jijiazui, Zhangwan Street, Caidian District, Wuhan City, Hubei Province	6
113.958	30.5664	68	21	17	Provincial Road 105, Zhangwan Street, Caidian District, Wuhan City, Hubei Province	7
113.958	30.5753	359	54	1	Tengwan, Zhangwan Street, Caidian District, Wuhan City, Hubei Province	6
113.958	30.5843	299	55	0	Huaying Village, Zhangwan Street, Caidian District, Wuhan City, Hubei Province	5
113.958	30.5933	15	0	0	Daqi Shang, Zhangwan Street, Caidian District, Wuhan City, Hubei Province	1
113.958	30.6023	21	0	0	Hubei Yangtze River Fisheries Research Institute, Zhangwan Street, Caidian District, Wuhan City, Hubei Province	1
113.958	30.6113	1303	104	0	Qinchuan Highway, Zhangwan Street, Caidian District, Wuhan City, Hubei Province	6
113.958	30.6203	368	45	6	County Road 013, Zhangwan Street, Caidian District, Wuhan City, Hubei Province	7
113.958	30.6292	370	68	2	Baihu New Village, Bailiu Highway, Zhangwan Street, Caidian District, Wuhan City, Hubei Province (Bus Station)	7
113.958	30.6382	42	8	0	Yangjiakou, Zhangwan Street, Caidian District, Wuhan City, Hubei Province	3
113.958	30.6472	492	102	1	Long Xietai, Zhangwan Street, Caidian District, Wuhan City, Hubei Province	6
113.958	30.6562	121	54	4	The Communist Party of China Restoration Village Branch Committee, Zhangwan Street, Caidian District, Wuhan City, Hubei Province	7
113.958	30.6652	14	4	0	Zhongzhugubang (Wuhan) Building Repair Technology Co., Ltd., Zhangwan Street, Caidian District, Wuhan City, Hubei Province	2
113.958	30.6741	57	2	2	Laoqunli, Hanjiang Dike, Zhangwan Street, Caidian District, Wuhan City, Hubei Province (Bus Station)	6
113.958	30.6921	1187	315	16	Jiangdi Street, Xingou Town, Dongxihu District, Wuhan City, Hubei Province	8
113.958	30.7011	61	18	7	He'an West Road, Xingou Town, Dongxihu District, Wuhan City, Hubei Province	7
113.958	30.7101	149	19	1	Handan Line, Xingou Town Street, Dongxihu District, Wuhan City, Hubei Province	6
113.958	30.7191	57	13	0	G42 Shanghai-Chengdu Expressway, Xingou Town Street, Dongxihu District, Wuhan City, Hubei Province	4
113.958	30.728	8	0	5	No. 106, Dongken Road, Xin'andu Street, Dongxihu District, Wuhan City, Hubei Province	6
113.958	30.737	22	16	8	Zhangxin Road, Xin'andu Street, Dongxihu District, Wuhan City, Hubei Province	7
113.958	30.746	75	4	1	Sanban Port, Xin'andu Street, Dongxihu District, Wuhan City, Hubei Province	5
113.958	30.755	52	8	0	Jihan Road, Xin'andu Street, Dongxihu District, Wuhan City, Hubei Province	4
113.958	30.764	8	0	2	Laohu Strawberry Ecological Picking Garden, Xin'andu Street, Dongxihu District, Wuhan City, Hubei Province	5
113.958	30.7729	64	5	7	Guanjiagou, Xin'andu Street, Dongxihu District, Wuhan City, Hubei Province	7
113.958	30.7819	22	6	0	Renmin Road, Xin'andu Street, Dongxihu District, Wuhan City, Hubei Province, Hubei Province	3
113.969	30.2969	2	0	0	15th Road, Dengnan Street, Hannan District, Wuhan City, Hubei Province	0
113.969	30.3059	52	4	0	Jianxin3rd Road, Dengnan Street, Hannan District, Wuhan City, Hubei Province	3
113.969	30.3149	50	2	2	S13 Wuhan Supervisory Expressway, Dengnan Street, Hannan District, Wuhan City, Hubei Province	6
113.969	30.3239	8	1	0	S13 Wuhan Supervisory Expressway, Dengnan Street, Hannan District, Wuhan City, Hubei Province	1
113.969	30.3328	62	6	1	Zhoujiashan, Dongjing Street, Hannan District, Wuhan City, Hubei Province	5
113.969	30.3418	30	0	0	Zaojiao Mountain, Dongjing Street, Hannan District, Wuhan City, Hubei Province	1
113.969	30.3508	99	2	0	Zhangjialing, Dongjing Street, Hannan District, Wuhan City, Hubei Province	3
113.969	30.3598	49	4	0	Zhangjialing, Dongjing Street, Hannan District, Wuhan City, Hubei Province	3
113.969	30.3688	56	0	0	Mexican Road, Tonghu Street, Caidian District, Wuhan City, Hubei Province, Caidian Tonghu Provincial Wetland Park, Hubei Province	2
113.969	30.3777	12	4	0	Mechanical repair road in Tonghu Street, Caidian District, Wuhan City, Hubei Province	2
113.969	30.3867	24	4	0	Guojiazui, Qianshan Street, Caidian District, Wuhan City, Hubei Province	3
113.969	30.3957	31	13	0	County Road 016, Qianshan Street, Caidian District, Wuhan City, Hubei Province	4
113.969	30.4047	88	11	2		6
113.969	30.4137	18	1	0	Zhiyin Gallery Ecological Park, Yishan Street, Caidian District, Wuhan City, Hubei Province	2
113.969	30.4227	44	2	2	Xinwudun, Yong'an Street, Caidian District, Wuhan City, Hubei Province	5
113.969	30.4316	2	2	0	Building 53, Phase 1, Wuhan Yard, Caidian District, Wuhan City, Hubei Province	1
113.969	30.4406	335	72	2	Auxiliary Road, Changfu Street, Qianshan Street, Caidian District, Wuhan City, Hubei Province	7
113.969	30.4496	222	16	11	Caojiatou, Qianshan Street, Caidian District, Wuhan City, Hubei Province	7
113.969	30.4586	113	19	7	Suzishan Cemetery, Huangshan Street, Caidian District, Wuhan City, Hubei Province	7
113.969	30.4676	176	51	8	Provincial Road 104, Yishan Street, Caidian District, Wuhan City, Hubei Province	7
113.969	30.4765	1087	171	11	Wuhan Fumingjia Building Materials Technology Co., Ltd., Xushan Street, Caidian District, Wuhan City, Hubei Province	7
113.969	30.4855	295	37	6	Juntai Hotel, Yuxian Street, Caidian District, Wuhan City, Hubei Province (Field National Defense Park Store)	7
113.969	30.4945	581	33	6	Liu's House in Weijialing, Yuxian Street, Caidian District, Wuhan City, Hubei Province	7
113.969	30.5035	440	99	5	Zhujia Laowan, Yuxian Street, Caidian District, Wuhan City, Hubei Province	7
113.969	30.5125	91	18	4	Gangling Road, Yuxian Street, Caidian District, Wuhan City, Hubei Province	7
113.969	30.5215	691	43	1	Houfangwan, Yuxian Street, Caidian District, Wuhan City, Hubei Province	6
113.969	30.5304	116	28	24	Jiangjiashantou (bus stop) in Qianjin Village, Yuxian Street, Caidian District, Wuhan City, Hubei Province	7
113.969	30.5394	18	2	9	Yujiatai, Gechiling, Yuxian Street, Caidian District, Wuhan City, Hubei Province (bus station)	7
113.969	30.5484	24	4	12	Zeng Jun, Yuxian Street, Caidian District, Wuhan City, Hubei Province	7
113.969	30.5574	10	2	0	Xiongling Village, Zhangwan Street, Caidian District, Wuhan City, Hubei Province	2
113.969	30.5664	378	88	10	Hubei Xinminghong Technology Co., Ltd., Zhangwan Street, Caidian District, Wuhan City, Hubei Province	7
113.969	30.5753	122	24	15	Wuhan Yuhongda Clothing Co., Ltd., Zhangwan Street, Caidian District, Wuhan City, Hubei Province	7
113.969	30.5843	527	72	3	Xiao Aijiawan, Bailiu Highway, Zhangwan Street, Caidian District, Wuhan City, Hubei Province (Bus Station)	7
113.969	30.5933	74	14	0	Huangtupi Village, Zhangwan Street, Caidian District, Wuhan City, Hubei Province	4
113.969	30.6023	142	29	20	Wuhan Xinberlin Science and Technology Second Examination Center, Zhangwan Street, Caidian District, Wuhan City, Hubei Province	7
113.969	30.6113	68	8	4	Wuhan Demin Special Breeding Co., Ltd., Zhangwan Street, Caidian District, Wuhan City, Hubei Province	7
113.969	30.6203	876	26	9	Wuhan Bennuo Pipe Manufacturing Co., Ltd., 012 County Road, Zhangwan Street, Caidian District, Wuhan City, Hubei Province	7
113.969	30.6382	15	0	5	No. 18, Ganghua Street, Zhangwan Street, Caidian District, Wuhan City, Hubei Province	6
113.969	30.6472	331	36	49	Tianbangcheng Plastic Machinery Factory, Zhangwan Street, Caidian District, Wuhan City, Hubei Province	8
113.969	30.6562	470	89	9	Hanjiangdi Road, Zhangwan Street, Caidian District, Wuhan City, Hubei Province	7
113.969	30.6652	49	7	1	Houheling, Zhangwan Street, Caidian District, Wuhan City, Hubei Province	5
113.969	30.6741	66	8	9	Xinhe Village Committee of Hanjiangdi Xinhe Village, Zhangwan Street, Caidian District, Wuhan City, Hubei Province (Bus Station)	7
113.969	30.6831	622	78	14	Jianghui 2nd Road, Zoumaling Street, Dongxihu District, Wuhan City, Hubei Province	7
113.969	30.6921	139	19	8	Gezhouba High-end Equipment Industrial Park, He'an West Road, Xingou Town Street, Dongxihu District, Wuhan City, Hubei Province	7
113.969	30.7011	368	29	8	Xinggong 2nd Road, Xingou Town, Dongxihu District, Wuhan City, Hubei Province	7
113.969	30.7101	2821	103	14	Hexing Road, Xingou Town, Dongxihu District, Wuhan City, Hubei Province	8
113.969	30.7191	55	1	0	G42 Shanghai-Chengdu Expressway, Xingou Town Street, Dongxihu District, Wuhan City, Hubei Province	2
113.969	30.728	8	0	3	Gudu Road, Xin'andu Street, Dongxihu District, Wuhan City, Hubei Province	5
113.969	30.737	16	4	6	Zhangxin Road, Xin'andu Street, Dongxihu District, Wuhan City, Hubei Province	7
113.969	30.746	65	8	1	Hubei Guangyu Lighting New Energy Co., Ltd., Xin'andu Street, Dongxihu District, Wuhan City, Hubei Province	5
113.969	30.755	39	6	1	Manager Station of Xin'andu Street, Dongxihu District, Wuhan City, Hubei Province	5
113.969	30.764	17	0	1	Xin'andu Farm, Dongxihu District, Wuhan City, Hubei Province Hanyi Jinyuan Blueberry Garden	4
113.969	30.7729	1575	19	1	Satellite West Village, Xin'andu Street, Dongxihu District, Wuhan City, Hubei Province	6
113.969	30.7819	43	7	0	Hubei Xiaogan Zhuhu National Wetland Park, Xin'andu Street, Dongxihu District, Wuhan City, Hubei Province	3
113.979	30.2969	334	55	5	Dengnan Street Office of Hannan District People's Government, Jiefang 1st Road, Dengnan Street, Hannan District, Wuhan City, Hubei Province	7
113.979	30.3059	1191	202	22	Jiefang 5th Road, Dengnan Street, Hannan District, Wuhan City, Hubei Province	8
113.979	30.3149	3	0	0	S13 Wuhan Supervisory Expressway, Dengnan Street, Hannan District, Wuhan City, Hubei Province	0
113.979	30.3239	50	6	0	S13 Wuhan Supervisory Expressway, Dengnan Street, Hannan District, Wuhan City, Hubei Province	3
113.979	30.3328	2	0	0	S13 Wuhan Supervisory Expressway, Dongjing Street, Hannan District, Wuhan City, Hubei Province	0
113.979	30.3418	72	0	3	County 028, Dongjing Street, Hannan District, Wuhan City, Hubei Province	6
113.979	30.3598	7	6	0	Mechanical repair road in Huangshan Street, Caidian District, Wuhan City, Hubei Province	2
113.979	30.3688	21	8	0	Two armies line in Tonghu Street, Caidian District, Wuhan City, Hubei Province	3
113.979	30.3777	2	2	0	Two armies line in Tonghu Street, Caidian District, Wuhan City, Hubei Province	1
113.979	30.3867	2	0	0	Veterans Service Station of Jinniu Village, Qishan Street, Caidian District, Caidian District, Wuhan City, Hubei Province	0
113.979	30.3957	140	22	1	Gaojiatou, Qianshan Street, Caidian District, Wuhan City, Hubei Province	6
113.979	30.4047	198	20	4	Liuwan, Qianshan Street, Caidian District, Wuhan City, Hubei Province	7
113.979	30.4137	21	4	2	Liuwan, Qianshan Street, Caidian District, Wuhan City, Hubei Province	5
113.979	30.4316	78	0	1	Weihu Muye Farm, Qianshan Street, Caidian District, Wuhan City, Hubei Province	4
113.979	30.4406	33	6	1	Life in Longing for the Life of Lishan Street, Caidian District, Wuhan City, Hubei Province·Rural Academy (Lihu Store) Lihu Muye Farm	5
113.979	30.4496	865	101	1	Wuhan Juncheng, Qianshan Street, Caidian District, Wuhan City, Hubei Province	6
113.979	30.4586	202	35	3	Gaozhuang, Qianshan Street, Caidian District, Wuhan City, Hubei Province	7
113.979	30.4676	102	11	5	Anbo Wuhan Caidian Logistics Center (East Gate) in Anbo, Caidian Street, Caidian District, Wuhan City, Hubei Province	7
113.979	30.4765	1492	265	39	Wuhan Zhongwang Packaging Co., Ltd., Huangshan Street, Caidian District, Wuhan City, Hubei Province	8
113.979	30.4855	930	50	10	Shooting Hall, Caidian District, Wuhan City, Hubei Province	7
113.979	30.4945	202	16	11	Hewuzui, Qianshan Street, Caidian District, Wuhan City, Hubei Province	7
113.979	30.5035	742	150	24	Wuhan Weiner Building Materials Technology Co., Ltd., Yuxian Street, Caidian District, Wuhan City, Hubei Province	8
113.979	30.5125	309	32	2	Gongzhou Road, Yuxian Street, Caidian District, Wuhan City, Hubei Province	6
113.979	30.5215	2758	963	14	Gangling Road, Yuxian Street, Caidian District, Wuhan City, Hubei Province	8
113.979	30.5304	1027	115	7	Tang Jun, Yuxian Street, Caidian District, Wuhan City, Hubei Province	7
113.979	30.5394	460	28	2	Yusun Forest Farm, Yuxian Street, Caidian District, Wuhan City, Hubei Province	7
113.979	30.5484	1226	205	6	Longha Furniture Factory, Yuxian Street, Caidian District, Wuhan City, Hubei Province	7
113.979	30.5574	311	31	7	Hejia Road, Zhangwan Street, Caidian District, Wuhan City, Hubei Province	7
113.979	30.5664	869	96	1	Village Affairs Supervision Committee of Hejia Village, Zhangwan Street, Caidian District, Wuhan City, Hubei Province	6
113.979	30.5753	130	24	2	Xiaojiazui, Zhangwan Street, Caidian District, Wuhan City, Hubei Province	6
113.979	30.5843	2857	419	120	County Road 013, Zhangwan Street, Caidian District, Wuhan City, Hubei Province	8
113.979	30.5933	686	499	3	County Road 013, Zhangwan Street, Caidian District, Wuhan City, Hubei Province	7
113.979	30.6023	27	2	1	Shayaowan, Zhangwan Street, Caidian District, Wuhan City, Hubei Province	5
113.979	30.6113	320	41	0	Hubei Dinghe Shengshi Energy Saving Technology Co., Ltd., Zhangwan Street, Caidian District, Wuhan City, Hubei Province	5
113.979	30.6203	35	8	0	County Road 012, Zhangwan Street, Caidian District, Wuhan City, Hubei Province	3
113.979	30.6292	103	20	3	Xuyin Deng Village, Zhangwan Street, Caidian District, Wuhan City, Hubei Province	7
113.979	30.6382	140	16	4	Xujiatai (bus stop) in Hanjiang Dike, Zhangwan Street, Caidian District, Wuhan City, Hubei Province	7
113.979	30.6472	30	8	2	Hanjiangdi Road, Cihui Street, Dongxihu District, Wuhan City, Hubei Province	6
113.979	30.6562	75	15	5	Xinggong 8th Road, Zoumaling Street, Dongmaling District, Wuhan City, Hubei Province	7
113.979	30.6652	541	39	7	Yuanxiang South Road, Zoumaling Street, Dongxihu District, Wuhan City, Hubei Province	7
113.979	30.6741	121	7	4	Guangda Industrial Park, No. 158-5, Yousha Road, Zoumaling Street, Dongmaling District, Wuhan City, Hubei Province	7
113.979	30.6831	6154	936	151	Donghu beam making yard of Xinggong 4th Road, Xingou Town Street, Dongxihu District, Wuhan City, Hubei Province	8
113.979	30.6921	3009	410	37	He'an Road, Xingou Town, Dongxihu District, Wuhan City, Hubei Province	8
113.979	30.7011	4475	704	54	No. 58, Hehua Street, Xingou Town, Dongxihu District, Wuhan City, Hubei Province	8
113.979	30.7101	720	165	8	Wuhan Youfa Packaging Technology Co., Ltd., No. 21, Gexin Avenue, Xingou Town, Dongxihu District, Wuhan City, Hubei Province	7
113.979	30.7191	443	41	1	Hesha Road, Xingou Town, Dongxihu District, Wuhan City, Hubei Province	6
113.979	30.728	272	66	0	Hebo Lake, Xin'andu Street, Dongxihu District, Wuhan City, Hubei Province	5
113.979	30.737	336	43	9	Dongken Road, Xin'andu Street, Dong'anhu District, Wuhan City, Hubei Province	7
113.979	30.746	1870	121	4	Yuanjia Taipei 2nd Road, Xin'andu Street, Dongxihu District, Wuhan City, Hubei Province	7
113.979	30.755	205	45	1	Hanyi Road, Xin'andu Street, Dongxihu District, Wuhan City, Hubei Province	6
113.979	30.764	1717	299	0	Zhile Kindergarten, Xin'andu Street, Dongxihu District, Wuhan City, Hubei Province	6
113.979	30.7729	173	49	2	Hui'an Avenue, Xin'andu Street, Dongxihu District, Wuhan City, Hubei Province	6
113.979	30.7819	140	37	0	Wuhan Xixiaozhai Resort, Xin'andu Street, Dongxihu District, Wuhan City, Hubei Province Hubei Province	5
113.99	30.2879	2	2	0	Hubei Ouya Hengtong Co., Ltd., Dengnan Street, Hannan District, Wuhan City, Hubei Province	1
113.99	30.2969	37	6	25	Shuita Road, Dengnan Street, Hannan District, Wuhan City, Hubei Province	7
113.99	30.3059	105	24	32	No. 158, Zhenxing Street, Dengnan Street, Hannan District, Wuhan City, Hubei Province	8
113.99	30.3149	24	6	0	Huanshan 3rd Road, Dengnan Street, Hannan District, Wuhan City, Hubei Province	3
113.99	30.3239	117	17	3	Huanshan 4th Road, Dengnan Street, Hannan District, Wuhan City, Hubei Province	7
113.99	30.3328	11	3	0	Wuzhanghe, Dongjing Street, Hannan District, Wuhan City, Hubei Province	2
113.99	30.3418	46	2	4	County 028, Dongjing Street, Hannan District, Wuhan City, Hubei Province	6
113.99	30.3508	6	0	0	Qiannan Road Bridge, Dongjing Street, Hannan District, Wuhan City, Hubei Province	0
113.99	30.3598	7	0	0	Two armies line in Dongjing Street, Hannan District, Wuhan City, Hubei Province	0
113.99	30.3688	48	2	1	Two armies line in Qianshan Street, Caidian District, Wuhan City, Hubei Province	5
113.99	30.3777	5	0	0	Ganjiazui, Qianshan Street, Caidian District, Wuhan City, Hubei Province	0
113.99	30.3867	1	0	0	No. 22, Edaowan, Tonghu Street, Caidian District, Wuhan City, Hubei Province	0
113.99	30.3957	77	10	4	Fishing base of Xingguang Ecological Agricultural Park, County Dao, 016, Caidian District, Wuhan City, Hubei Province	7
113.99	30.4047	53	15	0	Lao Yuanwan, Huangshan Street, Caidian District, Wuhan City, Hubei Province	4
113.99	30.4137	2	0	0	Dingjiu Village, Yishan Street, Caidian District, Wuhan City, Hubei Province	0
113.99	30.4227	1	0	0	Xiajiazui, Qianshan Street, Caidian District, Wuhan City, Hubei Province	0
113.99	30.4316	27	6	0	Wanjiazui, Qianshan Street, Caidian District, Wuhan City, Hubei Province	3
113.99	30.4406	76	23	11	Wuhan Yingda Wood Packaging Heat Treatment Co., Ltd., Xushan Street, Caidian District, Wuhan City, Hubei Province	7
113.99	30.4496	1117	172	28	Xiaoxiongwan, Huangshan Street, Caidian District, Wuhan City, Hubei Province Wuhan Pujiang Yanpu Auto Parts Co., Ltd.	8
113.99	30.4586	5907	153	2	G50 Shanghai-Chongqing Expressway, Huangshan Street, Caidian District, Wuhan City, Hubei Province	7
113.99	30.4676	88	2	1	Tanshu Avenue, Huangshan Street, Caidian District, Wuhan City, Hubei Province	5
113.99	30.4765	292	40	23	Wuhan Motor Vehicle Driver's Second Test Room for the Second Test of the Wuhan City Motorcycle Driver's Second Subject, Caidian District, Wuhan City, Hubei Province	7
113.99	30.4855	166	10	5	Gaolaozhuang Fishing Field, Huangshan Street, Caidian District, Wuhan City, Hubei Province	7
113.99	30.4945	420	29	7	Songyang Avenue, Qianshan Street, Caidian District, Wuhan City, Hubei Province	7
113.99	30.5035	59	8	2	Wuhan Yimeijia Exhibition Production Factory, Yuxian Street, Caidian District, Wuhan City, Hubei Province	6
113.99	30.5125	16	2	12	Yuxian Street Office, Provincial Highway 104, Yuxian Street, Caidian District, Wuhan City, Hubei Province	7
113.99	30.5215	380	140	110	Linlin tire repair car wash and wax in Yuxian Street, Caidian District, Wuhan City, Hubei Province	8
113.99	30.5304	107	9	3	Provincial Road 104, Yuxian Street, Caidian District, Wuhan City, Hubei Province	6
113.99	30.5394	1264	190	3	Provincial Road 104, Yuxian Street, Caidian District, Wuhan City, Hubei Province	7
113.99	30.5484	696	78	11	Dajizhuang, Yuxian Street, Caidian District, Wuhan City, Hubei Province	7
113.99	30.5574	142	13	1	Wuhan Xinhongqiang Lifting Co., Ltd., Yuxian Street, Caidian District, Wuhan City, Hubei Province	6
113.99	30.5664	111	4	9	Shangdushan Road, Zhangwan Street, Caidian District, Wuhan City, Hubei Province	7
113.99	30.5753	330	33	4	Shangdushan Road, Zhangwan Street, Caidian District, Wuhan City, Hubei Province	7
113.99	30.5843	1329	234	40	Liwan Road, Zhangwan Street, Caidian District, Wuhan City, Hubei Province	8
113.99	30.5933	16	0	3	Sihong Village, Zhangwan Street, Caidian District, Wuhan City, Hubei Province	5
113.99	30.6023	19	1	1	Branch Committee of the Communist Party of China West Lake Horticulture Co., Ltd., Zhangwan Street, Caidian District, Wuhan City, Hubei Province	4
113.99	30.6113	71	9	1	County Road 012, Zhangwan Street, Caidian District, Wuhan City, Hubei Province	5
113.99	30.6203	84	6	1	Yinjiatai, Zhangwan Street, Caidian District, Wuhan City, Hubei Province	5
113.99	30.6292	36	3	10	Wuhan Oriental Spiritual Rehabilitation Center, Zhangwan Street, Caidian District, Wuhan City, Hubei Province	7
113.99	30.6382	4787	244	24	Huixin 5th Road, Zoumaling Street, Dongxihu District, Wuhan City, Hubei Province	8
113.99	30.6472	226	32	1	Huixin 3rd Road, Zoumaling Street, Dongxihu District, Wuhan City, Hubei Province	6
113.99	30.6562	97	15	2	Tianyuan Road, Zoumaling Street, Dongxihu District, Wuhan City, Hubei Province	6
113.99	30.6652	80	61	13	Xinggong 8th Road, Zoumaling Street, Dongmaling District, Wuhan City, Hubei Province	7
113.99	30.6741	129	23	4	Xinggong 6th Road, Xingou Town, Dongxihu District, Wuhan City, Hubei Province	7
113.99	30.6831	1307	114	92	Wuhan Dongli Photovoltaic Electronics Co., Ltd., No. 19, Yousha Road, Xingou Town, Donghu District, Wuhan City, Hubei Province	8
113.99	30.6921	2091	419	40	Hehua Street, Xingou Town, Dongxihu District, Wuhan City, Hubei Province	8
113.99	30.7011	322	118	11	Hubei Xudong Industrial Co., Ltd., Xinggong 3rd Road, Xingou Town Street, Dongxihu District, Wuhan City, Hubei Province	7
113.99	30.7101	5732	485	7	Hexiang Road, Xingou Town, Dongxihu District, Wuhan City, Hubei Province	7
113.99	30.7191	675	92	16	Guodong 1st Road, Xin'andu Street, Dongxihu District, Wuhan City, Hubei Province	7
113.99	30.728	172	31	54	Dongken Road, Xin'andu Street, Dong'anhu District, Wuhan City, Hubei Province	8
113.99	30.737	699	153	16	Dongken Road, Xin'andu Street, Dong'anhu District, Wuhan City, Hubei Province	8
113.99	30.746	23	6	1	Donghu Avenue, Xin'andu Street, Donghu District, Wuhan City, Hubei Province	5
113.99	30.755	353	133	17	Yimanou Garden Landscape Co., Ltd., Dongshan Street, Dongshan District, Wuhan City, Hubei Province Wuhan Xinyouwei Decoration Engineering Co., Ltd.	8
113.99	30.764	2676	95	27	Party Members and Mass Service Center of Xiangyang Brigade, Dongshan Street, Dongshan District, Wuhan City, Hubei Province	8
113.99	30.7729	113	9	8	No. 60, Dongshan Street, Dongshan Street, Donghu District, Wuhan City, Hubei Province	7
113.99	30.7819	14	4	0	Hubei Xiaogan Zhuhu National Wetland Park, Xin'andu Street, Dongxihu District, Wuhan City, Hubei Province	2
114	30.2789	40	4	0	Hannan Ferry Terminal, Shamao Street, Hannan District, Wuhan City, Hubei Province	3
114	30.2879	320	68	0	Hansha Line, Dengnan Street, Hannan District, Wuhan City, Hubei Province	5
114	30.2969	47	5	2	Hansha Line, Dengnan Street, Hannan District, Wuhan City, Hubei Province	6
114	30.3059	10	4	0	Daguzi Road, Dengnan Street, Hannan District, Wuhan City, Hubei Province	2
114	30.3149	10	2	0	Mayinghe Avenue, Dengnan Street, Hannan District, Wuhan City, Hubei Province	2
114	30.3239	58	5	1	S13 Wuhan Supervisory Expressway, Dongjing Street, Hannan District, Wuhan City, Hubei Province	5
114	30.3328	20	3	0	S13 Wuhan Supervisory Expressway, Dongjing Street, Hannan District, Wuhan City, Hubei Province	2
114	30.3418	52	2	5	Branch Committee of the Huangjiadun Brigade of the Communist Party of China, Dongjing Street, Hannan District, Wuhan City, Hubei Province	6
114	30.3508	22	8	0	Branch Committee of the Huangjiadun Brigade of the Communist Party of China, Dongjing Street, Hannan District, Wuhan City, Hubei Province	3
114	30.3598	34	20	1	Two armies line in Qianshan Street, Caidian District, Wuhan City, Hubei Province	5
114	30.3688	450	27	5	Guo Jun, Qianshan Street, Caidian District, Wuhan City, Hubei Province	7
114	30.3777	40	18	1	Lizishan (bus stop) in Sanyang Village, Qianshan, Caidian District, Wuhan City, Hubei Province	5
114	30.3867	2	0	0	Tonghu, Qianshan Street, Caidian District, Wuhan City, Hubei Province	0
114	30.3957	166	15	7	Yuanchun Comprehensive Wholesale Department, Huangshan Street, Caidian District, Wuhan City, Hubei Province	7
114	30.4047	4	0	0	Shijiazui, Qianshan Street, Caidian District, Wuhan City, Hubei Province	0
114	30.4137	6	5	1	Yangwan, Qianshan Street, Caidian District, Wuhan City, Hubei Province	4
114	30.4227	137	47	2	Dingjiu Village, Yishan Street, Caidian District, Wuhan City, Hubei Province	6
114	30.4316	93	10	3	Luoyantou, Qingshan Street, Caidian District, Wuhan City, Hubei Province	6
114	30.4406	295	17	16	Wuhan Shuidekang Hardware Manufacturing Co., Ltd., Caidian District, Wuhan City, Hubei Province	7
114	30.4496	7240	712	56	Wuhan Shengtailong New Energy Equipment Co., Ltd., Shuangfeng 4th Road, Xushan Street, Caidian District, Wuhan City, Hubei Province	8
114	30.4586	8889	441	17	Yunda Express (Wuhan Distribution Center) in Conglin Road, Heshan Street, Caidian District, Wuhan City, Hubei Province	8
114	30.4676	501	58	1	Tanshu 3rd Road, Lingshan Street, Caidian District, Wuhan City, Hubei Province	6
114	30.4765	82	2	1	Dayangwan, Yishan Street, Caidian District, Wuhan City, Hubei Province	5
114	30.4855	51	14	1	Songyang Avenue, Daji Street, Caidian District, Wuhan City, Hubei Province	5
114	30.4945	79	12	3	Songyang Avenue, Daji Street, Caidian District, Wuhan City, Hubei Province	6
114	30.5035	46	1	0	Tongcheng Avenue, Yuxian Street, Caidian District, Wuhan City, Hubei Province	2
114	30.5125	47	10	0	Tongcheng Avenue, Yuxian Street, Caidian District, Wuhan City, Hubei Province	4
114	30.5215	4	0	0	Liujiazui, Yuxian Street, Caidian District, Wuhan City, Hubei Province	0
114	30.5304	24	5	7	Yusun Mountain Cemetery, Yuxian Street, Caidian District, Wuhan City, Hubei Province	7
114	30.5394	1255	315	0	Caowan, Yuxian Street, Caidian District, Wuhan City, Hubei Province	6
114	30.5484	338	31	11	S15 Hancai Expressway, Yuxian Street, Caidian District, Wuhan City, Hubei Province	7
114	30.5574	2349	623	9	Caiwan, Yuxian Street, Caidian District, Wuhan City, Hubei Province	7
114	30.5664	123	12	2	Chenggong Avenue, Zhangwan Street, Caidian District, Wuhan City, Hubei Province	6
114	30.5753	70018	2250	1	Lianhua Lake Avenue, Zhangwan Street, Caidian District, Wuhan City, Hubei Province	7
114	30.5843	16104	1278	38	Fengsheng Furniture, Zhangwan Street, Caidian District, Wuhan City, Hubei Province	8
114	30.5933	309	32	2	Mei Feng, Zhangwan Street, Caidian District, Wuhan City, Hubei Province	6
114	30.6023	902	105	0	Branch Committee of the Communist Party of China West Lake Horticulture Co., Ltd., Zhangwan Street, Caidian District, Wuhan City, Hubei Province	6
114	30.6113	294	73	5	Wuhan Luanfei Packaging Co., Ltd., Zhangwan Street, Caidian District, Wuhan City, Hubei Province	7
114	30.6203	8	1	0	Hanjiangdi Road, Cihui Street, Dongxihu District, Wuhan City, Hubei Province	1
114	30.6292	75	7	5	Dongfanghong3rd Road, Zoumaling Street, Dongmaling District, Wuhan City, Hubei Province	7
114	30.6382	232	52	76	Area B of Lejia Community, Yinxin Road, Zoumaling Street, Dongxihu District, Wuhan City, Hubei Province	8
114	30.6472	486	87	26	Lianmeng Road, Zoumaling Street, Dongxihu District, Wuhan City, Hubei Province	8
114	30.6562	1906	94	4	Wuhan Beisimei Biotechnology Co., Ltd., Zoumaling Street, Dongxihu District, Wuhan City, Hubei Province	7
114	30.6652	2568	230	2	Cai Mingwei Industrial Park, Zoumaling Street, Dongxihu District, Wuhan City, Hubei Province	7
114	30.6741	372	80	6	Xinggong 7th Road, Xingou Town, Dongxihu District, Wuhan City, Hubei Province	7
114	30.6831	500	39	39	Liangang Road, Xingou Town, Dongxihu District, Wuhan City, Hubei Province	8
114	30.6921	245	45	10	Dongwu Avenue, Xingou Town, Dongxihu District, Wuhan City, Hubei Province	7
114	30.7011	169	21	0	G42 Shanghai-Chengdu Expressway, Xingou Town Street, Dongxihu District, Wuhan City, Hubei Province	5
114	30.7101	13	2	7	Wuhan Construction Xinxing Building Materials Green Industry Technology Co., Ltd., Dongwu Avenue, Xingou Town Street, Dongwuhu District, Wuhan City, Hubei Province	7
114	30.7191	335	45	1	Guosha Road, Xin'andu Street, Dongxihu District, Wuhan City, Hubei Province	6
114	30.728	14	3	1	Linshazhong Road, Xin'andu Street, Dongxihu District, Wuhan City, Hubei Province	4
114	30.737	18	3	0	No. 11, Linsha New Village, Xin'andu Street, Dongxihu District, Wuhan City, Hubei Province	2
114	30.746	93	10	0	Beigangou Road, Xin'andu Street, Dongxihu District, Wuhan City, Hubei Province	4
114	30.755	168	38	8	Beigangou Road, Dongshan Street, Dongshan District, Donghu District, Wuhan City, Hubei Province	7
114	30.764	14	7	4	No. 66 Dongshan Street, Dongshan Street, Dongshan District, Donghu District, Wuhan City, Hubei Province	6
114	30.7729	295	27	1	Dongbai Road, Dongshan Street, Dongshan District, Wuhan City, Hubei Province	6
114	30.7819	32	7	2	Weidi, Dongshan Street, Dongshan District, Wuhan City, Hubei Province, Hubei Xiaogan Zhuhu National Wetland Park	6
114.011	30.27	1	0	0	Wuhan Waterway Shipyard, Shamao Street, Hannan District, Wuhan City, Hubei Province	0
114.011	30.2789	45	7	2	Hannan Ferry Terminal, Shamao Street, Hannan District, Wuhan City, Hubei Province	6
114.011	30.2879	179	29	2	Hansha Line, Shamao Street, Hannan District, Wuhan City, Hubei Province	6
114.011	30.2969	42	6	2	Wuhan Garden Vegetable Professional Cooperative, Dengnan Street, Hannan District, Wuhan City, Hubei Province	6
114.011	30.3059	18	16	2	Zhoujiahe Road, Dengnan Street, Hannan District, Wuhan City, Hubei Province	6
114.011	30.3149	4	0	0	Mayinghe Avenue, Dongjing Street, Hannan District, Wuhan City, Hubei Province	0
114.011	30.3239	32	8	3	Mayinghe Avenue, Dongjing Street, Hannan District, Wuhan City, Hubei Province	6
114.011	30.3328	41	10	2	002 Township Road, Dongjing Street, Hannan District, Wuhan City, Hubei Province	6
114.011	30.3418	26	6	2	Qingcaohu Road, Tonghu Street, Caidian District, Wuhan City, Hubei Province	6
114.011	30.3508	12	0	0	Qingcaohu Road, Tonghu Street, Caidian District, Wuhan City, Hubei Province	1
114.011	30.3598	2	0	0	Next week, Qianshan Street, Caidian District, Wuhan City, Hubei Province	0
114.011	30.3688	8	0	2	Next week, Qianshan Street, Caidian District, Wuhan City, Hubei Province	5
114.011	30.3777	222	54	0	089 Township Road, Qianshan Street, Caidian District, Wuhan City, Hubei Province	5
114.011	30.3867	48	2	0	Yanjiazui, Yanshan Street, Caidian District, Wuhan City, Hubei Province	3
114.011	30.3957	192	2	10	County Road 016, Qianshan Street, Caidian District, Wuhan City, Hubei Province	7
114.011	30.4047	257	7	0	Wanwan, Qianshan Street, Caidian District, Wuhan City, Hubei Province	4
114.011	30.4137	2	2	0	Wanwan, Qianshan Street, Caidian District, Wuhan City, Hubei Province	1
114.011	30.4227	7	7	2	Dingjiu Village, Yishan Street, Caidian District, Wuhan City, Hubei Province	5
114.011	30.4316	79	17	1	Changjun Street, Qianshan Street, Caidian District, Wuhan City, Hubei Province	6
114.011	30.4406	17173	3607	10	Traffic Investment of Changfu Street, Changfu Street, Caidian District, Wuhan City, Hubei Province·Yijing Tianchen	8
114.011	30.4496	19333	2581	612	No. 90 Baihequan West Street, Caidian District, Caidian District, Wuhan City, Hubei Province	8
114.011	30.4586	11824	1781	69	Building 20, No. 101, Shuangfeng Street, Caidian District, Wuhan City, Hubei Province	8
114.011	30.4676	2003	522	15	Wuhan Zhiaide Technology Co., Ltd., Xushan Street, Caidian District, Wuhan City, Hubei Province	8
114.011	30.4765	714	76	1	Hubei Yuyang Water Engineering Co., Ltd., Qianshan Street, Caidian District, Wuhan City, Hubei Province	6
114.011	30.4855	49	10	1	Funiu Community Service Station, Daji Street, Caidian District, Caidian District, Wuhan City, Hubei Province	5
114.011	30.4945	247	25	2	Songyang Avenue, Daji Street, Caidian District, Wuhan City, Hubei Province	6
114.011	30.5035	371	124	2	Tongcheng Avenue, Yuxian Street, Caidian District, Wuhan City, Hubei Province	7
114.011	30.5125	367	178	2	Zhang Youkun Qinxiao Studio, Wuhan University Guqin Culture Institute, Daji Street, Caidian District, Wuhan City, Hubei Province	7
114.011	30.5215	182	15	4	No. 76, Jinxi Road, Caidian Street, Caidian District, Wuhan City, Hubei Province	7
114.011	30.5304	769	66	5	Yuanliuzui, Yuxian Street, Caidian District, Wuhan City, Hubei Province	7
114.011	30.5394	565	59	0	Yeluzui, Caidian Street, Caidian District, Wuhan City, Hubei Province	5
114.011	30.5484	431	27	0	Dongjiazui, Caidian Street, Caidian District, Wuhan City, Hubei Province	5
114.011	30.5574	184	45	6	Gaofu Street, Caidian Street, Caidian District, Wuhan City, Hubei Province	7
114.011	30.5664	2979	716	15	Provincial Road 104, Caidian Street, Caidian District, Wuhan City, Hubei Province	8
114.011	30.5753	31564	5851	161	Sanhe Cambridge City, Taifeng Road, Caidian Street, Caidian District, Wuhan City, Hubei Province	8
114.011	30.5843	29355	2745	81	COFCO Xiangyun Subway Town Marketing Center, Taifeng Road, Caidian Street, Caidian District, Wuhan City, Hubei Province	8
114.011	30.5933	6404	765	21	Minjiazui, Zhangwan Street, Caidian District, Wuhan City, Hubei Province	8
114.011	30.6023	1191	108	9	Laoxiao Fishing Farm Jinjia New Wall Materials Products Co., Ltd., Zhangwan Street, Caidian District, Wuhan City, Hubei Province	7
114.011	30.6113	478	32	1	County Road 012, Zhangwan Street, Caidian District, Wuhan City, Hubei Province	6
114.011	30.6203	2	0	0	Lu'an West 2nd Road, Zuomaling Street, Dongxihu District, Wuhan City, Hubei Province	0
114.011	30.6292	264	38	2	Xinggong 12th Road, Zoumaling Street, Dongxihu District, Wuhan City, Hubei Province	7
114.011	30.6382	762	47	5	Xinyuan Road, Zoumaling Street, Dongxihu District, Wuhan City, Hubei Province	7
114.011	30.6472	4574	493	19	Food 1st Road, Zoumaling Street, Dongxihu District, Wuhan City, Hubei Province	8
114.011	30.6562	2745	591	60	Xiangheng Packaging, Jiexin Avenue, Zoumaling Street, Dongxihu District, Wuhan City, Hubei Province	8
114.011	30.6652	4815	369	6	China Petroleum and Chemical Hydrogen Energy Innovation Avenue Comprehensive Energy Station, Zoumaling Street, Dongxihu District, Wuhan City, Hubei Province	7
114.011	30.6741	3445	497	6	Xingouchi, Xingou Town, Dongxihu District, Wuhan City, Hubei Province	7
114.011	30.6831	1005	101	12	Dongwu Avenue, Xingou Town, Dongxihu District, Wuhan City, Hubei Province	7
114.011	30.6921	525	86	1	Hechi Road, Xingou Town, Dongxihu District, Wuhan City, Hubei Province	6
114.011	30.7011	15	2	2	Xinggong 4th Road, Xingou Town, Dongxihu District, Wuhan City, Hubei Province	5
114.011	30.7101	46	19	0	Zhugangou Road, Xin'andu Street, Dongxihu District, Wuhan City, Hubei Province	4
114.011	30.7191	49	6	0	Huchen West Road, Xin'andu Street, Dongxihu District, Wuhan City, Hubei Province	3
114.011	30.728	5	0	0	Huchen West Road, Xin'andu Street, Dongxihu District, Wuhan City, Hubei Province	0
114.011	30.737	1405	159	1	Huchen West Road, Xin'andu Street, Dongxihu District, Wuhan City, Hubei Province	7
114.011	30.746	19	4	0	Huchen West Road, Xin'andu Street, Dongxihu District, Wuhan City, Hubei Province	3
114.011	30.755	533	71	1	Beigangou Road, Dongshan Street, Dongshan District, Donghu District, Wuhan City, Hubei Province	6
114.011	30.764	350	45	9	Wuhan Yongcen Technology Co., Ltd., Dongshan Street, Dongshan District, Wuhan City, Hubei Province	7
114.011	30.7729	3620	286	22	Dongqiao 2nd Road, Dongshan Street, Dongxihu District, Wuhan City, Hubei Province	8
114.011	30.7819	1891	139	1	Dongshan Street, Dongshan District, Donghu District, Wuhan City, Hubei Province	7
114.021	30.261	14	0	1	Changjiang, Shamao Street, Hannan District, Wuhan City, Hubei Province	4
114.021	30.27	1	0	0	Tongfei Avenue, Shamao Street, Hannan District, Wuhan City, Hubei Province	0
114.021	30.2789	18	2	0	Tongfei Avenue, Shamao Street, Hannan District, Wuhan City, Hubei Province	2
114.021	30.2879	25	3	2	Hansha Line, Shamao Street, Hannan District, Wuhan City, Hubei Province	5
114.021	30.2969	383	18	0	Four-season Fresh Fruit Sightseeing Picking Garden, Shamao Street, Hannan District, Wuhan City, Hubei Province	5
114.021	30.3059	1061	155	7	Wuhan Deshili Food Industrial Park, Shamao Street, Hannan District, Wuhan City, Hubei Province	7
114.021	30.3149	578	25	0	Zhoujiahe Road, Shamao Street, Hannan District, Wuhan City, Hubei Province	5
114.021	30.3239	112	4	2	Ruizhan Shang Concrete Station, Dongjing Street, Hannan District, Wuhan City, Hubei Province	6
114.021	30.3328	99	19	1	County 028, Dongjing Street, Hannan District, Wuhan City, Hubei Province	6
114.021	30.3418	46	7	0	County 028, Dongjing Street, Hannan District, Wuhan City, Hubei Province	3
114.021	30.3508	63	0	0	Anletan, Yishan Street, Caidian District, Wuhan City, Hubei Province	2
114.021	30.3598	4	0	0	Liujiadun, Qianshan Street, Caidian District, Wuhan City, Hubei Province	0
114.021	30.3688	9	0	0	089 Township Road, Qianshan Street, Caidian District, Wuhan City, Hubei Province	0
114.021	30.3777	2	0	4	Xiaowan, Huangshan Street, Caidian District, Wuhan City, Hubei Province	5
114.021	30.3867	4	4	1	089 Township Road, Qianshan Street, Caidian District, Wuhan City, Hubei Province	4
114.021	30.3957	77	2	12	Sanjiadian, Caidian District, Wuhan City, Hubei Province	7
114.021	30.4047	48	6	2	Wanwan, Qianshan Street, Caidian District, Wuhan City, Hubei Province	6
114.021	30.4137	16	0	0	Zhujia Village Health Room in Zhushan Street, Huangshan Street, Caidian District, Wuhan City, Hubei Province	1
114.021	30.4227	10	0	0	Qianzishan Avenue, Wuhan Changfu Industrial Demonstration Park, Caidian District, Wuhan City, Hubei Province	0
114.021	30.4316	109	13	2	Zhou Bazui, Qianshan Street, Caidian District, Wuhan City, Hubei Province	6
114.021	30.4406	1446	404	85	Phase 3 of Xinyuan, Xinshan Street, Caidian District, Wuhan City, Hubei Province	8
114.021	30.4496	4744	1051	595	Xingguang West Road, Qianshan Street, Caidian District, Wuhan City, Hubei Province	8
114.021	30.4586	3898	492	115	Starlight Building Materials City, G50 Shanghai-Chongqing Expressway, Qishan Street, Caidian District, Wuhan City, Hubei Province	8
114.021	30.4676	3606	439	23	Star Avenue, Yishan Street, Caidian District, Wuhan City, Hubei Province	8
114.021	30.4765	1297	134	9	China Petrochemical Huangxing Avenue Gas Station, Daji Street, Caidian District, Wuhan City, Hubei Province Wuhan Jialanchuan Technology Co., Ltd.	7
114.021	30.4855	369	72	1	Funiu Mountain, Daji Street, Caidian District, Wuhan City, Hubei Province	6
114.021	30.4945	92	6	3	Wuhan Wanwan Farm, Daji Street, Caidian District, Wuhan City, Hubei Province	6
114.021	30.5035	979	257	8	Huanghu Village, Daji Subdistrict, Caidian District, Wuhan City, Hubei Province	7
114.021	30.5125	52	11	5	Qingjingshan Residence, Yunwai Pastoral Lezhongtang, Daji Street, Caidian District, Wuhan City, Hubei Province	7
114.021	30.5215	33	3	2	Tongcheng Avenue, Caidian Street, Caidian District, Wuhan City, Hubei Province	6
114.021	30.5304	174	47	46	Qiuwutai, Caidian Street, Caidian District, Wuhan City, Hubei Province	8
114.021	30.5394	7782	810	79	Hubei Transportation Engineering Testing Center Co., Ltd., Caidian Street, Caidian District, Wuhan City, Hubei Province	8
114.021	30.5484	794	144	7	Fishing ground in Caidian Street, Caidian District, Wuhan City, Hubei Province	7
114.021	30.5574	2201	524	16	Prolos Caidian Logistics Park, Caidian Street, Caidian District, Wuhan City, Hubei Province (South Gate)	8
114.021	30.5664	6920	1464	75	No. 200, Lianhuahu Avenue, Caidian Street, Caidian District, Wuhan City, Hubei Province	8
114.021	30.5753	33263	6372	858	Xiangxin Tianjiao City, Wenxing Road, Caidian Street, Caidian District, Wuhan City, Hubei Province	9
114.021	30.5843	21895	3274	534	Wangjiang Garden, No. 62, Wenzheng Street, Caidian Street, Caidian District, Wuhan City, Hubei Province	8
114.021	30.5933	6203	645	58	No. 4, Attachment 47, Caizhang 2nd Road, Caidian Street, Caidian District, Wuhan City, Hubei Province	8
114.021	30.6023	2536	74	1	Lao Yazui Wuhan Flower World, Cihui Street, Dongxihu District, Wuhan City, Hubei Province	6
114.021	30.6113	90	9	1	Xinqing Road, Zoumaling Street, Dongxihu District, Wuhan City, Hubei Province	5
114.021	30.6203	198	20	4	Lu'an East 1st Road, Zoumaling Street, Dongxihu District, Wuhan City, Hubei Province	7
114.021	30.6292	305	32	17	Lianmeng Road, Zoumaling Street, Dongxihu District, Wuhan City, Hubei Province	7
114.021	30.6382	5441	640	62	Phase 5 of Tongxin Garden, Zoumaling Street, Dongxihu District, Wuhan City, Hubei Province	8
114.021	30.6472	10689	1694	74	The community of Zoumaling Huimin New Village, Zoumaling Street, Dongmaling District, Wuhan City, Hubei Province (North District)	8
114.021	30.6562	34221	7287	44	No. 567, Donghu Avenue, Zoumaling Street, Donghu District, Wuhan City, Hubei Province	8
114.021	30.6652	9898	217	30	No. 7, Shangma Ling Street, Zoumaling Street, Dongxihu District, Wuhan City, Hubei Province Kerry Logistics	8
114.021	30.6741	9463	573	15	Xingong 8th Road, Xingou Town, Dongxihu District, Wuhan City, Hubei Province	8
114.021	30.6831	319	63	1	Xinggong 7th Road, Xingou Town, Dongxihu District, Wuhan City, Hubei Province	6
114.021	30.6921	6	0	1	Yousha Road, Xingou Town, Dongxihu District, Wuhan City, Hubei Province	3
114.021	30.7011	27	0	4		6
114.021	30.7101	49	31	2	Bajialin, Dongshan Street, Dongshan District, Wuhan City, Hubei Province	6
114.021	30.7191	10	0	1	Bajialin, Dongshan Street, Dongshan District, Wuhan City, Hubei Province	4
114.021	30.728	23	0	0	Wusi North Road, Dongshan Street, Dongshan District, Donghu District, Wuhan City, Hubei Province	1
114.021	30.737	98	14	2	East Road, Wuyi Ring Village, Dongshan Street, Dongshan District, Wuhan City, Hubei Province	6
114.021	30.746	41	9	7	Huchen Road, Dongshan Street, Dongshan Street, Donghu District, Wuhan City, Hubei Province	7
114.021	30.755	99	15	4	Huchen Road, Dongshan Street, Dongshan Street, Donghu District, Wuhan City, Hubei Province	7
114.021	30.764	36	15	8	S17 Qiaoxiao Expressway, Dongshan Street, Dongshan District, Wuhan City, Hubei Province	7
114.021	30.7729	1798	486	264	Huihua Energy Gas Station, Dongshan Street, Dongshan Street, Dongshan District, Wuhan City, Hubei Province	8
114.021	30.7819	1153	116	4	Dongshan Street, Dongshan District, Donghu District, Wuhan City, Hubei Province	7
114.032	30.234	8	4	0	Tongjin, Shamao Street, Hannan District, Wuhan City, Hubei Province	2
114.032	30.243	25	9	1	Fengqing Road, Shamao Street, Hannan District, Wuhan City, Hubei Province	5
114.032	30.252	9	7	2	Xingwang Liangbreed Pig Farm in Dongjiang Village, Dazui, Shamao Street, Hannan District, Wuhan City, Hubei Province	5
114.032	30.261	8	2	3	Hanzhi Wharf, Shamao Street, Hannan District, Wuhan City, Hubei Province	6
114.032	30.27	29	0	0	Jianger Road, Shamao Street, Hannan District, Wuhan City, Hubei Province	1
114.032	30.2789	21	0	0	Jianger Road, Shamao Street, Hannan District, Wuhan City, Hubei Province	1
114.032	30.2879	12	6	8	Lutes Global Smart Factory, Shamao Street, Hannan District, Wuhan City, Hubei Province (under construction)	7
114.032	30.2969	526	89	7	Minkangyuan (Northeast Gate of the South District) Minkangyuan District, Shamao Street, Hannan District, Wuhan City, Hubei Province	7
114.032	30.3059	829	84	13	Shama Avenue, Shama Street, Hannan District, Wuhan City, Hubei Province	7
114.032	30.3149	86	6	2	Zhoujiahe Road, Shamao Street, Hannan District, Wuhan City, Hubei Province	6
114.032	30.3239	234	23	1	Yuwen Road, Dongjing Street, Hannan District, Wuhan City, Hubei Province	6
114.032	30.3328	381	94	8	Wuhan Evergrande Times New City, Yuwen Road, Dongjing Street, Hannan District, Wuhan City, Hubei Province	7
114.032	30.3418	403	353	1	Auxiliary Road, Shamao Avenue, Dongjing Street, Hannan District, Wuhan City, Hubei Province	7
114.032	30.3508	15	0	0	Anle Bridge, Dongjing Street, Hannan District, Wuhan City, Hubei Province	1
114.032	30.3598	4	2	0	Tongshun River, Junshan Street, Caidian District, Wuhan City, Hubei Province	1
114.032	30.3688	8	0	0	089 Township Road, Junshan Street, Caidian District, Wuhan City, Hubei Province	0
114.032	30.3777	21	0	0	Yuelinshan, Qianshan Street, Caidian District, Wuhan City, Hubei Province	1
114.032	30.3957	3	0	2	Yaowan, Qianshan Street, Caidian District, Wuhan City, Hubei Province	4
114.032	30.4047	860	423	5	Veterans Service Station of Luojia Village, Caidian Street, Caidian District, Caidian District, Wuhan City, Hubei Province	7
114.032	30.4137	339	27	0	Veterans Service Station of Luojia Village, Caidian Street, Caidian District, Caidian District, Wuhan City, Hubei Province	5
114.032	30.4227	529	70	1	Agate 5th Road, Wuhan Changfu Industrial Demonstration Park, Caidian District, Wuhan City, Hubei Province	6
114.032	30.4316	7851	878	16	Qianzishan Avenue, Qianshan Street, Caidian District, Wuhan City, Hubei Province	8
114.032	30.4406	3264	401	16	Intelligent Control Branch of Dongfeng Fuji Thomson Thermotor Co., Ltd., Xushan Street, Caidian District, Wuhan City, Hubei Province	8
114.032	30.4496	27987	466	55	Prolos Wuhan Caidian Changfu Logistics Park, No. 199 Qianzishan Avenue, Qianshan Street, Caidian District, Wuhan City, Hubei Province	8
114.032	30.4586	2614	365	58	G50 Shanghai-Chongqing Expressway, Huangshan Street, Caidian District, Wuhan City, Hubei Province	8
114.032	30.4676	1385	365	41	Second Street, Huayuanwan, Daji Street, Caidian District, Wuhan City, Hubei Province	8
114.032	30.4765	2012	247	0	Wuhan Oupai Smart Home Co., Ltd., Huayuanwan Street, Daji Street, Caidian District, Wuhan City, Hubei Province	6
114.032	30.4855	182	24	5	County Road 015, Daji Street, Caidian District, Wuhan City, Hubei Province	7
114.032	30.4945	76	14	1	005 Township Road, Daji Street, Caidian District, Wuhan City, Hubei Province	5
114.032	30.5035	428	36	5	Tongcheng Avenue, Daji Street, Caidian District, Wuhan City, Hubei Province	7
114.032	30.5125	92	34	3	Fishing King Base Fishing Field, Daji Street, Caidian District, Wuhan City, Hubei Province	7
114.032	30.5215	215	39	2	Kuoye Honghuo Dragon Fruit Base, Yuxian Street, Caidian District, Wuhan City, Hubei Province	6
114.032	30.5304	38	0	24	Wangjiatai, Yuxian Street, Caidian District, Wuhan City, Hubei Province	7
114.032	30.5394	362	66	44	Building 9 of Yaojialin, Caidian Street, Caidian District, Wuhan City, Hubei Province	8
114.032	30.5484	465	36	4	Wuhan Lingtai Doors and Window Curtain Wall Manufacturing Co., Ltd., Caidian Street, Caidian District, Wuhan City, Hubei Province	7
114.032	30.5574	830	118	38	Wei Curb Automobile Service, Caidian Street, Caidian District, Wuhan City, Hubei Province	8
114.032	30.5664	26003	6352	347	Caidian District Experimental Primary School, Chenggong Avenue, Caidian Street, Caidian District, Wuhan City, Hubei Province	8
114.032	30.5753	43595	7616	1235	Changhong Transportation, Building 3, No. 131, Hanyang Street, Caidian Street, Caidian District, Wuhan City, Hubei Province	9
114.032	30.5843	32658	5721	1122	Zhongbai Warehousing No. 64, Hanyang Street, Caidian Street, Caidian District, Wuhan City, Hubei Province (Caidian Shopping Plaza)	9
114.032	30.5933	4346	1211	57	No. 42, Caijiang Road, Zhangwan Street, Caidian District, Wuhan City, Hubei Province	8
114.032	30.6023	568	148	20	Poliuhong Village, Zhiqing Road, Cihui Street, Dongxihu District, Wuhan City, Hubei Province	8
114.032	30.6113	12	2	4	Wuhan Caidian Home Agricultural Products Professional Cooperative, Zhangwan Street, Caidian District, Wuhan City, Hubei Province	6
114.032	30.6203	1299	163	25	Hui'an Avenue, Zoumaling Street, Dongxihu District, Wuhan City, Hubei Province	8
114.032	30.6292	1650	309	11	Wuhan Rongfa Seasoning Food Co., Ltd., Zoumaling Street, Dongxihu District, Wuhan City, Hubei Province	7
114.032	30.6382	20210	3228	89	Hubei Wugongji Food Co., Ltd., Zoumaling Street, Dongmaling District, Wuhan City, Hubei Province	8
114.032	30.6472	26008	6604	415	Xinggong 12th Road, Zoumaling Street, Dongxihu District, Wuhan City, Hubei Province	8
114.032	30.6562	3052	430	265	Xinyida Large Auto Repair Factory Huitong Highway Port, Zoumaling Street, Dongxihu District, Wuhan City, Hubei Province	8
114.032	30.6652	12491	872	69	Xinggong Jiului Shangjiajing Logistics Park, Zoumaling Street, Dongxihu District, Wuhan City, Hubei Province	8
114.032	30.6741	992	152	6	Xingong 8th Road, Xingou Town, Dongxihu District, Wuhan City, Hubei Province	7
114.032	30.6831	269	86	0	G42 Shanghai-Chengdu Expressway, Xingou Town Street, Dongxihu District, Wuhan City, Hubei Province	5
114.032	30.6921	72	49	2	Dabianhu Village, Xingou Town, Dongxihu District, Wuhan City, Hubei Province	6
114.032	30.7011	290	99	3	Yousha Road, Xingou Town, Dongxihu District, Wuhan City, Hubei Province	7
114.032	30.7101	134	26	0	Huchen West Road, Dongshan Street, Dongshan Street, Donghu District, Wuhan City, Hubei Province	5
114.032	30.7191	47	18	0	Bajialin, Dongshan Street, Dongshan District, Wuhan City, Hubei Province	4
114.032	30.728	28	7	2	Wusi North Road, Dongshan Street, Dongshan District, Donghu District, Wuhan City, Hubei Province	6
114.032	30.737	34	5	0	Wusi North Road, Dongshan Street, Dongshan District, Donghu District, Wuhan City, Hubei Province	3
114.032	30.746	5614	231	3	Huchen Road, Dongshan Street, Dongshan Street, Donghu District, Wuhan City, Hubei Province	7
114.032	30.755	96	29	4	S17 Qiaoxiao Expressway, Dongshan Street, Dongshan District, Wuhan City, Hubei Province	7
114.032	30.764	24	7	0	G4 Beijing-Hong Kong-Macao Expressway, Dongshan Street, Dongshan District, Wuhan City, Hubei Province	3
114.032	30.7729	71	13	15	Dongshantang Christian Church, Dongbai Road, Dongshan Street, Dongshan Street, Dongshan District, Wuhan City, Hubei Province	7
114.032	30.7819	145	14	2	Dongshan Street, Dongshan District, Donghu District, Wuhan City, Hubei Province	6
114.042	30.2251	5	3	0	Haibo Heavy Engineering Technology Co., Ltd., Shamao Street, Hannan District, Wuhan City, Hubei Province (Hannan Branch)	1
114.042	30.234	41	13	8	County No. 029, Shamao Street, Hannan District, Wuhan City, Hubei Province	7
114.042	30.261	29	7	1	Tongfei Avenue, Shamao Street, Hannan District, Wuhan City, Hubei Province	5
114.042	30.27	332	46	0	Xingfuyuan Road, Shamao Street, Hannan District, Wuhan City, Hubei Province	5
114.042	30.2789	1454	157	0	Xingfuyuan Road, Shamao Street, Hannan District, Wuhan City, Hubei Province	6
114.042	30.2879	4693	776	0	Lutes Global Smart Factory, Shamao Street, Hannan District, Wuhan City, Hubei Province (under construction)	6
114.042	30.2969	812	117	27		8
114.042	30.3059	436	63	1	Wuhan Langdi Impeller Machinery Co., Ltd., Shamao Street, Hannan District, Wuhan City, Hubei Province (North Gate)	6
114.042	30.3149	913	133	5	011 Township Road, Dongjing Street, Hannan District, Wuhan City, Hubei Province	7
114.042	30.3239	4788	571	43	Wuhan Railway Bridge Vocational College, Dongjing Street, Hannan District, Wuhan City, Hubei Province	8
114.042	30.3328	831	133	9	No. 82, Mayinghe Avenue, Dongjing Street, Hannan District, Wuhan City, Hubei Province	7
114.042	30.3418	551	51	10	Wuhan Liantou International City Project Department, China Railway Construction Group First Engineering Co., Ltd., Dongjing Street, Hannan District, Wuhan City, Hubei Province	7
114.042	30.3508	844	97	2	Yupei Wuhan Hannan Logistics Park, Dongjing Street, Hannan District, Wuhan City, Hubei Province	7
114.042	30.3598	17	0	0	Jinhebei Road, Dongjing Street, Hannan District, Wuhan City, Hubei Province	1
114.042	30.3688	48	0	0	Northeast Lake, Junshan Street, Caidian District, Wuhan City, Hubei Province	2
114.042	30.3777	396	25	0	089 Township Road, Junshan Street, Caidian District, Wuhan City, Hubei Province	5
114.042	30.3957	77	19	0	Xuejiashan mass fishing ground, Xushan Street, Caidian District, Wuhan City, Hubei Province	4
114.042	30.4047	158	110	4	Parking lot A, Qianzi Starry Cemetery, Qianshan Street, Caidian District, Wuhan City, Hubei Province (entry and exit)	7
114.042	30.4137	701	91	4	Agate 1st Road, Wuhan Changfu Industrial Demonstration Park, Caidian District, Wuhan City, Hubei Province	7
114.042	30.4227	330	86	6	Senlan Biology, Wuhan Changfu Industrial Demonstration Park, Jiukang Avenue, Caidian District, Wuhan City, Hubei Province	7
114.042	30.4316	4078	645	273	Changfu Central Primary School, Changlu Street, Changlu Street, Caidian District, Wuhan City, Hubei Province	8
114.042	30.4406	5175	1019	65	The project department of the China Construction Third Engineering Bureau of Heshan Street, Caidian District, Wuhan City, Hubei Province	8
114.042	30.4496	17768	3525	73	Dadong Community, Yishan Street, Caidian District, Wuhan City, Hubei Province	8
114.042	30.4586	3077	433	19	No. 648, Dadong Community, Yishan Street, Caidian District, Wuhan City, Hubei Province	8
114.042	30.4676	1716	177	17	Meidawang (Wuhan) No. 98 Jiukang Avenue, Daji Street, Caidian District, Wuhan City, Hubei Province	8
114.042	30.4765	7043	1201	102	Changgui Street, Daji Street, Caidian District, Wuhan City, Hubei Province	8
114.042	30.4855	2064	298	0	Wuhan Kaier Environmental Protection Equipment Co., Ltd., Changgui Street, Daji Street, Caidian District, Wuhan City, Hubei Province	6
114.042	30.4945	346	37	6	005 Township Road, Daji Street, Caidian District, Wuhan City, Hubei Province	7
114.042	30.5035	8842	1182	14	Toll station in Daji Street, Caidian District, Wuhan City, Hubei Province (G4 Beijing-Hong Kong-Macao Expressway Exit)	8
114.042	30.5125	2104	328	1	Dajizheng Street, Daji Street, Caidian District, Wuhan City, Hubei Province	7
114.042	30.5215	92	16	7	Kuoye Honghuo Dragon Fruit Base, Daji Street, Caidian District, Wuhan City, Hubei Province	7
114.042	30.5304	68	20	0	Xintangdu, Daji Street, Caidian District, Wuhan City, Hubei Province	4
114.042	30.5394	430	163	1	Yaojiawan, Yuxian Street, Caidian District, Wuhan City, Hubei Province	6
114.042	30.5484	63	3	1	Guoli Village Committee, Caidian Street, Caidian District, Wuhan City, Hubei Province	5
114.042	30.5574	331	85	13	Union Jiangbei Hospital, Chenggong Avenue, Caidian Street, Caidian District, Wuhan City, Hubei Province	7
114.042	30.5664	17297	4858	323	A family of a friend in Caidian Street, Caidian District, Wuhan City, Hubei Province	8
114.042	30.5753	16110	3205	832	Gongnong Road, Lishui Xincheng, Caidian Street, Caidian District, Wuhan City, Hubei Province-Road Parking Space	8
114.042	30.5843	16357	2886	297	Jiangjing Garden, Caidian Street, Caidian District, Wuhan City, Hubei Province	8
114.042	30.5933	1062	149	14	Bibo Pavilion, Cihui Street, Dongxihu District, Wuhan City, Hubei Province	7
114.042	30.6023	175	27	1	Hanjiangdi Road, Cihui Street, Dongxihu District, Wuhan City, Hubei Province	6
114.042	30.6113	145	21	1	Hanjiangdi Road, Zhangwan Street, Caidian District, Wuhan City, Hubei Province	6
114.042	30.6203	854	179	0	Hui'an Avenue, Zoumaling Street, Dongxihu District, Wuhan City, Hubei Province	6
114.042	30.6292	17182	2584	44	Jiexin Avenue, Zoumaling Street, Dongxihu District, Wuhan City, Hubei Province	8
114.042	30.6382	5398	1126	69		8
114.042	30.6472	3270	212	9	Xinggong 12th Road, Zoumaling Street, Dongxihu District, Wuhan City, Hubei Province	7
114.042	30.6562	166	16	18	Building 11, Zuomaling Hetang Community, Zuomaling Street, Dongmaling District, Wuhan City, Hubei Province	7
114.042	30.6652	295	32	9	G4 Beijing-Hong Kong-Macao Expressway, Zoumaling Street, Dongxihu District, Wuhan City, Hubei Province	7
114.042	30.6741	37	7	0	Xinggong 9th Road, Zoumaling Street, Dongxihu District, Wuhan City, Hubei Province	3
114.042	30.6831	106	18	1	G42 Shanghai-Chengdu Expressway, Xingou Town Street, Dongxihu District, Wuhan City, Hubei Province	6
114.042	30.6921	34	24	0	Nanerdougou, Xingou Town, Dongxihu District, Wuhan City, Hubei Province	4
114.042	30.7011	34	16	8	G4 Beijing-Hong Kong-Macao Expressway East-West Lake Service Area, Xingou Town Street, Dongxihu District, Wuhan City, Hubei Province (Beijing-Hong Kong-Macao Expressway Beijing direction) (under construction)	7
114.042	30.7101	309	24	4	Wuhan Real Estate Group Century Construction Supporting Co., Ltd., Yousha Road, Dongshan Street, Dongshan Street, Donghu District, Wuhan City, Hubei Province	7
114.042	30.7191	132	15	1	Wusi South Road, Dongshan Street, Dongshan District, Donghu District, Wuhan City, Hubei Province	6
114.042	30.728	753	173	3	G4 Beijing-Hong Kong-Macao Expressway, Dongshan Street, Dongshan District, Wuhan City, Hubei Province	7
114.042	30.737	43	2	0	G4 Beijing-Hong Kong-Macao Expressway, Dongshan Street, Dongshan District, Wuhan City, Hubei Province	3
114.042	30.746	130	15	2	Huchen Road, Dongshan Street, Dongshan Street, Donghu District, Wuhan City, Hubei Province	6
114.042	30.755	62	12	0	S17 Qiaoxiao Expressway, Dongshan Street, Dongshan District, Wuhan City, Hubei Province	4
114.042	30.764	12	0	1	G4 Beijing-Hong Kong-Macao Expressway, Dongshan Street, Dongshan District, Wuhan City, Hubei Province	4
114.042	30.7729	105	20	2	Dongshan Puti Picking Garden, Dongbai Road, Dongshan Street, Dongshan District, Wuhan City, Hubei Province	6
114.042	30.7819	21	3	1	Weidi, Dongshan Street, Dongshan District, Wuhan City, Hubei Province, Hubei Xiaogan Zhuhu National Wetland Park	5
114.053	30.2071	4	0	1	United Village, Jinkou Street, Jinkou Street, Jiangxia District, Wuhan City, Hubei Province	3
114.053	30.2161	45	2	0	Shuangyao, Jingang New District, Jiangxia District, Wuhan City, Hubei Province	3
114.053	30.234	12	0	3	Dazui Village Committee, Shamao Street, Hannan District, Wuhan City, Hubei Province	5
114.053	30.243	5	0	1	Wuhan Jiangbeizui Farm Rural Tour Co., Ltd., Shamao Street, Hannan District, Wuhan City, Hubei Province	3
114.053	30.252	493	111	0	Tongfei Avenue, Shamao Street, Hannan District, Wuhan City, Hubei Province	5
114.053	30.261	20	4	0	Tongfei Avenue, Shamao Street, Hannan District, Wuhan City, Hubei Province	3
114.053	30.27	1644	164	0	Tongjiang 4th Road, Shamao Street, Hannan District, Wuhan City, Hubei Province	6
114.053	30.2789	4868	293	7	Xingfuyuan Road, Shamao Street, Hannan District, Wuhan City, Hubei Province	7
114.053	30.2879	1545	170	30	Ryushun Logistics (Wuhan) Innovation Industrial Park, Xingfuyuan Road, Shamao Street, Hannan District, Wuhan City, Hubei Province	8
114.053	30.2969	1128	112	61	Wuhan Huanghe Tractor Manufacturing Co., Ltd., No. 600 Xingfuyuan Road, Shamao Street, Hannan District, Wuhan City, Hubei Province	8
114.053	30.3059	31322	1599	46	Tianyuan Environmental Protection, Shamao Street, Hannan District, Wuhan City, Hubei Province	8
114.053	30.3149	3151	172	12	Wuhan Guangjia Auto Parts Co., Ltd., No. 518, Weihu Road, Shamao Street, Hannan District, Wuhan City, Hubei Province	8
114.053	30.3239	3917	469	73	Wuhan Abward Food Co., Ltd., Yucai Road, Dongjing Street, Hannan District, Wuhan City, Hubei Province	8
114.053	30.3328	4676	950	2	No. 39, Mayinghe Avenue, Dongjing Street, Hannan District, Wuhan City, Hubei Province	7
114.053	30.3418	2712	335	56	Wuhan Xinhedong Glass Co., Ltd., Dongjing Street, Hannan District, Wuhan City, Hubei Province Wuhan Province Wuhan Grinsongzheng Cable Co., Ltd.	8
114.053	30.3508	420	78	6	Yupei Wuhan Hannan Logistics Park, Dongjing Street, Hannan District, Wuhan City, Hubei Province	7
114.053	30.3598	126	25	0	Xiashanhu Road, Junshan Street, Caidian District, Wuhan City, Hubei Province	4
114.053	30.3688	7	0	0	089 Township Road, Junshan Street, Caidian District, Wuhan City, Hubei Province	0
114.053	30.3777	11	0	0	Guanlianhu Aquatic Products Co., Ltd., Huangshan Street, Caidian District, Wuhan City, Hubei Province	0
114.053	30.3867	8	0	0	Guanlian Lake, Qianshan Street, Caidian District, Wuhan City, Hubei Province	0
114.053	30.3957	31	5	0	Huangling Avenue, Junshan Street, Caidian District, Wuhan City, Hubei Province	3
114.053	30.4047	816	96	7	Wuhan Jinfa Technology Co., Ltd., Junshan Street, Caidian District, Wuhan City, Hubei Province (Ximen)	7
114.053	30.4137	2621	123	23	Changhuan Avenue, Junshan Street, Caidian District, Wuhan City, Hubei Province	8
114.053	30.4227	1189	166	16	Wuhan Guanghui Mait Changfu Industrial Park, No. 101 Changjun Street, Wuhan Changfu Industrial Demonstration Park, Caidian District, Wuhan City, Hubei Province	8
114.053	30.4316	4186	688	154	Wuhan Zhongkun Lighting Technology Development Co., Ltd., No. 64, Jiukang Avenue, Wuhan Changfu Industrial Demonstration Park, Caidian District, Wuhan City, Hubei Province	8
114.053	30.4406	10272	2836	77	No. 209 Changfu Street, Changfu Industrial Demonstration Park, Caidian District, Wuhan City, Hubei Province Weihua Aluminum Co., Ltd.	8
114.053	30.4496	60942	15473	307	People's Wanfu (Wuhan) Headquarters Economic Park (under construction)	8
114.053	30.4586	7700	1516	72	G50 Shanghai-Chongqing Expressway, Huangshan Street, Caidian District, Wuhan City, Hubei Province	8
114.053	30.4676	514	66	32	G4 Beijing-Hong Kong-Macao Expressway, Daji Street, Caidian District, Wuhan City, Hubei Province	8
114.053	30.4765	604	218	47	Gaobang Industrial Park, Zhulin 1st Road, Daji Street, Caidian District, Wuhan City, Hubei Province	8
114.053	30.4855	85	2	1	Xiao Zhouzun, Daji Street, Caidian District, Wuhan City, Hubei Province	5
114.053	30.4945	530	150	18	Daquan Road, Daji Street, Caidian District, Wuhan City, Hubei Province	8
114.053	30.5035	15518	2238	603	Jusheng Modern City, Swan Lake Avenue, Daji Street, Caidian District, Wuhan City, Hubei Province	8
114.053	30.5125	4051	427	6	Daji Street Office, Zhongling Road, Daji Street, Caidian District, Wuhan City, Hubei Province	7
114.053	30.5215	24	2	1	Zhaowangwan, Daji Street, Caidian District, Wuhan City, Hubei Province	5
114.053	30.5304	23	16	2	Houguanhu Greenway, Daji Street, Caidian District, Wuhan City, Hubei Province	6
114.053	30.5394	11	0	2	Caidian Service Area, Jiashui District, Caidian Service Area, Daji Street, Caidian District, Wuhan City, Hubei Province (Beijing-Hong Kong-Macao Expressway)	5
114.053	30.5484	41	23	1	Houguanhu Greenway, Yuxian Street, Caidian District, Wuhan City, Hubei Province	5
114.053	30.5574	1492	297	29	G4 Beijing-Hong Kong-Macao Expressway, Caidian Street, Caidian District, Wuhan City, Hubei Province	8
114.053	30.5664	21408	3838	112	G4 Beijing-Hong Kong-Macao Expressway, Caidian Street, Caidian District, Wuhan City, Hubei Province	8
114.053	30.5753	5331	1280	86	Hanjin Avenue, Caidian Street, Caidian District, Wuhan City, Hubei Province	8
114.053	30.5843	1311	172	12	Xianghenan Road, Caidian Street, Caidian District, Wuhan City, Hubei Province	7
114.053	30.5933	611	139	18	Liujia Taipei Road, Cihui Street, Dongxihu District, Wuhan City, Hubei Province	8
114.053	30.6023	135	7	2	G4 Beijing-Hong Kong-Macao Expressway, Cihui Street, Dongxihu District, Wuhan City, Hubei Province	6
114.053	30.6113	802	128	2	Shengxin Carriage Factory, Zoumaling Street, Dongxihu District, Wuhan City, Hubei Province	7
114.053	30.6203	3642	490	194	Jincheng Ceramics City, Zoumaling Street, Dongxihu District, Wuhan City, Hubei Province	8
114.053	30.6292	28486	5441	340	Wanguo Street, Changqing Street, Dongxihu District, Wuhan City, Hubei Province	8
114.053	30.6382	5626	586	24	Lucheng Logistics Youtu Logistics Park, Zoumaling Street, Dongmaling District, Wuhan City, Hubei Province	8
114.053	30.6472	612	81	8	Project Department of the 6th Standard Project of Beijing, Hong Kong and Macau Renovation and Expansion Project of Shuichang Road, Zoumaling Street, Dongmaling District, Wuhan City, Hubei Province	7
114.053	30.6562	5	1	0	G4 Beijing-Hong Kong-Macao Expressway, Zoumaling Street, Dongxihu District, Wuhan City, Hubei Province	1
114.053	30.6652	137	13	2	Sanqiao Village, Zoumaling Street, Dongxihu District, Wuhan City, Hubei Province	6
114.053	30.6741	29	12	3	Yusong Village, Zoumaling Street, Dongxihu District, Wuhan City, Hubei Province	6
114.053	30.6831	74	16	0	G42 Shanghai-Chengdu Expressway, Baiquan Street, Dongxihu District, Wuhan City, Hubei Province	4
114.053	30.6921	4	4	0	Nanerdougou, Xingou Town, Dongxihu District, Wuhan City, Hubei Province	2
114.053	30.7011	12	1	0	Wuqi1 Road, Dongshan Street, Dongshan District, Donghu District, Wuhan City, Hubei Province	1
114.053	30.7101	199	34	9	Yousha Road, Dongshan Street, Dongshan Street, Donghu District, Wuhan City, Hubei Province	7
114.053	30.7191	234	61	1	Zhang Wanjin Fishing Center, Dongshan Street, Dongshan District, Wuhan City, Hubei Province	6
114.053	30.728	124	8	9	Huchen Road, Dongshan Street, Dongshan District, Wuhan City, Hubei Province You Can't Help·Guangrong Grape Picking Garden	7
114.053	30.737	118	30	3	Gege Ecological Farm, Dongshan Street, Dongshan District, Wuhan City, Hubei Province	7
114.053	30.746	45	7	1	Huchen Road, Dongshan Street, Dongshan Street, Donghu District, Wuhan City, Hubei Province	5
114.053	30.755	15	3	0	S17 Qiaoxiao Expressway, Dongshan Street, Dongshan District, Wuhan City, Hubei Province	2
114.053	30.764	122	33	4	Dongbai Road, Dongshan Street, Dongshan District, Wuhan City, Hubei Province	7
114.053	30.7729	152	46	7	Dongbai Road, Dongshan Street, Dongshan District, Wuhan City, Hubei Province	7
114.053	30.7819	3	0	0	Lunhe, Dongshan Street, Dongshan District, Wuhan City, Hubei Province	0
114.063	30.2161	106	3	0	Wuhan Nan'an No. 1 Ecological Agriculture Technology Co., Ltd., Jinkou Street, Jiangxia District, Wuhan City, Hubei Province	3
114.063	30.2251	40	8	0	Xiasha Lake, Shamao Street, Hannan District, Wuhan City, Hubei Province	3
114.063	30.234	18	6	0	Shamadi, Shama Street, Hannan District, Wuhan City, Hubei Province	3
114.063	30.252	15	2	13	Tong Navigation Avenue, Shamao Street, Hannan District, Wuhan City, Hubei Province	7
114.063	30.261	10	0	0	Tong Navigation Avenue, Shamao Street, Hannan District, Wuhan City, Hubei Province	0
114.063	30.27	108	16	7	Shama Avenue, Shama Street, Hannan District, Wuhan City, Hubei Province	7
114.063	30.2789	974	151	15		8
114.063	30.2879	2922	88	5	Tongjiang 1st Road, Shamao Street, Hannan District, Wuhan City, Hubei Province	7
114.063	30.2969	3025	235	36	Tongjiang 1st Road, Shamao Street, Hannan District, Wuhan City, Hubei Province	8
114.063	30.3059	9993	1184	33	Yucai Second Primary School, Mayinghe East Road, Shamao Street, Hannan District, Wuhan City, Hubei Province	8
114.063	30.3149	10586	1881	152	Li Tian Tingrui Park, Shamao Street, Hannan District, Wuhan City, Hubei Province	8
114.063	30.3239	3469	1033	28	Yifei Home Furnishings, Shamao Street, Hannan District, Wuhan City, Hubei Province (Country Garden Phoenix Bay Store) Country Garden Phoenix Bay	8
114.063	30.3328	6873	2409	96	Greenland Ouzhen Style Street, Mayinghe Avenue, Dongjing Street, Hannan District, Wuhan City, Hubei Province	8
114.063	30.3418	3577	526	29	S13 Wuhan Supervisory Expressway, Dongjing Street, Hannan District, Wuhan City, Hubei Province	8
114.063	30.3508	921	190	0	013 Township Road, Dongjing Street, Hannan District, Wuhan City, Hubei Province	6
114.063	30.3598	16	6	0	Xiashanhu Road, Dongjing Street, Hannan District, Wuhan City, Hubei Province	3
114.063	30.3688	46	8	0	Xiashanhu Road, Junshan Street, Caidian District, Wuhan City, Hubei Province	3
114.063	30.3777	68	8	0	Hengshan, Junshan Street, Caidian District, Wuhan City, Hubei Province	4
114.063	30.3867	36	0	0	Dazhaoshan, Junshan Street, Caidian District, Wuhan City, Hubei Province	1
114.063	30.3957	170	16	2	Guanlianhu Road, Junshan Street, Caidian District, Wuhan City, Hubei Province	6
114.063	30.4047	6235	741	10	Dongfeng Nissan, Fengting 5th Road, Junshan Street, Caidian District, Wuhan City, Hubei Province	8
114.063	30.4137	377	58	12	Dongfeng Nissan, Fengting South Road, Junshan Street, Caidian District, Wuhan City, Hubei Province	7
114.063	30.4227	2213	375	50	Wuhan Mingyang Phase II Park, No. 59, Longwang 2nd Road, Wuhan Changfu Industrial Demonstration Park, Caidian District, Wuhan City, Hubei Province	8
114.063	30.4316	1657	259	86	Wuhan Mingyang Phase II Park, No. 11, Xiniu Er Street, Wuhan Changfu Industrial Demonstration Park, Caidian District, Wuhan City, Hubei Province	8
114.063	30.4406	2244	303	78	Yihe Holdings (Wuhan) Science and Technology Industrial Park, Changfu Industrial Demonstration Park, Longwang 2nd Road, Caidian District, Wuhan City, Hubei Province	8
114.063	30.4496	4886	711	317	G4 Beijing-Hong Kong-Macao Expressway, Chuanyang Street, Caidian District, Wuhan City, Hubei Province	8
114.063	30.4586	3944	805	31	Hubei Transportation Investment Wuhan West Toll Station, Chuanyang Street, Caidian District, Wuhan City, Hubei Province (G4 Beijing-Hong Kong-Macao Expressway Exit)	8
114.063	30.4676	516	85	2	Pengwan, Daji Street, Caidian District, Wuhan City, Hubei Province	7
114.063	30.4765	189	33	1	G4 Beijing-Hong Kong-Macao Expressway, Daji Street, Caidian District, Wuhan City, Hubei Province	6
114.063	30.4855	162	19	3	Ground parking lot (entry and exit) in Daji Street, Caidian District, Wuhan City, Hubei Province	7
114.063	30.4945	337	60	2	Daquan Road, Daji Street, Caidian District, Wuhan City, Hubei Province	7
114.063	30.5035	1177	221	99	District F, Lianxi Community, Lianxi Street, Daji Street, Caidian District, Wuhan City, Hubei Province	8
114.063	30.5125	1957	181	7	Xiangtong FRP Manufacturing Co., Ltd., Daji Street, Caidian District, Wuhan City, Hubei Province	7
114.063	30.5215	15	2	0	Nenzhang Wan, Daji Street, Caidian District, Wuhan City, Hubei Province	2
114.063	30.5304	761	143	1	Houguanhu Greenway, Yuxian Street, Caidian District, Wuhan City, Hubei Province	7
114.063	30.5394	194	90	5	Dried Yuzui, Yuxian Street, Caidian District, Wuhan City, Hubei Province	7
114.063	30.5484	4203	1118	24	Houguanhu Greenway, Yuxian Street, Caidian District, Wuhan City, Hubei Province	8
114.063	30.5574	1333	187	17	S15 Hancai Expressway, Caidian Street, Caidian District, Wuhan City, Hubei Province	8
114.063	30.5664	10578	2286	188	Fenghuangshan Development Zone, Caidian Street, Caidian District, Wuhan City, Hubei Province	8
114.063	30.5753	2194	650	58	Jindachang shelves and storage equipment, Fenghuang Road, Caidian Street, Caidian District, Wuhan City, Hubei Province	8
114.063	30.5843	2799	283	31	General contracting EPC Project Department of the third phase expansion project of Caidian District Sewage Treatment Plant, Caidian Street, Caidian District, Wuhan City, Hubei Province	8
114.063	30.5933	134	28	15	Huinong Road, Cihui Street, Dongxihu District, Wuhan City, Hubei Province	7
114.063	30.6023	710	74	9	Hui'an Avenue Fu Road, Cihui Street, Dongxihu District, Wuhan City, Hubei Province	7
114.063	30.6113	399	203	17	Wujiashan Base, Wujiashan Base, Cihui Street, Dongxihu District, Wuhan City, Hubei Province China Railway Special Goods Wujiashan Logistics Base	8
114.063	30.6203	5467	730	337	Wuhan Kaiyuan Speed ​​Logistics Park, Gaoqiao 5th Road, Changqing Street, Dongxihu District, Wuhan City, Hubei Province	8
114.063	30.6292	15911	3082	404	Wuhan Haosheng Warehousing Co., Ltd., No. 27, Gaoqiao 3rd Road, Changqing Street, Dongxihu District, Wuhan City, Hubei Province	8
114.063	30.6382	5631	669	31	Dongwu Avenue, Changqing Street, Dongxihu District, Wuhan City, Hubei Province	8
114.063	30.6472	10	0	1	Wuhan Hanfu Concrete Co., Ltd., Zoumaling Street, Dongxihu District, Wuhan City, Hubei Province	4
114.063	30.6562	7	0	0	Aquatic products village, Zoumaling Street, Dongxihu District, Wuhan City, Hubei Province	0
114.063	30.6652	79	9	1	Yinhu Road, Zoumaling Street, Dongxihu District, Wuhan City, Hubei Province	5
114.063	30.6741	62	9	2	Yinhu Road, Zoumaling Street, Dongxihu District, Wuhan City, Hubei Province	6
114.063	30.6831	34	7	0	G42 Shanghai-Chengdu Expressway, Baiquan Street, Dongxihu District, Wuhan City, Hubei Province	3
114.063	30.6921	26	8	0	G42 Shanghai-Chengdu Expressway, Baiquan Street, Dongxihu District, Wuhan City, Hubei Province	3
114.063	30.7011	137	15	0	Liantonghu Brigade, Dongshan Street, Dongshan Lake District, Wuhan City, Hubei Province	4
114.063	30.7101	44	0	5	Wuhan Changshun Ecological Agriculture Development Co., Ltd., Yousha Road, Dongshan Street, Dongshan District, Wuhan City, Hubei Province	6
114.063	30.7191	32	2	1	Huyuan Road, Dongshan Street, Dongshan Street, Donghu District, Wuhan City, Hubei Province	5
114.063	30.728	63	15	6	Haofang Farmhouse, Dongshan Street, Dongshan District, Donghu District, Wuhan City, Hubei Province	7
114.063	30.737	540	112	14	Huyuan Road, Dongshan Street, Dongshan Street, Donghu District, Wuhan City, Hubei Province	7
114.063	30.746	88	24	0	Huyuan Road, Dongshan Street, Dongshan Street, Donghu District, Wuhan City, Hubei Province	4
114.063	30.755	224	44	2	Dongbai Road, Dongshan Street, Dongshan District, Wuhan City, Hubei Province	7
114.063	30.764	401	28	3	Wanyuan Learning Drive, Dongshan Street, Dongshan District, Donghu District, Wuhan City, Hubei Province (Wuhan Branch)	7
114.063	30.7729	74	52	1	Dongshan Street, Dongshan District, Donghu District, Wuhan City, Hubei Province	6
114.063	30.7819	9	2	0	Weidi, Dongshan Street, Dongshan District, Wuhan City, Hubei Province, Hubei Xiaogan Zhuhu National Wetland Park	2
114.073	30.2071	5	3	1	Hetang Manor, Jinkou Street, Jiangxia District, Wuhan City, Hubei Province	4
114.073	30.2161	234	4	1	Wuhan Nan'an No. 1 Ecological Agriculture Technology Co., Ltd., Jinkou Street, Jiangxia District, Wuhan City, Hubei Province	5
114.073	30.2251	1343	43	2	Xiasha Lake, Jinkou Street, Jiangxia District, Wuhan City, Hubei Province	7
114.073	30.234	496	11	0	Xiasha Lake, Jingang New District, Jiangxia District, Wuhan City, Hubei Province	5
114.073	30.243	1	0	0	Provincial Road 102, Jingang New District Street, Jiangxia District, Wuhan City, Hubei Province	0
114.073	30.252	10	2	0	Wuhan Hannan General Aviation Airport, Shamao Street, Hannan District, Wuhan City, Hubei Province	2
114.073	30.261	10	2	0	Wuhan Hannan General Aviation Airport, Shamao Street, Hannan District, Wuhan City, Hubei Province	2
114.073	30.27	38	10	7	Wuhan Hannan General Aviation Airport, Xingfu Middle Road, Shamao Street, Hannan District, Wuhan City, Hubei Province	7
114.073	30.2789	301	14	8	Weihunan Road, Shamao Street, Hannan District, Wuhan City, Hubei Province	7
114.073	30.2879	4215	227	8	Xingcheng Avenue, Shamao Street, Hannan District, Wuhan City, Hubei Province	7
114.073	30.2969	563	134	84	Building 8, Jiamin Hannan Logistics Park, Shamao Street, Hannan District, Wuhan City, Hubei Province	8
114.073	30.3059	16187	3626	460	Yucai Road, Shamao Street, Hannan District, Wuhan City, Hubei Province	8
114.073	30.3149	20329	3055	163	No. 519, Shamaozheng Street, Shamao Street, Hannan District, Wuhan City, Hubei Province	8
114.073	30.3239	10454	1637	20	Wuhan Hannan No. 1 Middle School, Shamao Street, Hannan District, Wuhan City, Hubei Province	8
114.073	30.3328	5449	1053	37	Mayinghe East Road, Dongjing Street, Hannan District, Wuhan City, Hubei Province	8
114.073	30.3418	1253	120	6	Niuhai Lake Bridge, Dongjing Street, Hannan District, Wuhan City, Hubei Province	7
114.073	30.3508	5409	854	2	S13 Wuhan Supervisory Expressway, Dongjing Street, Hannan District, Wuhan City, Hubei Province	7
114.073	30.3598	494	64	0	013 Township Road, Dongjing Street, Hannan District, Wuhan City, Hubei Province	5
114.073	30.3688	16	0	0	Guanshan, Junshan Street, Caidian District, Wuhan City, Hubei Province	1
114.073	30.3777	72	1	0	Zengjia Dashan, Junshan Street, Caidian District, Wuhan City, Hubei Province	3
114.073	30.3867	138	21	0	Guanlianhu Road, Junshan Street, Caidian District, Wuhan City, Hubei Province	4
114.073	30.3957	941	83	14	Yuehu No. 1, Junshan Street, Caidian District, Wuhan City, Hubei Province (under construction)	7
114.073	30.4047	5302	598	165	Putan Community, Lingfeng Road, Junshan Street, Caidian District, Wuhan City, Hubei Province	8
114.073	30.4137	13135	1111	31	Dongfeng Nissan, No. 6, Fengting 3rd Road, Junshan Street, Caidian District, Wuhan City, Hubei Province	8
114.073	30.4227	2605	471	69	Wuhan Dingzhan New Materials Technology Co., Ltd., Huangheling, Junshan Street, Caidian District, Wuhan City, Hubei Province	8
114.073	30.4316	728	127	16	No. 43, Longwang 2nd Road, Wuhan Changfu Industrial Demonstration Park, Caidian District, Wuhan City, Hubei Province	8
114.073	30.4406	3701	522	133	Zhushanhu Avenue, Chuankou Street, Caidian District, Wuhan City, Hubei Province	8
114.073	30.4496	5343	561	51	Dongfeng Passenger Vehicle Company, Chuanyang Street, Caidian District, Wuhan City, Hubei Province	8
114.073	30.4586	14823	3568	95	No. 185, Quanli North Road, Chuanyang Street, Caidian District, Wuhan City, Hubei Province	8
114.073	30.4676	11111	608	23	Houguanqu South Road, Chuanyang Street, Caidian District, Wuhan City, Hubei Province	8
114.073	30.4765	675	67	3	Wenling Village, Daji Street, Caidian District, Wuhan City, Hubei Province	7
114.073	30.4855	2964	234	72	Wuhan Huabohui (South Gate) in Daji Street, Caidian District, Wuhan City, Hubei Province	8
114.073	30.4945	1713	292	34	Wuhan Flower Bohui, Zhiyinqiao, Daji Street, Caidian District, Wuhan City, Hubei Province	8
114.073	30.5035	830	194	7	Dadun South Road, Daji Street, Caidian District, Wuhan City, Hubei Province	7
114.073	30.5125	1372	168	10	No. 142, Xiaojizheng Street, Daji Street, Caidian District, Wuhan City, Hubei Province	7
114.073	30.5215	893	130	4	Zhangbao Primary School, Daji Street, Caidian District, Wuhan City, Hubei Province	7
114.073	30.5304	95	26	5	Lujiashan, Daji Street, Caidian District, Wuhan City, Hubei Province	7
114.073	30.5394	462	74	19	Wuxian Road, Ecologically Livable New City, Caidian District, Wuhan City, Hubei Province	7
114.073	30.5484	1221	201	15	Houguanhu Ecological Livable New Town Wuxian Road Houguanhu National Wetland Park, Caidian District, Wuhan City, Wuhan City, Hubei Province	8
114.073	30.5574	1033	272	17	Houguanhu National Wetland Park, Xintian Avenue, Caidian Street, Caidian District, Wuhan City, Hubei Province	8
114.073	30.5664	6315	890	57	Liwan, Caidian Street, Caidian District, Wuhan City, Hubei Province	8
114.073	30.5753	541	172	19	Qintai Avenue, Caidian Street, Caidian District, Wuhan City, Hubei Province	8
114.073	30.5843	844	155	0	Building 12, Zhongfa Impression, Hanshui New Town, Caidian Street, Caidian District, Wuhan City, Hubei Province	6
114.073	30.5933	3952	706	4	Xianghenan Road, Caidian Street, Caidian District, Wuhan City, Hubei Province	7
114.073	30.6023	3239	261	34	China Railway Special Goods Wujiashan Logistics Base, Wujiashan Freight Farm, Cihui Street, Dongxihu District, Wuhan City, Hubei Province	8
114.073	30.6113	1705	207	32	No. 690, Gexin Avenue, Changqing Street, Dongxihu District, Wuhan City, Hubei Province	8
114.073	30.6203	4165	646	229	Hubei Transportation Logistics Co., Ltd., Xincheng 20th Road, Changqing Street, Dongxihu District, Wuhan City, Hubei Province	8
114.073	30.6292	12513	1630	208	Jincheng International Stone City, Tianyuan Street, Changqing Street, Dongxihu District, Wuhan City, Hubei Province	8
114.073	30.6382	7783	255	33	Wuhan Gangying Science and Technology Park, Wujin Road, Changqing Street, Dongxihu District, Wuhan City, Hubei Province	8
114.073	30.6472	136	28	0	Xinjian Village, Changqing Street, Dongxihu District, Wuhan City, Hubei Province	5
114.073	30.6562	22	10	1	Lianghualan Road, Zoumaling Street, Dongxihu District, Wuhan City, Hubei Province	5
114.073	30.6652	20	0	2	Zhuxin Road, Zoumaling Street, Dongxihu District, Wuhan City, Hubei Province	5
114.073	30.6741	164	34	2	Building 2, Xiaohu Village, Zoumaling Street, Dongxihu District, Wuhan City, Hubei Province	6
114.073	30.6831	24	6	0	Fishing ground in Xiaohu Village, Baiquan Street, Dongxihu District, Wuhan City, Hubei Province	3
114.073	30.6921	48	9	1	G42 Shanghai-Chengdu Expressway, Baiquan Street, Dongxihu District, Wuhan City, Hubei Province	5
114.073	30.7011	136	21	5	Fenjiegou Road, Baiquan Street, Dongxihu District, Wuhan City, Hubei Province	7
114.073	30.7101	255	13	1	Hongwei Road, Baiquan Street, Dongxihu District, Wuhan City, Hubei Province	6
114.073	30.7191	129	16	3	Huyuan Road, Baiquan Street, Dongxihu District, Wuhan City, Hubei Province	7
114.073	30.728	107	24	0	Xingou Exit, Baiquan Street, Dongxihu District, Wuhan City, Hubei Province (Southeastward of S17 Qiaoxiao Expressway)	4
114.073	30.737	28	2	3	Dongbai Road, Dongshan Street, Dongshan District, Wuhan City, Hubei Province	6
114.073	30.746	177	51	12	Wuhan Julonghu Ecological Park, Dongshan Street, Dongshan District, Wuhan City, Hubei Province	7
114.073	30.755	139	33	5	Dongbai Road, Dongshan Street, Dongshan District, Wuhan City, Hubei Province	7
114.073	30.764	8	2	2	Dongshan Subject Four Examination Room, Dongshan Street, Dongshan District, Wuhan City, Hubei Province	5
114.073	30.7729	110	79	0	Dongshan Street, Dongshan District, Donghu District, Wuhan City, Hubei Province	5
114.084	30.2071	11	2	0	Hubei Zilong Paint Technology Co., Ltd., Jinkou Street, Jiangxia District, Wuhan City, Hubei Province	2
114.084	30.2161	3	0	0	Wuhan Yili Paint Co., Ltd., Jinkou Street, Jiangxia District, Wuhan City, Hubei Province	0
114.084	30.2251	20	0	48	Jiuquti Road, Jinshui Street, Jiangxia District, Wuhan City, Hubei Province	7
114.084	30.234	106	5	7	Provincial Road 102, Jingang New District Street, Jiangxia District, Wuhan City, Hubei Province	7
114.084	30.243	97	4	0	Provincial Road 102, Jingang New District Street, Jiangxia District, Wuhan City, Hubei Province	3
114.084	30.252	55	5	0	Zhongwan Village Committee, Jingang New District Street, Jiangxia District, Wuhan City, Hubei Province	3
114.084	30.2789	7	0	2	Tong Navigation Avenue, Shamao Street, Hannan District, Wuhan City, Hubei Province	5
114.084	30.2879	34	24	3	Zhuopang Science and Technology Park, Tongneng Avenue, Shamao Street, Hannan District, Wuhan City, Hubei Province	6
114.084	30.2969	188	94	4	Ideal Family Talent Apartment, Shamao Street, Hannan District, Wuhan City, Hubei Province (under renovation) Zhuopang Science and Technology Park	7
114.084	30.3059	2681	1122	997	Zanhong Shopping Plaza, No. 551, Shamaozheng Street, Shamao Street, Hannan District, Wuhan City, Hubei Province	9
114.084	30.3149	11820	2451	866	Left Bank Phoenix City, Shamao Street, Hannan District, Wuhan City, Hubei Province	8
114.084	30.3239	6816	1177	546	Yuyuan Road, Shamao Street, Hannan District, Wuhan City, Hubei Province	8
114.084	30.3328	19549	4242	159	Huading Industrial Park (Xingsan Road) in Shamao Street, Hannan District, Wuhan City, Hubei Province	8
114.084	30.3418	1332	223	54	Mayinghe East Road, Mayinghe East Road, Shamao Street, Hannan District, Wuhan City, Hubei Province-Road Parking Space	8
114.084	30.3508	9068	2084	158	Cuidi Chunxiao, Dongjing Street, Hannan District, Wuhan City, Hubei Province (North of Hualinyuan on the River)	8
114.084	30.3598	2498	380	0	No. 53, Qianyuewan 10th Street, Wuhan Country Garden, Hannan District, Wuhan City, Hubei Province	6
114.084	30.3688	294	62	0	No. 71, Qianyuewan Second Street, Wuhan Country Garden, Dongjing Street, Hannan District, Wuhan City, Hubei Province	5
114.084	30.3777	16	3	0	Zhumu Lake, Junshan Street, Caidian District, Wuhan City, Hubei Province	2
114.084	30.3867	1421	170	1	Guanlianhu Road, Junshan Street, Caidian District, Wuhan City, Hubei Province	7
114.084	30.3957	95	13	0	Mao Shi Line, Junshan Street, Caidian District, Wuhan City, Hubei Province	4
114.084	30.4047	2885	348	114	No. 109, Huangling Street, Junshan Street, Caidian District, Wuhan City, Hubei Province	8
114.084	30.4137	567	74	68	Wuhan Sihaoyanpei Boarding Postgraduate Entrance Examination School Junshan Entrepreneurship Park, Junshan Street, Caidian District, Wuhan City, Hubei Province	8
114.084	30.4227	5184	519	41	G4 Beijing-Hong Kong-Macao Expressway, Junshan Street, Caidian District, Wuhan City, Hubei Province	8
114.084	30.4316	136	14	8	Zhushan (tram station) in Junshan Street, Caidian District, Wuhan City, Hubei Province	7
114.084	30.4406	1259	128	15	R&D General Institute of Dongling Village Dongfeng Automobile Group Co., Ltd., Chuanyang Street, Caidian District, Wuhan City, Hubei Province	8
114.084	30.4496	4982	840	28	Zhushanhu Avenue Economic Development·Intelligent Manufacturing 2045 Innovation Valley, Zhushanhu Avenue, Chuanyang Street, Caidian District, Wuhan City, Hubei Province	8
114.084	30.4586	11335	1075	59	Guanhuyuan, Wuhan Business School, Chuanyang Street, Caidian District, Wuhan City, Hubei Province North District	8
114.084	30.4676	13698	1814	13	Houguanhu Greenway, Houguanhu South Road, Chuanyang Street, Caidian District, Wuhan City, Hubei Province	8
114.084	30.4765	979	85	4	Fengxiang Island Resort, Chuanyang Street, Caidian District, Wuhan City, Hubei Province	7
114.084	30.4855	2348	301	8	Shimao Longwan Parking Lotte, Daji Street, Caidian District, Wuhan City, Hubei Province	7
114.084	30.4945	3220	560	5	Daji Street, Caidian District, Wuhan City, Hubei Province just happened to camp GOHOME	7
114.084	30.5035	4191	938	67	Phase 3 of Shimao Longwan, Dadun South Road, Daji Street, Caidian District, Wuhan City, Hubei Province	8
114.084	30.5125	2968	593	9	No. 157, Swan Lake Avenue, Daji Street, Caidian District, Wuhan City, Hubei Province	7
114.084	30.5215	395	52	9	Caiyun Road, Daji Street, Caidian District, Wuhan City, Hubei Province	7
114.084	30.5304	3562	722	42	Houguanhu Greenway, Caidian District, Wuhan City, Hubei Province	8
114.084	30.5394	2628	445	18	Hubei Province, Caidian District, Caidian District, Wuhan City, Hubei Province, Ecological Livable New City, Hehuang West Road	8
114.084	30.5484	806	208	17	Wuhan Caidian District, Wuhan City, Hubei Province Houguanhu Ecological Livable New City Wuhan Yuhao Hengye Exhibition and Exhibition Co., Ltd.	8
114.084	30.5574	3572	516	134	Wuhan Zhiyincheng is also built in the second phase of the Houguanhu ecological livable new city in Caidian District, Wuhan City, Hubei Province	8
114.084	30.5664	667	252	37	Caidian District, Wuhan City, Hubei Province, Houguanhu Ecological Livable New City S15 Hancai Expressway	8
114.084	30.5753	286	51	2	Zhaojiapo, Caidian Street, Caidian District, Wuhan City, Hubei Province	7
114.084	30.5843	1643	425	14	Ehan Anju Putty Powder Factory, Caidian Street, Caidian District, Wuhan City, Hubei Province	8
114.084	30.5933	1284	356	17	Maritime wharf in East and West Lake District, Zhangwan Street, Caidian District, Wuhan City, Hubei Province	8
114.084	30.6023	4779	345	52	Hujiaqi Road, Cihui Street, Dongxihu District, Wuhan City, Hubei Province	8
114.084	30.6113	3803	382	7	TCL Air Conditioning Wuhan Intelligent Manufacturing Industrial Park, TCL Air Conditioning, Changqing Street, Dongxihu District, Wuhan City, Hubei Province (under construction)	7
114.084	30.6203	6229	608	168	No. 5489, Donghu Avenue, Changqing Street, Donghu District, Wuhan City, Hubei Province Jiuzhoutong Pharmaceutical Group Logistics Co., Ltd.	8
114.084	30.6292	10351	1035	156	Baiersk Surface Technology (Wuhan) Co., Ltd., Changqing Street, Dongxihu District, Wuhan City, Hubei Province	8
114.084	30.6382	3048	502	17	Jinshan Avenue, Changqing Street, Dongxihu District, Wuhan City, Hubei Province	8
114.084	30.6472	86	38	1	Xinqiao Village, Changqing Street, Dongxihu District, Wuhan City, Hubei Province	6
114.084	30.6562	18	0	2	Lianghualan Road, Zoumaling Street, Dongxihu District, Wuhan City, Hubei Province	5
114.084	30.6741	18	8	3	Zhuxin Road, Zoumaling Street, Dongxihu District, Wuhan City, Hubei Province	6
114.084	30.6831	256	46	0	Take Xinlu, Baiquan Street, Dongxihu District, Wuhan City, Hubei Province	5
114.084	30.6921	73	11	1	Qizhigou Village, Baiquan Street, Dongxihu District, Wuhan City, Hubei Province	5
114.084	30.7011	176	31	5	Shuibai Road, Baiquan Street, Dongxihu District, Wuhan City, Hubei Province	7
114.084	30.7101	178	12	5	Research Institute of Smart Aquaculture, Zhonghuazhong Circular Aquaculture, Baiquan Street, Dongxihu District, Wuhan City, Hubei Province	7
114.084	30.7191	5083	138	15	S17 Qiaoxiao Expressway, Baiquan Street, Dongxihu District, Wuhan City, Hubei Province	8
114.084	30.728	60	21	0	West Lake Second Brigade, Baiquan Street, Dongxihu District, Wuhan City, Hubei Province	4
114.084	30.737	62	20	1	Hubei Yichi Tianxia Ecological Agriculture Technology Co., Ltd., Dongshan Street, Dongshan District, Wuhan City, Hubei Province	6
114.084	30.746	41	5	9	Huakun Ecological Park, Dongshan Street, Dongshan District, Wuhan City, Hubei Province	7
114.084	30.755	70	10	2	Dongshan Street, Dongshan District, Donghu District, Wuhan City, Hubei Province	6
114.084	30.764	13	6	0	Dongshan Street, Dongshan District, Donghu District, Wuhan City, Hubei Province	3
114.084	30.7819	16	0	0	Xiaojiakou, Dongshan Street, Dongshan District, Wuhan City, Hubei Province, Hubei Xiaogan Zhuhu National Wetland Park	1
114.094	30.2071	7	0	1	Hubei Zilong Paint Technology Co., Ltd., Jinkou Street, Jiangxia District, Wuhan City, Hubei Province	3
114.094	30.2161	14	7	1	Nan'an Sancun Village Committee, Jinkou Street, Jiangxia District, Wuhan City, Hubei Province	5
114.094	30.2251	31	7	0	Jiuquti Road, Jinkou Street, Jiangxia District, Wuhan City, Hubei Province	3
114.094	30.234	8	0	1	Luhu West Road, Jinkou Street, Jiangxia District, Wuhan City, Hubei Province	3
114.094	30.252	132	3	7	Provincial Road 102, Jinkou Street, Jiangxia District, Wuhan City, Hubei Province	7
114.094	30.261	89	1	0	Lighthead, Jingang New District, Jiangxia District, Wuhan City, Hubei Province	3
114.094	30.27	72	9	0	Customized Hesheng Yaju Wardrobe, Jinkou Street, Jiangxia District, Wuhan City, Hubei Province	4
114.094	30.2789	46	4	0	Shangou, Jingang New District, Jiangxia District, Wuhan City, Hubei Province	3
114.094	30.2879	35	7	0	Shamadi, Jingang New District, Jiangxia District, Wuhan City, Hubei Province	3
114.094	30.2969	23	1	0		2
114.094	30.3059	20	2	2	Chiji Dukou, Shamao Street, Hannan District, Wuhan City, Hubei Province	5
114.094	30.3149	20	6	3	Shamadi, South Guojiang City, Shamadi, Hannan District, Wuhan City, Hubei Province	6
114.094	30.3239	188	36	21	Area C of Huading Industrial Park, No. 220 Xingsheng Road, Shamao Street, Hannan District, Wuhan City, Hubei Province	7
114.094	30.3328	891	97	89	Area B of Huading Industrial Park, Xingsan Road, Shamao Street, Hannan District, Wuhan City, Hubei Province	8
114.094	30.3418	617	81	35	Guangze Precision Machinery, Hannan Avenue, Shamao Street, Hannan District, Wuhan City, Hubei Province	8
114.094	30.3508	688	288	42	Hongfang Restaurant, Dongjing Street, Hannan District, Wuhan City, Hubei Province (Hannan Avenue Store)	8
114.094	30.3598	1303	235	13	Qianyuewan Yingcuiwan, Qianyuewan, Dongjing Street, Hannan District, Wuhan City, Hubei Province	8
114.094	30.3688	299	31	0	S13, Junshan Street, Caidian District, Wuhan City, Hubei Province	5
114.094	30.3777	409	106	0	Guanlianhu Road, Junshan Street, Caidian District, Wuhan City, Hubei Province	5
114.094	30.3867	58	24	0	Guanlianhu Road, Junshan Street, Caidian District, Wuhan City, Hubei Province	4
114.094	30.3957	21	0	1	Huanglingji Avenue, Junshan Street, Caidian District, Wuhan City, Hubei Province	4
114.094	30.4047	35	19	10	New crown vaccination site of Junshan Health Center, Junshan Street, Caidian District, Wuhan City, Hubei Province	7
114.094	30.4137	508	52	3	G4 Beijing-Hong Kong-Macao Expressway, Junshan Street, Caidian District, Wuhan City, Hubei Province Hanyang No. 3 Middle School	7
114.094	30.4227	639	74	3	Yunfeng Avenue, Junshan Street, Caidian District, Wuhan City, Hubei Province	7
114.094	30.4316	412	37	4	Zhushan Lake (South) Station (tram station) in Junshan Street, Caidian District, Wuhan City, Hubei Province	7
114.094	30.4406	772	109	10	Quanli South Road, Quanli 1st Road, Chuanyang Street, Caidian District, Wuhan City, Hubei Province-Road Parking Space	7
114.094	30.4496	5300	745	43	ZF Automobile Safety System (Wuhan) Co., Ltd., Quanli Yilu, Chuanyang Street, Caidian District, Wuhan City, Hubei Province	8
114.094	30.4586	6281	945	281	Xuefeng Primary School, Wuhan Economic and Technological Development Zone, Xuefeng Community, Chuanyang Street, Caidian District, Wuhan City, Hubei Province	8
114.094	30.4676	31940	6094	182	Houguanhu Greenway, Chuanyang Street, Caidian District, Wuhan City, Hubei Province	8
114.094	30.4765	1294	137	1	Houguanhu Greenway, Chuanyang Street, Caidian District, Wuhan City, Hubei Province	7
114.094	30.4855	1350	323	11	Phase 2 of Shimao Longwan, Tianxi Ring Road, Daji Street, Caidian District, Wuhan City, Hubei Province	7
114.094	30.4945	1307	140	2	Tianxi Ring Road, Daji Street, Caidian District, Wuhan City, Hubei Province	7
114.094	30.5035	421	106	3	Shimao Guofeng Phase 10, Nanhucun Road, Daji Street, Caidian District, Wuhan City, Hubei Province	7
114.094	30.5125	15372	3123	48	Phase I of Greenland Meihu, Daji Street, Caidian District, Wuhan City, Hubei Province	8
114.094	30.5215	163	11	0	Taihe Zhiyin Lake Yard, Daji Street, Caidian District, Wuhan City, Hubei Province	4
114.094	30.5304	72	10	2	Caidian District, Wuhan City, Hubei Province, Houguanhu Ecological Livable New City Ma'an Road Sunchuang Mountain Shui Shop	6
114.094	30.5394	521	68	15	Zhiyin Lake Avenue, Ecologically Livable New Town, Caidian District, Wuhan City, Hubei Province	7
114.094	30.5484	553	47	9	Zhancheng Street, Houguanhu Ecological Livable New Town, Caidian District, Wuhan City, Hubei Province	7
114.094	30.5574	13823	3167	60	Xintian Avenue, Ecologically Livable New Town, Caidian District, Wuhan City, Hubei Province	8
114.094	30.5664	1551	339	9	Caidian District, Wuhan City, Hubei Province, Houguanhu Ecological Livable New City S15 Hancai Expressway	7
114.094	30.5753	168	25	0	Zhiyin Lake Avenue, Ecologically Livable New Town, Caidian District, Wuhan City, Hubei Province	5
114.094	30.5843	306	60	5	Zhiyin Lake Avenue, Ecologically Livable New Town, Caidian District, Wuhan City, Hubei Province	7
114.094	30.5933	2189	309	20	Sanguancun Road, Houguanhu Ecologically Livable New Town, Caidian District, Wuhan City, Hubei Province	8
114.094	30.6023	3174	443	102	Zhiyin Lake Avenue, Cihui Street, Dongxihu District, Wuhan City, Hubei Province	8
114.094	30.6113	31831	6080	97	Li Shizhen Group (Hubei) Pharmaceutical Development Co., Ltd., Xinsheng Road, Changqing Street, Dongxihu District, Wuhan City, Hubei Province	8
114.094	30.6203	15456	2272	288	Zhiyin Lake Avenue, Changqing Street, Dongxihu District, Wuhan City, Hubei Province	8
114.094	30.6292	8428	1248	185	Wuhan Tiancheng Tongshun Logistics Co., Ltd. (Tiansheng Logistics Co., Ltd.) 2056 Logistics Park, Jinghe Street, Dongxihu District, Wuhan City, Hubei Province	8
114.094	30.6382	4613	928	4	Jinshan Avenue Auxiliary Road, Jinghe Street, Dongxihu District, Wuhan City, Hubei Province	7
114.094	30.6472	9	1	0	Xinqiao Village, Jinghe Street, Dongxihu District, Wuhan City, Hubei Province	1
114.094	30.6652	9	0	0	West Lake Brigade, Jinghe Street, Dongxihu District, Wuhan City, Hubei Province	0
114.094	30.6741	6	0	0	Take Xinlu, Jinghe Street, Dongxihu District, Wuhan City, Hubei Province	0
114.094	30.6831	124	18	0	Take Xinlu, Baiquan Street, Dongxihu District, Wuhan City, Hubei Province	4
114.094	30.6921	50	11	0	G42 Shanghai-Chengdu Expressway, Baiquan Street, Dongxihu District, Wuhan City, Hubei Province	4
114.094	30.7011	219	38	9	Shuibai Road, Baiquan Street, Dongxihu District, Wuhan City, Hubei Province	7
114.094	30.7101	214	20	10	Party Members and Mass Service Center, West No. 1, Baiquan Street, Dongxihu District, Wuhan City, Hubei Province	7
114.094	30.7191	178	43	8	Small candy picking garden, Baiquan Street, Dongxihu District, Wuhan City, Hubei Province	7
114.094	30.728	31	8	0	Tian Fujun, Baiquan Street, Dongxihu District, Wuhan City, Hubei Province	3
114.094	30.737	7	0	0	Meishenhuju, Baiquan Street, Dongxihu District, Wuhan City, Hubei Province	0
114.094	30.746	20	3	6	Wuhan Kangshengyuan Ecological Agriculture Co., Ltd., Dongshan Street, Dongshan District, Wuhan City, Hubei Province	7
114.094	30.755	34	18	0	Dongshan Street, Dongshan District, Donghu District, Wuhan City, Hubei Province	4
114.094	30.764	47	22	0	Baiquan Street, Dongxihu District, Wuhan City, Hubei Province	4
114.105	30.2071	12	0	1	Taipingzha Village, Jinkou Street, Jiangxia District, Wuhan City, Hubei Province	4
114.105	30.2251	112	18	0	Jiuquti Road, Jinkou Street, Jiangxia District, Wuhan City, Hubei Province	4
114.105	30.234	63	4	0	047 Township Road, Jinkou Street, Jiangxia District, Wuhan City, Hubei Province	3
114.105	30.243	28	11	1	Three Streets, Jinkou Street, Jiangxia District, Wuhan City, Hubei Province	5
114.105	30.252	29	2	8	Tanta Lake, Jinshui Street, Jiangxia District, Wuhan City, Hubei Province	7
114.105	30.261	10	0	10	Tanta Lake, Jinkou Street, Jiangxia District, Wuhan City, Hubei Province	7
114.105	30.27	1	0	3	Provincial Road 102, Jinkou Street, Jiangxia District, Wuhan City, Hubei Province	5
114.105	30.2789	18	3	3	Abandoned embankment in Jingang New District, Jiangxia District, Wuhan City, Hubei Province	6
114.105	30.2879	81	9	0	Xindi, Jinkou Street, Jiangxia District, Wuhan City, Hubei Province	4
114.105	30.2969	29	0	5	Mentangwan, Jinkou Street, Jiangxia District, Wuhan City, Hubei Province	6
114.105	30.3059	223	50	1	Zhangjiadun, Jinkou Street, Jiangxia District, Wuhan City, Hubei Province	6
114.105	30.3149	3	1	0	Shamadi, Jingang New District, Jiangxia District, Wuhan City, Hubei Province	0
114.105	30.3328	5	2	0	Shamadi, Shama Street, Hannan District, Wuhan City, Hubei Province	1
114.105	30.3418	4	2	2	Shamaodi, Junshan Street, Caidian District, Wuhan City, Hubei Province	5
114.105	30.3508	30	12	1	Wuhan Bangda Metallurgical Technology Co., Ltd., Junshan Street, Caidian District, Wuhan City, Hubei Province	5
114.105	30.3598	1091	301	8	Wangjia Village Branch Committee of the Communist Party of China, Junshan Street, Caidian District, Wuhan City, Hubei Province	7
114.105	30.3688	368	59	6	S13, Junshan Street, Caidian District, Wuhan City, Hubei Province	7
114.105	30.3777	752	110	2	Guanlianhu Road, Junshan Street, Caidian District, Wuhan City, Hubei Province	7
114.105	30.3867	1112	369	2	Huanglingji Avenue, Junshan Street, Caidian District, Wuhan City, Hubei Province	7
114.105	30.3957	2663	709	0	G4 Beijing-Hong Kong-Macao Expressway, Junshan Street, Caidian District, Wuhan City, Hubei Province	6
114.105	30.4047	10	0	0	G4 Beijing-Hong Kong-Macao Expressway, Junshan Street, Caidian District, Wuhan City, Hubei Province	0
114.105	30.4137	198	27	0	Chegu Avenue, Junshan Street, Caidian District, Wuhan City, Hubei Province	5
114.105	30.4227	351	37	4	Longlingshan Ecological Park, 033 Township, Junshan Street, Caidian District, Wuhan City, Hubei Province	7
114.105	30.4316	118	29	3	031 Township Road, Junshan Street, Caidian District, Wuhan City, Hubei Province	7
114.105	30.4406	39	10	0	Zhushan Hubei Road, Chuanyang Street, Caidian District, Wuhan City, Hubei Province	4
114.105	30.4496	3277	319	16	Quanli Nan Community Branch Committee of the Communist Party of China, Chuanyang Street, Caidian District, Wuhan City, Hubei Province Quanli Nan Enterprise Community	8
114.105	30.4586	3793	488	16	Dingxin Power, No. 708, Dongfeng Avenue, Chuanyang Street, Caidian District, Wuhan City, Hubei Province	8
114.105	30.4676	19669	2193	40	Yongjiu Community, Fengshu North Road, Chuanyang Street, Caidian District, Wuhan City, Hubei Province	8
114.105	30.4765	3160	349	2	Luhu County, Zhanghuzui Country Garden, Chuanyang Street, Caidian District, Wuhan City, Hubei Province	7
114.105	30.4855	261	30	0	Zhuqi Shimao National Style Phase 12, Daji Street, Caidian District, Wuhan City, Hubei Province	5
114.105	30.4945	44	21	1	Tianxi Ring Road, Daji Street, Caidian District, Wuhan City, Hubei Province	5
114.105	30.5035	106	33	0	Sunjiazui, Daji Street, Caidian District, Wuhan City, Hubei Province	5
114.105	30.5125	8006	1542	141	People's letters in Daji Street, Caidian District, Wuhan City, Hubei Province·Millennium Beauty (North District) People's letters in Millennium Beauty North District	8
114.105	30.5215	5415	1038	0	Houguanhu Greenway, Yuxian Street, Caidian District, Wuhan City, Hubei Province	7
114.105	30.5304	14	0	0	Building 11, Sunac Shanshui Shijian, Caidian District, Wuhan City, Hubei Province	1
114.105	30.5394	4571	746	6	Houjiazui, Ecologically Livable New City, Caidian District, Wuhan City, Hubei Province	7
114.105	30.5484	20297	3261	81	Wuhan Dongsheng Textile Co., Ltd., No. 464, Xintian Avenue, Caidian District, Wuhan City, Wuhan City, Hubei Province	8
114.105	30.5574	1206	149	23	Caidian District, Wuhan City, Hubei Province, Houguanhu Ecological Livable New City Zero-2 Industrial Park	8
114.105	30.5664	183	42	1	Caidian District, Wuhan City, Hubei Province, Houguanhu Ecological Livable New City S15 Hancai Expressway	6
114.105	30.5753	39	7	3	Zhiyin Avenue, Ecological Livable New Town, Caidian District, Wuhan City, Hubei Province	6
114.105	30.5843	2465	298	7	Haishan Road, Ecologically Livable New Town, Caidian District, Wuhan City, Hubei Province	7
114.105	30.5933	2143	102	12	Caidian District, Wuhan City, Hubei Province, Xianghenan Road, Caidian District, Houguanhu Ecological Livable New Town, Xianghenan Road	7
114.105	30.6023	3000	566	224	Tianli Logistics Park, Tuanjie South Road, Cihui Street, Dongxihu District, Wuhan City, Hubei Province	8
114.105	30.6113	34405	8198	168	Wuhan Tuanjiebafang Labor Protection Market Wuhan Small and Medium Enterprise City, Cihui Street, Dongxihu District, Wuhan City, Hubei Province	8
114.105	30.6203	9164	1771	1457	22 Zhenghuawen Packaging Co., Ltd., Dongwu Avenue, Wujiashan Street, Dongxihu District, Wuhan City, Hubei Province (Xincheng 14th Road)	9
114.105	30.6292	38414	2339	137	Wuhan Xinzheng Building Materials Co., Ltd., No. 4, Dongwu Avenue, Jinghe Street, Dongxihu District, Wuhan City, Hubei Province	8
114.105	30.6382	3334	451	9	Jiangyuelan Garden, Jinghe Street, Dongxihu District, Wuhan City, Hubei Province	8
114.105	30.6472	70	5	1	Xincheng 13th Road, Jinghe Street, Dongxihu District, Wuhan City, Hubei Province	5
114.105	30.6562	408	49	0	Fourth Ring Road, Jinghe Street, Dongxihu District, Wuhan City, Hubei Province	5
114.105	30.6652	275	20	0	Shanggang, Jinghe Street, Dongxihu District, Wuhan City, Hubei Province	5
114.105	30.6741	121	28	0	Shuangqihu, Jinghe Street, Dongxihu District, Wuhan City, Hubei Province	5
114.105	30.6831	341	70	4	Take Xinlu, Baiquan Street, Dongxihu District, Wuhan City, Hubei Province	7
114.105	30.6921	65	10	3	Jiutong Road, Baiquan Street, Dongxihu District, Wuhan City, Hubei Province	6
114.105	30.7011	241	29	3	Shuigangban, Baiquan Street, Dongxihu District, Wuhan City, Hubei Province	7
114.105	30.7101	37	5	0	Small wall, Baiquan Street, Dongxihu District, Wuhan City, Hubei Province	3
114.105	30.7191	77	4	2	Dongbai Road, Baiquan Street, Dongbai Lake District, Wuhan City, Hubei Province	6
114.105	30.728	116	19	2	Dahuang Box, Baiquan Street, Dongxihu District, Wuhan City, Hubei Province	6
114.105	30.737	83	8	1	Xiaojiazui, Baiquan Street, Dongxihu District, Wuhan City, Hubei Province	5
114.105	30.746	472	49	3	Baiquan Street, Dongxihu District, Wuhan City, Hubei Province	7
114.105	30.755	11	0	0	Dongshan Street, Dongshan District, Donghu District, Wuhan City, Hubei Province	0
114.105	30.764	1	0	0	Baiquan Street, Dongxihu District, Wuhan City, Hubei Province	0
114.105	30.7729	1	0	0	Baiquan Street, Dongxihu District, Wuhan City, Hubei Province	0
114.115	30.1981	1	0	0	Linongzha Village, Fasi Street, Jiangxia District, Wuhan City, Hubei Province	0
114.115	30.2071	81	12	0	Baofengzha Village, Fasi Street, Jiangxia District, Wuhan City, Hubei Province	4
114.115	30.2161	7	0	0	Taipingzha Village, Jinkou Street, Jiangxia District, Wuhan City, Hubei Province	0
114.115	30.2251	77	4	1	Jiuquti Road, Jinkou Street, Jiangxia District, Wuhan City, Hubei Province	5
114.115	30.234	12	2	2	047 Township Road, Jinkou Street, Jiangxia District, Wuhan City, Hubei Province	5
114.115	30.243	10	2	0	Changpanzi, Jinkou Street, Jiangxia District, Wuhan City, Hubei Province	2
114.115	30.252	25	4	0	Four streets, Jinkou Street, Jiangxia District, Wuhan City, Hubei Province	3
114.115	30.2789	66	9	0	Kangjiapan, Jinkou Street, Jiangxia District, Wuhan City, Hubei Province	4
114.115	30.2879	49	6	3	Provincial Road 102, Jinkou Street, Jiangxia District, Wuhan City, Hubei Province	6
114.115	30.2969	1227	95	29	Fanhu Road, Jinkou Street, Jiangxia District, Wuhan City, Hubei Province	8
114.115	30.3059	605	12	2	Fanhu, Jinkou Street, Jiangxia District, Wuhan City, Hubei Province	6
114.115	30.3149	7	2	0	Chiji Middle School, Jinkou Street, Jiangxia District, Wuhan City, Hubei Province	1
114.115	30.3239	2	0	0	Shamadi, Jingang New District, Jiangxia District, Wuhan City, Hubei Province	0
114.115	30.3508	15	12	7	Wuhan Xinmingang Wood Industry Co., Ltd., Junshan Street, Caidian District, Wuhan City, Hubei Province	7
114.115	30.3598	425	39	6	Qiming Logistics Junshan Library, Junshan Street, Caidian District, Wuhan City, Hubei Province	7
114.115	30.3688	535	17	9	Longhu West Road, Junshan Street, Caidian District, Wuhan City, Hubei Province	7
114.115	30.3777	5943	415	3	Wuhan Institute of Artificial Intelligence and New Energy Vehicle Industry Technology, S13, Junshan Street, Caidian District, Wuhan City, Hubei Province (under construction)	7
114.115	30.3867	215	51	9	Tongshun Avenue, Junshan Street, Caidian District, Wuhan City, Hubei Province	7
114.115	30.3957	976	135	18	Wuhan Tianwaitian Resort, Junshan Street, Caidian District, Wuhan City, Hubei Province	8
114.115	30.4047	273	31	0	Hubei Dongmu Modern Financial Bay 159R2 plot and 124C2 plot (Phase I) (under construction)	5
114.115	30.4137	95	4	0	Junshan Street, Caidian District, Wuhan City, Hubei Province	3
114.115	30.4227	204	14	5	Longlingshan BBQ Garden, Junshan Street, Caidian District, Wuhan City, Hubei Province	7
114.115	30.4316	225	49	3	Kaisenying·Wuhan Sunset Camping Site, Junshan Street, Caidian District, Wuhan City, Hubei Province	7
114.115	30.4406	8	0	1	Dongfeng Honda Factory No. 3, Chuanyang Street, Caidian District, Wuhan City, Hubei Province Dongfeng Honda Automobile Co., Ltd. (third factory)	3
114.115	30.4496	8034	847	52	Shenlong Company (Wuhan Factory 3)	8
114.115	30.4586	3837	299	25	Wuhan Factory (East 1 Gate) Shenlong Company (Wuhan Factory 3)	8
114.115	30.4676	12292	2459	114	Sifang Transportation and Logistics East District, Chuanyang Street, Caidian District, Wuhan City, Hubei Province	8
114.115	30.4765	6847	1002	1	Building 1, Haitian Yisewang Haijiao, Chuankou Street, Caidian District, Wuhan City, Hubei Province	7
114.115	30.4855	201	32	0	Building 61, Haitian Yise Guanchaoyuan, Dunkou Street, Caidian District, Wuhan City, Hubei Province	5
114.115	30.4945	14	3	0	Houguanhu, Daji Street, Caidian District, Wuhan City, Hubei Province	2
114.115	30.5035	5	0	1	Liujiazui, Daji Street, Caidian District, Wuhan City, Hubei Province	3
114.115	30.5125	2714	342	96	No. 4-11, Swan Lake Avenue, Daji Street, Caidian District, Wuhan City, Hubei Province Renxin Millennium Beauty	8
114.115	30.5215	6551	947	26	Houguanhu Greenway, Yuxian Street, Caidian District, Wuhan City, Hubei Province	8
114.115	30.5304	175	34	2	Expert Community of Tongji Hospital, Tongji Hospital, Caidian District, Wuhan City, Hubei Province	6
114.115	30.5394	1718	316	74	Caidian District, Wuhan City, Hubei Province, Houguanhu Ecological Livable New Town Health Valley Road, Caidian District, Wuhan City	8
114.115	30.5484	8331	1590	211	Wuhan Caidian District, Wuhan City, Hubei Province, Houguanhu Ecological Livable New City, Wuhan Fule Jiahe Industry and Trade Co., Ltd.	8
114.115	30.5574	8205	1218	24	Building 11, Yangwan, Yangwan, Caidian District, Wuhan City, Hubei Province	8
114.115	30.5664	897	103	0	Caidian District, Wuhan City, Hubei Province, Houguanhu Ecological Livable New City S15 Hancai Expressway	6
114.115	30.5753	289	27	3	S40 Fourth Ring Road, Houguanhu Ecological Livable New City, Caidian District, Wuhan City, Hubei Province	7
114.115	30.5843	2325	341	25	Caidian District, Wuhan City, Hubei Province, Xianghenan Road, Caidian District, Houguanhu Ecological Livable New Town, Xianghenan Road	8
114.115	30.5933	400	45	13	Fourth Ring Road S40, Cihui Street, Dongxihu District, Wuhan City, Hubei Province	7
114.115	30.6023	13137	1252	156	Wuhan Small and Medium Enterprise City, Cihui Street, Dongxihu District, Wuhan City, Hubei Province Wuhan Shengtai Plastic Mold Co., Ltd.	8
114.115	30.6113	47877	5177	266	Renovation Avenue, Changqing Street, Dongxihu District, Wuhan City, Hubei Province	8
114.115	30.6203	19296	4038	184	Hardware South Street Zhongnan Great Wall Market, Wujiashan Street, Dongxihu District, Wuhan City, Hubei Province	8
114.115	30.6292	32382	4128	187	Jinshan Avenue, Jinghe Street, Dongxihu District, Wuhan City, Hubei Province	8
114.115	30.6382	12148	2046	42	Building 6, Hengda Dijing, Jinghe Street, Dongxihu District, Wuhan City, Hubei Province	8
114.115	30.6472	50342	935	30	Jinbei 1st Road, Jinghe Street, Dongxihu District, Wuhan City, Hubei Province	8
114.115	30.6562	10775	425	8	Fourth Ring Road, Jinghe Street, Dongxihu District, Wuhan City, Hubei Province	8
114.115	30.6652	3145	671	7	Binhe South Road, Jinghe Street, Dongxihu District, Wuhan City, Hubei Province	7
114.115	30.6741	651	89	4	Xihubei Road, Jinghe Street, Dongxihu District, Wuhan City, Hubei Province	7
114.115	30.6831	1396	100	2	Fourth Ring Road, Jinghe Street, Dongxihu District, Wuhan City, Hubei Province	7
114.115	30.6921	116	13	0	China Telecom Central Big Data Center (network security base) in Jinghe Street, Dongxihu District, Wuhan City, Hubei Province	4
114.115	30.7011	234	44	1	G42 Shanghai-Chengdu Expressway, Baiquan Street, Dongxihu District, Wuhan City, Hubei Province	6
114.115	30.7101	19	5	0	Shuibai Road, Baiquan Street, Dongxihu District, Wuhan City, Hubei Province	3
114.115	30.7191	1670	107	8	Huaxulang Industrial Park, Baiquan Street, Dongxihu District, Wuhan City, Hubei Province	7
114.115	30.728	10218	892	12	Wuhan Zhongwei Deyuan Hydraulic Machinery Co., Ltd., Baiquan Street, Dongxihu District, Wuhan City, Hubei Province	8
114.115	30.737	883	124	4	Dadian in Baiquan Street, Dongxihu District, Wuhan City, Hubei Province	7
114.115	30.746	367	51	7	Shuihushan Side Road, Baiquan Street, Dongxihu District, Wuhan City, Hubei Province	7
114.115	30.755	19	2	0	Baiquan Street, Dongxihu District, Wuhan City, Hubei Province	2
114.115	30.764	3	1	0	Baiquan Street, Dongxihu District, Wuhan City, Hubei Province	0
114.126	30.1891	28	3	0	Fengshouzha Village, Fasi Street, Jiangxia District, Wuhan City, Hubei Province	3
114.126	30.1981	6	4	2	Linongzha Village, Fasi Street, Jiangxia District, Wuhan City, Hubei Province	5
114.126	30.2071	2	2	2	Party Members and Mass Service Center of Dengjia Wawu Brigade, Jinshui Street, Jiangxia District, Wuhan City, Hubei Province	5
114.126	30.2161	10	0	1	Luhu New Team 2, Jinkou Street, Jiangxia District, Wuhan City, Hubei Province	4
114.126	30.2251	6	0	2	Dafubu (bus stop)	5
114.126	30.234	6	0	0	047 Township Road, Jinkou Street, Jiangxia District, Wuhan City, Hubei Province	0
114.126	30.243	89	8	0	047 Township Road, Jinkou Street, Jiangxia District, Wuhan City, Hubei Province	4
114.126	30.252	3	0	0	047 Township Road, Jinkou Street, Jiangxia District, Wuhan City, Hubei Province	0
114.126	30.27	30	0	0	Nanning Village, Jinkou Street, Jiangxia District, Wuhan City, Hubei Province	1
114.126	30.2789	74	1	0	047 Township Road, Jinkou Street, Jiangxia District, Wuhan City, Hubei Province	3
114.126	30.2879	510	36	5	Jinkang South Road, Jinshui Street, Jiangxia District, Wuhan City, Hubei Province	7
114.126	30.2969	1654	163	121	No. 17, Zhaxi Road, Jinkou Street, Jiangxia District, Wuhan City, Hubei Province	8
114.126	30.3059	23182	321	1	Changjiang, Jinkou Street, Jiangxia District, Wuhan City, Hubei Province	7
114.126	30.3149	138	12	1	Wuhan Xinmaoyuan Garden Landscape Co., Ltd., Jinkou Street, Jiangxia District, Wuhan City, Hubei Province	6
114.126	30.3239	254	55	0	Wuhan City, Jinkou Street, Jiangxia District, Wuhan City, Hubei Province ·Wuhan Baomiao Garden Landscape Greening Engineering Co., Ltd.	5
114.126	30.3328	3042	242	3	No. 10, Jinling Road, Jingang New District, Jiangxia District, Wuhan City, Hubei Province	7
114.126	30.3418	1944	104	3	No. 201, Jinhuai Road, Jingang New District, Jiangxia District, Wuhan City, Hubei Province	7
114.126	30.3508	8486	1294	0	Zhongshan Jiantan, Jingang New District, Jiangxia District, Wuhan City, Hubei Province	7
114.126	30.3598	96	11	2	Dajunshan, Junshan Street, Caidian District, Wuhan City, Hubei Province	6
114.126	30.3688	3326	189	56	Longhu West Road, Junshan Street, Caidian District, Wuhan City, Hubei Province	8
114.126	30.3777	996	100	25	Wuhan Yulong Holiday Hotel, Junshan Street, Caidian District, Wuhan City, Hubei Province (Dajunshan Metro Station Store) District A, Phase II of Longhu Community	8
114.126	30.3867	546	60	1	G4 Beijing-Hong Kong-Macao Expressway, Junshan Street, Caidian District, Wuhan City, Hubei Province	6
114.126	30.3957	43	5	1	Hyundai 1st Road, Junshan Street, Caidian District, Wuhan City, Hubei Province	5
114.126	30.4047	459	63	6	Tongshun Avenue, Junshan Street, Caidian District, Wuhan City, Hubei Province	7
114.126	30.4137	1861	168	1	Tongshun Avenue, Junshan Street, Caidian District, Wuhan City, Hubei Province	7
114.126	30.4227	198	17	3	Wuhan Longlingshan Forest RV Camp Longlingshan Ecological Park, Junshan Street, Caidian District, Wuhan City, Hubei Province	7
114.126	30.4316	373	39	5	Longling Mountain Greenway Longling Mountain Ecological Park, Junshan Street, Caidian District, Wuhan City, Hubei Province	7
114.126	30.4406	4091	936	1	Pengwan, Chuanyang Street, Caidian District, Wuhan City, Hubei Province	7
114.126	30.4496	897	200	40	Furgesen, Chuanyang Street, Caidian District, Wuhan City, Hubei Province	8
114.126	30.4586	3134	315	78	District 2 of Aofa Catering, Wuhan Economic and Technological Development Zone Private Science and Technology Industrial Park, Chuanyang Street, Caidian District, Wuhan City, Hubei Province	8
114.126	30.4676	31175	4577	183	Lanzhou Beef Ramen, Chuankou Street, Caidian District, Wuhan City, Hubei Province (Yintai Technology Industrial Park Store) Yintai Technology Industrial Park	8
114.126	30.4765	55993	4264	228	Tingtao Guanhailongtai, Chuankou Street, Caidian District, Wuhan City, Hubei Province	8
114.126	30.4855	6726	1090	0	Tingtao Guanhai Longtai Building, Building A3, Longtai, Chuankou Street, Caidian District, Wuhan City, Hubei Province	7
114.126	30.4945	55	7	0	Fourth Ring Road, S40, Chuanyang Street, Caidian District, Wuhan City, Hubei Province	3
114.126	30.5035	54	21	0	S40 Fourth Ring Road, Daji Street, Caidian District, Wuhan City, Hubei Province	4
114.126	30.5125	146	21	7	West Coast, Daji Street, Caidian District, Wuhan City, Hubei Province	7
114.126	30.5215	6229	1196	38	Oriental Hawaii International Garden Oriental Hawaii International Garden Bihai Cloud Beach, Daji Street, Caidian District, Wuhan City, Hubei Province	8
114.126	30.5304	50	2	0	Caidian District, Wuhan City, Hubei Province Kaiyuan Senbo Ecological Resort Park	3
114.126	30.5394	163	32	2	Houguanhu Greenway, Caidian District, Wuhan City, Hubei Province	6
114.126	30.5484	3726	622	252	Hubei Province, Caidian District, Caidian District, Wuhan City, Hubei Province, Ecological City Avenue	8
114.126	30.5574	10533	1947	79	Caidian District, Wuhan City, Hubei Province, Houguanhu Ecological Livable New City Xintian Community	8
114.126	30.5664	1816	255	1	Caidian District, Wuhan City, Hubei Province, Houguanhu Ecological Livable New City S15 Hancai Expressway	7
114.126	30.5753	151	19	2	Caidian District, Wuhan City, Hubei Province, Hong Kong Lake Ecological Livable New Town, Hanjin Avenue, Hanjin Avenue, Wuhan City, Hubei Province	6
114.126	30.5843	346	29	15	Linjiatai, Yongfeng Street, Hanyang District, Wuhan City, Hubei Province	7
114.126	30.5933	2398	466	131	Caidian District, Wuhan City, Hubei Province, Xianghenan Road, Caidian District, Houguanhu Ecological Livable New Town, Xianghenan Road	8
114.126	30.6023	14360	1141	266	Wuhan Wahaha Hengfeng Beverage Co., Ltd., No. 800 Hui'an Avenue, Cihui Street, Dongxihu District, Wuhan City, Hubei Province	8
114.126	30.6113	19665	3179	478	Poly Qingneng Shiguangnian, Bafang Road, Changqing Street, Dongxihu District, Wuhan City, Hubei Province (under construction)	8
114.126	30.6203	55121	10686	400	Cube City Hotel, Changqing Street, Dongwu Avenue Light Rail Station Branch, Wuhan City, Hubei Province	8
114.126	30.6292	16110	2680	222	Shanshuixingchen, Wujiashan Street, Dongxihu District, Wuhan City, Hubei Province	8
114.126	30.6382	19826	2860	120	Pier 1139, Jinshan Avenue, Jinghe Street, Dongxihu District, Wuhan City, Hubei Province	8
114.126	30.6472	16008	2920	145	Dongxihu Lianhua Lake Junior High School, Jinger Road, Jinghe Street, Dongxihu District, Wuhan City, Hubei Province (under renovation)	8
114.126	30.6562	3612	809	19	Light Rail Cultural Park, Jinghe Street, Dongxihu District, Wuhan City, Hubei Province (under construction)	8
114.126	30.6652	2133	507	10	Chuanggu Road River Park, Jinghe Street, Dongxihu District, Wuhan City, Hubei Province	8
114.126	30.6741	1732	241	9	National Cybersecurity Talent and Innovation Base, Luocai Road, Jinghe Street, Dongxihu District, Wuhan City, Hubei Province	7
114.126	30.6831	2584	206	2	Project Management Center of Donghu District, Jinghe Street, Donghu District, Wuhan City, Hubei Province, China Communications Communications Second Navigation Engineering Bureau Co., Ltd., East and West Lake Area, Changjiang International Company	7
114.126	30.6921	247	67	0	Fourth Ring Road, Jinghe Street, Dongxihu District, Wuhan City, Hubei Province	5
114.126	30.7011	3015	194	2	Wuhan BOE Optoelectronics Technology Co., Ltd. (Gate 3) in Baiquan Street, Dongxihu District, Wuhan City, Hubei Province	7
114.126	30.7101	10402	2674	4	Zhenyang Agricultural Machinery Agricultural Cooperative, Baiquan Street, Dongxihu District, Wuhan City, Hubei Province	7
114.126	30.7191	2906	669	38	Baiquan Street Breeding Village, Dongxihu District, Wuhan City, Hubei Province	8
114.126	30.728	2440	335	161	Anyi Garden, Baiquan Street, Dongxihu District, Wuhan City, Hubei Province	8
114.126	30.737	768	117	25	No. 413, Baiquan Road, Baiquan Street, Dongxihu District, Wuhan City, Hubei Province	8
114.126	30.746	1305	54	12	Fishing Park, Baiquan Road, Baiquan Street, Dongxihu District, Wuhan City, Hubei Province	7
114.126	30.755	3773	487	1	Wuhan Seedling Science and Technology Innovation Demonstration Park (Baiquan Base) in Baiquan Street, Dongxihu District, Wuhan City, Hubei Province	7
114.126	30.764	3	0	0	Xinglongji, Baiquan Street, Dongxihu District, Wuhan City, Hubei Province	0
114.126	30.7729	46	4	0	Veterans Service Station of Beihu Brigade, Beihu Brigade, Donghu District, Donghu District, Donghu District, Wuhan City, Hubei Province	3
114.136	30.1622	14	7	0	Qijiapan, Fasi Street, Jiangxia District, Wuhan City, Hubei Province	3
114.136	30.1712	19	5	0	Gaobutou, Fasi Street, Jiangxia District, Wuhan City, Hubei Province	3
114.136	30.1801	31	12	0	Xingouzha Village, Fasi Street, Jiangxia District, Wuhan City, Hubei Province	4
114.136	30.1891	52	17	2	Weidong Village, Fasi Street, Jiangxia District, Wuhan City, Hubei Province	6
114.136	30.1981	4	2	0	Jinshui Breeding Base, Wuhan Huihua Sannong Seed Co., Ltd. R&D Center, Jinshui Street, Jiangxia District, Wuhan City, Hubei Province	1
114.136	30.2071	4	0	0	Luhu West Road, Jinshui Street, Jiangxia District, Wuhan City, Hubei Province	0
114.136	30.2161	4	0	0	Luhu West Road, Jinshui Street, Jiangxia District, Wuhan City, Hubei Province	0
114.136	30.2251	9	2	0	Luhu West 2nd Road, Jinshui Street, Jiangxia District, Wuhan City, Hubei Province	2
114.136	30.234	144	39	0	Xiwan Village, Jinkou Street, Jiangxia District, Wuhan City, Hubei Province	5
114.136	30.243	8	2	1	Three Jinkou Street, Jiangxia District, Wuhan City, Hubei Province	4
114.136	30.252	8	0	0	047 Township Road, Jinkou Street, Jiangxia District, Wuhan City, Hubei Province	0
114.136	30.261	87	1	0	047 Township Road, Jinkou Street, Jiangxia District, Wuhan City, Hubei Province	3
114.136	30.27	8	4	3	047 Township Road, Jinkou Street, Jiangxia District, Wuhan City, Hubei Province	6
114.136	30.2789	99	1	4	Fanhu Primary School, Jinkou Street, 047 Township, Jinkou Street, Jiangxia District, Wuhan City, Hubei Province	6
114.136	30.2879	122	26	1	Hongjiawan Road, Jinkou Street, Jiangxia District, Wuhan City, Hubei Province	6
114.136	30.2969	1056	142	223	No. 89, Jinshuizha Road, Jinkou Street, Jiangxia District, Wuhan City, Hubei Province	8
114.136	30.3059	69	11	4	Qingbu Bay, Jinkou Street, Jiangxia District, Wuhan City, Hubei Province	7
114.136	30.3149	181	17	3	Xia Shiziwu, Jinkou Street, Jiangxia District, Wuhan City, Hubei Province	7
114.136	30.3239	1648	333	7	Jinkou Kindergarten, No. 90 Jinhu Road, Jinkou Street, Jiangxia District, Wuhan City, Hubei Province	7
114.136	30.3328	5710	623	256	Zhangwangwan South Road, Jinkou Street, Jiangxia District, Wuhan City, Hubei Province	8
114.136	30.3418	1880	94	25	Zhongshan Ship Tourism Zone, Huaishan Village, Jinkou Street, Jiangxia District, Wuhan City, Hubei Province	8
114.136	30.3508	172	32	7	Zhongshan Ship Tourism Zone, Zhijin Road, Jinkou Street, Jiangxia District, Wuhan City, Hubei Province	7
114.136	30.3598	193	19	4	Zhijin Road, Jingang New District, Jiangxia District, Wuhan City, Hubei Province	7
114.136	30.3688	167	26	15	Junshan Motor Ferry, Junshan Street, Caidian District, Wuhan City, Hubei Province	7
114.136	30.3777	179	37	9	Jingkai Avenue, Junshan Street, Caidian District, Wuhan City, Hubei Province	7
114.136	30.3867	956	193	6	Tianxi Shangyuan·Lanyuan, Junshan Street, Caidian District, Wuhan City, Hubei Province (under construction)	7
114.136	30.3957	2661	197	0	Chuanjiangchi 3rd Road, Junshan Street, Caidian District, Wuhan City, Hubei Province	6
114.136	30.4047	373	24	5	Chuanjiangchi 1st Road, Junshan Street, Caidian District, Wuhan City, Hubei Province	7
114.136	30.4137	10655	2200	7	Tongshun Avenue, Junshan Street, Caidian District, Wuhan City, Hubei Province	7
114.136	30.4227	157	23	1	Wuhan Intelligent Connected Vehicle Test Site, Junshan Street, Caidian District, Wuhan City, Hubei Province (under construction)	6
114.136	30.4316	680	104	8	Wuhan Intelligent Connected Vehicle Test Site (under construction)	7
114.136	30.4406	1135	208	9	Phase I of the Intelligent Connected Vehicle Innovation Industrial Park, Junshan Street, Caidian District, Wuhan City, Hubei Province	7
114.136	30.4496	559	74	6	Lianrun Branch of Hubei Lianjian New Materials Co., Ltd., Chuanyang Street, Caidian District, Wuhan City, Hubei Province	7
114.136	30.4586	1776	167	22	Zhushanhu Avenue, Chuankou Street, Caidian District, Wuhan City, Hubei Province	8
114.136	30.4676	11738	1387	705	Haitian Sports Center, Chuankou Street, Caidian District, Wuhan City, Hubei Province Haitian Auto Parts World	8
114.136	30.4765	18082	3222	328	Hongshanfu County, Chuanyang Street, Caidian District, Wuhan City, Hubei Province	8
114.136	30.4855	21638	3238	20	Donghe Guanhu County, Chuanyang Street, Caidian District, Wuhan City, Hubei Province	8
114.136	30.4945	22190	1407	11	Zhong'an Shuangyu Daguan is located in Chuanyang Street, Caidian District, Wuhan City, Hubei Province	8
114.136	30.5035	3456	823	2		7
114.136	30.5125	2965	274	7	Fourth Ring Road, S40, Chuanyang Street, Caidian District, Wuhan City, Hubei Province	7
114.136	30.5215	16325	3526	34	Oriental Hawaii International Garden Oriental Hawaii International Garden Bihai Cloud Beach, Daji Street, Caidian District, Wuhan City, Hubei Province	8
114.136	30.5304	1264	165	3	Building 135, Dalidu, Yongfeng Street, Hanyang District, Wuhan City, Hubei Province	7
114.136	30.5394	346	27	8	Fourth Ring Road, S40, Yongfeng Street, Hanyang District, Wuhan City, Hubei Province	7
114.136	30.5484	6576	1317	63	China-French Ecological City Service Area, Yongfeng Street, Hanyang District, Wuhan City, Hubei Province	8
114.136	30.5574	10830	1804	198	Kuaihuolingheng Road, Yongfeng Street, Hanyang District, Wuhan City, Hubei Province	8
114.136	30.5664	8388	1484	0	Hubei Province, Caidian District, Caidian District, Houguanhu Ecological Livable New City Jindi International City Marketing Center Ground Parking Lot	7
114.136	30.5753	2078	423	4	Cuidi Jinjiang, Xianghenan Road, Yongfeng Street, Hanyang District, Wuhan City, Hubei Province	7
114.136	30.5843	786	94	3	Xianghenan Road, Yongfeng Street, Hanyang District, Wuhan City, Hubei Province	7
114.136	30.5933	1649	309	117	Phase 2 of Hanjiang Kangju, Cihui Street, Dongxihu District, Wuhan City, Hubei Province (2 gates in North) Phase 2 of Hanjiang Kangju Community	8
114.136	30.6023	16240	2584	163	Yihai (Northwest Gate) Yihai (Wuhan) Grain and Oil Industry Co., Ltd., Cihui Street, Dongxihu District, Wuhan City, Hubei Province	8
114.136	30.6113	32167	4615	334	No. 380 Tuanjie Street, Changqing Street, Dongxihu District, Wuhan City, Hubei Province	8
114.136	30.6203	38271	6950	1440	Dongxi Lake Center Plaza, Tianyuan West Village, Wujiashan Street, Dongxihu District, Wuhan City, Hubei Province	9
114.136	30.6292	59695	11232	604	Wujiashan No. 13, Shanbei Road, Wujiashan Street, Dongxihu District, Wuhan City, Hubei Province	9
114.136	30.6382	41403	4973	53	Fifth Ring Fashion Plaza, Lingang Avenue, Jinghe Street, Dongxihu District, Wuhan City, Hubei Province	8
114.136	30.6472	36719	6148	85	Zhida Road, Jinghe Street, Dongxihu District, Wuhan City, Hubei Province	8
114.136	30.6562	33025	5511	52	Jingxier Road, Jinghe Street, Dongxihu District, Wuhan City, Hubei Province	8
114.136	30.6652	29308	2104	10	Project Manager Department of Wuhan Lianfa P043 plot project, Jingxi 3rd Road, Jinghe Street, Dongxihu District, Wuhan City, Hubei Province	8
114.136	30.6741	18590	1627	26	Lingang Avenue, Jinghe Street, Dongxihu District, Wuhan City, Hubei Province	8
114.136	30.6831	1708	196	10	National Cybersecurity Talent and Innovation Base, Anye Road, Jinghe Street, Dongxihu District, Wuhan City, Hubei Province	7
114.136	30.6921	764	91	7	Fourth Ring Road, Baiquan Street, Dongxihu District, Wuhan City, Hubei Province	7
114.136	30.7011	2308	236	17	Dugonghu 4th Road, Baiquan Street, Dongxihu District, Wuhan City, Hubei Province	8
114.136	30.7101	349	63	4	Lingang Avenue, Baiquan Street, Dongxihu District, Wuhan City, Hubei Province	7
114.136	30.7191	517	66	6	Hongfu Xinyuan, Baiquan Street, Dongxihu District, Wuhan City, Hubei Province	7
114.136	30.728	223	45	13	Donghu Road, Baiquan Street, Donghu District, Wuhan City, Hubei Province	7
114.136	30.737	35	8	0	Yuejiakou, Baiquan Street, Dongxihu District, Wuhan City, Hubei Province	3
114.136	30.746	28	14	14	Jingde Temple (East Gate) in Baiquan Street, Donghu District, Wuhan City, Hubei Province	7
114.136	30.755	39	7	11	The solemn and wonderful place in Baiquan Street, Dongxihu District, Wuhan City, Hubei Province	7
114.136	30.764	2	0	0	Fuhe, Baiquan Street, Dongxihu District, Wuhan City, Hubei Province	0
114.147	30.1532	4456	112	0	Sizhang Village, Fasi Street, Jiangxia District, Wuhan City, Hubei Province	6
114.147	30.1622	155	7	4	Batang Village, Fasi Street, Jiangxia District, Wuhan City, Hubei Province (Bus Station)	7
114.147	30.1712	25	4	0	G0422 Wuhan-Shenzhen Expressway, Fasi Street, Jiangxia District, Wuhan City, Hubei Province	3
114.147	30.1801	28	8	3	Group 3 and 4, Fasi Street, Jiangxia District, Wuhan City, Hubei Province	6
114.147	30.1891	8	1	1	Lijiadun, Fasi Street, Jiangxia District, Wuhan City, Hubei Province	4
114.147	30.1981	26	1	0	G0422 Wuhan-Shenzhen Expressway, Jinshui Street, Jiangxia District, Wuhan City, Hubei Province	2
114.147	30.2071	78	5	0	G0422 Wuhan-Shenzhen Expressway, Jinshui Street, Jiangxia District, Wuhan City, Hubei Province	3
114.147	30.2161	33	8	0	Hujing West 6th Road, Jinshui Street, Jiangxia District, Wuhan City, Hubei Province	3
114.147	30.2251	38	3	5	Luhu West Road, Jinshui Street, Jiangxia District, Wuhan City, Hubei Province	6
114.147	30.234	219	11	2	Luhu West 3rd Road, Jinkou Street, Jiangxia District, Wuhan City, Hubei Province	6
114.147	30.243	61	13	0	Jinshui River, Jinkou Street, Jiangxia District, Wuhan City, Hubei Province	4
114.147	30.252	12	3	0	046 Township Road, Jinkou Street, Jiangxia District, Wuhan City, Hubei Province	2
114.147	30.261	179	23	2	047 Township Road, Jinkou Street, Jiangxia District, Wuhan City, Hubei Province	6
114.147	30.27	8	0	1	Huiyun Family Farm, Jiangxia District, Jiangxia District, Wuhan City, Hubei Province	3
114.147	30.2789	2	0	1	Xiaoxujiawan, Jinkou Street, Jiangxia District, Wuhan City, Hubei Province Wuhan Jinshui Luyuan Agricultural Development Co., Ltd.	3
114.147	30.2879	55	6	3	045 Township Road, Jinkou Street, Jiangxia District, Wuhan City, Hubei Province	6
114.147	30.2969	50	10	6	Fruit Tree Tea Research Institute of Hubei Academy of Agricultural Sciences (Jinshui Base)	7
114.147	30.3149	2	2	0	Lijiakou Street, Jiangxia District, Wuhan City, Hubei Province	1
114.147	30.3239	223	27	24	Wuhan Urban Construction-Rongcom Jinlin No. 1, Jinkou Street, Jiangxia District, Wuhan City, Hubei Province	7
114.147	30.3328	403	47	67	Mianhuawan Road, Jinkou Street, Jiangxia District, Wuhan City, Hubei Province	8
114.147	30.3418	10905	1056	70	New crown vaccination point of Jingang New District Community Health Service Center, Jinkou Street, Jiangxia District, Wuhan City, Hubei Province, Zhongshan Ship Tourism Zone	8
114.147	30.3508	174	20	10	Weijia Dashan Zhongshan Ship Tourism Zone, Jingang New District, Jiangxia District, Wuhan City, Hubei Province	7
114.147	30.3598	3740	56	3	Zhongshan Ship Tourism Zone, South Ring Road, Jingang New District, Jiangxia District, Wuhan City, Hubei Province	7
114.147	30.3688	302	22	0	G4 Beijing-Hong Kong-Macao Expressway, Junshan Street, Caidian District, Wuhan City, Hubei Province	5
114.147	30.3777	29	1	1	G4 Beijing-Hong Kong-Macao Expressway, Junshan Street, Caidian District, Wuhan City, Hubei Province	4
114.147	30.3867	663	135	28	Wuhan Aisha International School, Junshan Street, Caidian District, Wuhan City, Hubei Province	8
114.147	30.3957	508	83	16	Luojiadun, Jingkai Avenue, Junshan Street, Caidian District, Wuhan City, Hubei Province (Bus Station)	7
114.147	30.4047	579	74	15	Tianshuibi Parking Lot (Entry and Exit) of Junshan Street, Caidian District, Wuhan City, Hubei Province, Sunac·Shouxin Jiupai Jiangshan Tianshuibi	7
114.147	30.4137	5617	670	24	Junshan Street, Caidian District, Wuhan City, Hubei Province	8
114.147	30.4227	631	78	0	Changhe Park, Junshan Street, Caidian District, Wuhan City, Hubei Province	5
114.147	30.4316	33	5	1	031 Township Road, Junshan Street, Caidian District, Wuhan City, Hubei Province	5
114.147	30.4406	600	137	20	Lonni Lake Dike, Junshan Street, Caidian District, Wuhan City, Hubei Province	8
114.147	30.4496	3000	620	12	Fourth Ring Road, S40, Chuanyang Street, Caidian District, Wuhan City, Hubei Province	8
114.147	30.4586	989	128	22	Fourth Ring Road, S40, Chuanyang Street, Caidian District, Wuhan City, Hubei Province	8
114.147	30.4676	9178	1607	68	Dongjinghe Road, Dunkou Street, Caidian District, Wuhan City, Hubei Province	8
114.147	30.4765	4346	717	101	Wuhan Export Processing Zone, Chuangye Road, Chuankou Street, Caidian District, Wuhan City, Hubei Province	8
114.147	30.4855	38106	6272	401	Binhu Community, Chuanyang Street, Caidian District, Wuhan City, Hubei Province	8
114.147	30.4945	60159	11383	239	Sanguanheng Road, Chuanyang Street, Caidian District, Wuhan City, Hubei Province	8
114.147	30.5035	56103	9335	107	Huyuan Community, Chuanyang Street, Caidian District, Wuhan City, Hubei Province	8
114.147	30.5125	25902	4090	106	Hubei Province Transportation Comprehensive Administrative Law Enforcement Corps, Chuanyang Street, Caidian District, Wuhan City, Hubei Province	8
114.147	30.5215	21706	3784	95	Building 5, Jinqiao Princeton, Chuanyang Street, Caidian District, Wuhan City, Hubei Province	8
114.147	30.5304	9976	266	0	Mahu Road, Chuanyang Street, Caidian District, Wuhan City, Hubei Province	6
114.147	30.5394	637	72	29	Zhuanghengbafang Yuyangpeng Co., Ltd., Yongfeng Street, Hanyang District, Wuhan City, Hubei Province	8
114.147	30.5484	3475	670	47	Internal ground parking lot of four-season Yongxing, Yongfeng Street, Hanyang District, Wuhan City, Hubei Province (exit)	8
114.147	30.5574	9361	2294	235	Wuhan Hengxin Chuxiong Automobile Sales Service Co., Ltd., Hanyang Avenue, Yongfeng Street, Hanyang District, Wuhan City, Hubei Province	8
114.147	30.5664	1840	256	79	Kuaihuoling Road, Yongfeng Street, Hanyang District, Wuhan City, Hubei Province	8
114.147	30.5753	2883	403	58	Cuidi Jinjiang (Northeast Gate) in Yongfeng Street, Hanyang District, Wuhan City, Hubei Province	8
114.147	30.5843	6124	1444	56	No. 7, Sitai 1st Road, Yongfeng Street, Hanyang District, Wuhan City, Hubei Province	8
114.147	30.5933	3881	473	32	Xianghenan Road, Yongfeng Street, Hanyang District, Wuhan City, Hubei Province	8
114.147	30.6023	5099	1002	128	Wuhan Chengtong Logistics Co., Ltd. (2 gates in the southeast) Zidian Star Charging Station, Cihui Street, Dongxihu District, Wuhan City, Hubei Province	8
114.147	30.6113	10573	1741	1319	New Police Apartment of Wuhan Public Security Bureau, Changqing Street, Dongxihu District, Wuhan City, Hubei Province	9
114.147	30.6203	32927	5695	1825	Mingzhu Community, Wujiashan Street, Dongxihu District, Wuhan City, Hubei Province	9
114.147	30.6292	37057	6599	878	Dutouzui, Jinghe Street, Dongxihu District, Wuhan City, Hubei Province	9
114.147	30.6382	52639	10302	369	No. 1133, Jinshan Avenue, Jinghe Street, Dongxihu District, Wuhan City, Hubei Province	8
114.147	30.6472	35747	4671	331	Jinhai Bay, Jingdong 3rd Road, Jinghe Street, Dongdonghu District, Wuhan City, Hubei Province	8
114.147	30.6562	25164	4267	114	Sanye Shilin Motor (Wuhan) Co., Ltd., No. 157, Sandian Middle Road, Jinghe Street, Dongxihu District, Wuhan City, Hubei Province	8
114.147	30.6652	4225	606	19	Donghai Minshi, Jinghe Street, Donghaihu District, Wuhan City, Hubei Province	8
114.147	30.6741	14241	2800	223	Ocean and World East and West Lake Airport Port Sports Park, Jinghe Street, Dongxihu District, Wuhan City, Hubei Province	8
114.147	30.6831	5245	1352	6	Hangda Aviation Technology Industrial Park, Jinghe Street, Dongxihu District, Wuhan City, Hubei Province	7
114.147	30.6921	6477	267	39	Dongliugang Industrial Park, Zhangbai Road, Baiquan Street, Dongliugang, Dongliu District, Wuhan City, Hubei Province	8
114.147	30.7011	762	74	34	Dugonghu 1st Road, Baiquan Street, Dongxihu District, Wuhan City, Hubei Province	8
114.147	30.7101	7	0	2	226, Lingang Avenue, Baiquan Street, Dongxihu District, Wuhan City, Hubei Province, Wuhan Dugong Lake National Wetland Park	5
114.147	30.7191	368	41	7	Lingang Avenue, Baiquan Street, Dongxihu District, Wuhan City, Hubei Province	7
114.147	30.728	866	73	7	Lingang Avenue, Baiquan Street, Dongxihu District, Wuhan City, Hubei Province	7
114.147	30.737	54	6	3	Yaojiao North Road, Baiquan Street, Dongxihu District, Wuhan City, Hubei Province	6
114.147	30.746	20	4	1	Da Taoyuan, Baiquan Street, Dongxihu District, Wuhan City, Hubei Province	5
114.147	30.755	30	0	3	Baiquan North Road, Baiquan Street, Dongxihu District, Wuhan City, Hubei Province	6
114.147	30.764	2	0	0	Hongxing Brigade, Baiquan Street, Dongxihu District, Wuhan City, Hubei Province	0
114.157	30.1173	45	16	0	On the Hetou, Fasi Street, Jiangxia District, Wuhan City, Hubei Province	4
114.157	30.1263	17	2	0	Heyi Hall, Fasi Street, Jiangxia District, Wuhan City, Hubei Province	2
114.157	30.1352	221	14	3	Shanghetou Road, Fasi Street, Jiangxia District, Wuhan City, Hubei Province	7
114.157	30.1442	33	13	8	Niujiaolong, Fasi Street, Jiangxia District, Wuhan City, Hubei Province	7
114.157	30.1532	2061	184	127	No. 15-35 Xiahetou Road, Fasi Street, Jiangxia District, Wuhan City, Hubei Province	8
114.157	30.1622	252	72	0	No. 134, Fasizhou Road, Fasi Street, Jiangxia District, Wuhan City, Hubei Province	5
114.157	30.1712	2	0	0	G0422 Wuhan-Shenzhen Expressway, Fasi Street, Jiangxia District, Wuhan City, Hubei Province	0
114.157	30.1801	29	10	0	Songjiadun, Fasi Street, Jiangxia District, Wuhan City, Hubei Province	3
114.157	30.1891	7	0	0	Huzui, Fasi Street, Jiangxia District, Wuhan City, Hubei Province	0
114.157	30.1981	7	2	4	G0422 Wuhan-Shenzhen Expressway, Fasi Street, Jiangxia District, Wuhan City, Hubei Province	6
114.157	30.2071	281	24	0	G0422 Wuhan-Shenzhen Expressway, Jinshui Street, Jiangxia District, Wuhan City, Hubei Province	5
114.157	30.2161	2	2	2	G0422 Wuhan-Shenzhen Expressway, Jinshui Street, Jiangxia District, Wuhan City, Hubei Province	5
114.157	30.2251	14	2	2	Gangjian, Jinkou Street, Jiangxia District, Wuhan City, Hubei Province	5
114.157	30.234	265	12	14	G0422 Wuhan-Shenzhen Expressway, Jinkou Street, Jiangxia District, Wuhan City, Hubei Province	7
114.157	30.243	22	3	1	Hujingzhi 2nd Road, Jinkou Street, Jiangxia District, Wuhan City, Hubei Province	5
114.157	30.252	8	2	1	Xiongjiawan, Jinkou Street, Jiangxia District, Wuhan City, Hubei Province	4
114.157	30.261	27	1	2	Shuzhangzui, Jinkou Street, Jiangxia District, Wuhan City, Hubei Province	5
114.157	30.27	55	7	0	Shuzhangzui, Jinkou Street, Jiangxia District, Wuhan City, Hubei Province	3
114.157	30.2789	19	1	0	Original breeding farm of Hubei Academy of Agricultural Sciences Animal Husbandry and Veterinary Research Institute, Jinkou Street, Jiangxia District, Wuhan City, Hubei Province	2
114.157	30.2879	44	5	0	Zaojiao Shu (bus stop) in Jinkou Street, Jiangxia District, Wuhan City, Hubei Province	3
114.157	30.2969	26	6	0	Liaojiawan, Jinkou Street, Jiangxia District, Wuhan City, Hubei Province	3
114.157	30.3149	26	4	1	Pijiazui, Jinkou Street, Jiangxia District, Wuhan City, Hubei Province	5
114.157	30.3239	11	1	0	Changzui, Jinkou Street, Jiangxia District, Wuhan City, Hubei Province	1
114.157	30.3328	24	7	3	Police Office of Jinkou Middle School, Jinkou Street, Jiangxia District, Wuhan City, Hubei Province	6
114.157	30.3418	1180	191	26	Zhongshan Ship Tourism Zone, Jinkou Avenue, Jinkou Street, Jiangxia District, Wuhan City, Hubei Province	8
114.157	30.3508	1279	99	17	Jinjiangnan Industrial Park, South Ring Road, Jingang New District Street, Jiangxia District, Wuhan City, Hubei Province	8
114.157	30.3598	322	26	3	G4 Beijing-Hong Kong-Macao Expressway, Jingang New District Street, Jiangxia District, Wuhan City, Hubei Province	7
114.157	30.3688	3506	443	6	Shugang Avenue, Jingang New District, Jiangxia District, Wuhan City, Hubei Province	7
114.157	30.3777	351	24	1	Wujindi Avenue, Jingang New District, Jiangxia District, Wuhan City, Hubei Province	6
114.157	30.3867	101	16	1	Wujindi Avenue, Jingang New District, Jiangxia District, Wuhan City, Hubei Province	6
114.157	30.3957	28	27	1	Fenglin Road, Junshan Street, Caidian District, Wuhan City, Hubei Province, the first nine schools of Jiangshan Yijiang Fu	5
114.157	30.4047	1544	257	62	S13, Junshan Street, Caidian District, Wuhan City, Hubei Province	8
114.157	30.4137	13490	1855	44	Building 3, Beichen Economic Development and Phase I, Junshan Street, Caidian District, Wuhan City, Hubei Province	8
114.157	30.4227	4362	970	6	Wuhan Economic and Development Changji School, Junshan Street, Caidian District, Wuhan City, Hubei Province	7
114.157	30.4316	383	64	0	Ejiangzuo Line, Junshan Street, Caidian District, Wuhan City, Hubei Province	5
114.157	30.4406	262	49	0	Xujiabao, Junshan Street, Caidian District, Wuhan City, Hubei Province	5
114.157	30.4496	370	115	28	Bailihentong Logistics, Chuankou Street, Caidian District, Wuhan City, Hubei Province	8
114.157	30.4586	2109	831	14	No. 215, Dongjinghe Road, Dunkou Street, Caidian District, Wuhan City, Hubei Province	8
114.157	30.4676	239	35	74	Tanghu Theater Tanghu Park, Chuankou Street, Caidian District, Wuhan City, Hubei Province	8
114.157	30.4765	5125	759	164	Wuhan Export Processing Zone, Zhushanhu Avenue, Zhushanhu Avenue, Chuankou Street, Caidian District, Wuhan City, Hubei Province	8
114.157	30.4855	14069	2871	369	Wuhan Construction Technology Center, 50, Chuangye Road, Chuankou Street, Caidian District, Wuhan City, Hubei Province	8
114.157	30.4945	52652	10872	797	Jinkai Shopping Center, No. 102, Dongfeng Avenue, Chuanyang Street, Caidian District, Wuhan City, Hubei Province	9
114.157	30.5035	39681	6096	555	Vanke Jinyu Lanwan South District, Shenlong Avenue, Chuanyang Street, Caidian District, Wuhan City, Hubei Province	8
114.157	30.5125	20955	4476	159	Jianghan University, Chuanyang Street, Caidian District, Wuhan City, Hubei Province-School of Medicine	8
114.157	30.5215	4020	1107	229	228 Jianghan University, 6, Boxue Road, Chuanyang Street, Caidian District, Wuhan City, Hubei Province	8
114.157	30.5304	1804	219	8	Xiaosaihu, Yongfeng Street, Hanyang District, Wuhan City, Hubei Province	7
114.157	30.5394	609	75	28	Wuhan Qiyu Paper and Plastic Packaging Materials Co., Ltd., Yongfeng Street, Hanyang District, Wuhan City, Hubei Province	8
114.157	30.5484	2217	392	60	Innovation Supermarket, Yongfeng Street, Hanyang District, Wuhan City, Hubei Province	8
114.157	30.5574	3565	609	132	Yida Ceramic Processing Factory, Yongfeng Street, Hanyang District, Wuhan City, Hubei Province, Third Ring International Stone City	8
114.157	30.5664	16966	4649	4	Haoxiang Logistics Lantu Automobile Technology Co., Ltd., Yongfeng Street, Hanyang District, Wuhan City, Hubei Province	7
114.157	30.5753	5046	643	49	Da'an Automobile Testing Center Lantu Automobile Technology Co., Ltd., Yongfeng Street, Hanyang District, Wuhan City, Hubei Province	8
114.157	30.5843	9539	1271	410	Huangjinkou Avenue, Yongfeng Street, Hanyang District, Wuhan City, Hubei Province	8
114.157	30.5933	26872	5183	115	Internal parking lot of Phase 1 of Huangjinkou Binjiang Garden, Yongfeng Street, Hanyang District, Wuhan City, Hubei Province	8
114.157	30.6023	3214	325	128	Duoluokou Freight Farm, Cihui Street, Dongxihu District, Wuhan City, Hubei Province (Chaoyang Road Store)	8
114.157	30.6113	38258	11227	1644	Wuhan Zhanggongdi Greenway, Yijia Street, Qiaokou District, Wuhan City, Hubei Province	9
114.157	30.6203	14212	2735	665	Fuliya Garden, Donghe Summer Palace, Wujiashan Street, Donghehu District, Wuhan City, Hubei Province	8
114.157	30.6292	2605	518	176	Two halls and one center in Donghu District, Wuzhong Street, Jinghe Street, Donghu District, Wuhan City, Hubei Province	8
114.157	30.6382	27487	4783	315	Feili Yinglun, coastal Sailo City, Jinghe Street, Dongxihu District, Wuhan City, Hubei Province	8
114.157	30.6472	29494	4642	192	Donghu District, Jinghe Street, Donghu District, Wuhan City, Hubei Province, crackdown on investment and franchise fraud office, Coastal Sailo City Phase 3	8
114.157	30.6562	19865	4564	32	Jinghe Jinghe Park, Jinghe Street, Dongxihu District, Wuhan City, Hubei Province	8
114.157	30.6652	7375	1310	2	Chuangzhi Jinghe Park, Jinghe Street, Dongxihu District, Wuhan City, Hubei Province	7
114.157	30.6741	2758	420	145	No. 28, Taxi Road, Jinghe Street, Dongxihu District, Wuhan City, Hubei Province	8
114.157	30.6831	13919	2113	42	Wuhan Yunshuiyao City Hotel (Jinghe Street Store) Pioneer Garden Phase 1, Jinghe Street, Dongxihu District, Wuhan City, Hubei Province	8
114.157	30.6921	478	44	3	No. 180, Zhangbai Road, Jinghe Street, Dongxihu District, Wuhan City, Hubei Province	7
114.157	30.7011	388	46	4	Dugonghu Road, Baiquan Street, Dongxihu District, Wuhan City, Hubei Province	7
114.157	30.7101	491	94	0	You can't berry, Baiquan Street, Dongxihu District, Wuhan City, Hubei Province·It's really delicious strawberry picking garden	5
114.157	30.7191	842	92	10	G42 Shanghai-Chengdu Expressway, Baiquan Street, Dongxihu District, Wuhan City, Hubei Province	7
114.157	30.728	666	160	1	Lingang Avenue, Baiquan Street, Dongxihu District, Wuhan City, Hubei Province	7
114.157	30.737	420	56	3	Water lily lotus production base of Wuhan Keshuo Technology Co., Ltd., Baiquan Street, Dongxihu District, Wuhan City, Hubei Province	7
114.157	30.746	99	6	0	East-West Lake Dike, Baiquan Street, Dongxihu District, Wuhan City, Hubei Province	4
114.157	30.755	4	0	0	Xiagang, Baiquan Street, Dongxihu District, Wuhan City, Hubei Province	0
114.157	30.8807	3	0	0	Wangjiaxiafan, Qijiawan Street, Huangpi District, Wuhan City, Hubei Province	0
114.157	30.8987	10	2	0	Mingjiadun, Qijiawan Street, Huangpi District, Wuhan City, Hubei Province	2
114.168	30.1083	39	0	4	Nongjigou, Fasi Street, Jiangxia District, Wuhan City, Hubei Province	6
114.168	30.1173	60	11	1	On the Hetou, Fasi Street, Jiangxia District, Wuhan City, Hubei Province	5
114.168	30.1352	123	3	4	Shanghetou Road, Fasi Street, Jiangxia District, Wuhan City, Hubei Province	6
114.168	30.1532	34	16	76	No. 1-39, Mafa Line, Fasi Street, Jiangxia District, Wuhan City, Hubei Province	8
114.168	30.1622	1131	95	37	Fasi Middle School, Fasi Street, Jiangxia District, Wuhan City, Hubei Province	8
114.168	30.1712	73	3	3	Lao Guizi Mountain, Fasi Street, Jiangxia District, Wuhan City, Hubei Province	6
114.168	30.1801	89	10	1	Fahua Road, Fasi Street, Jiangxia District, Wuhan City, Hubei Province	5
114.168	30.1891	6	2	1	Yangjiafan, Fasi Street, Jiangxia District, Wuhan City, Hubei Province	4
114.168	30.1981	29	0	0	Wubaodun, Fasi Street, Jiangxia District, Wuhan City, Hubei Province	1
114.168	30.2071	2	0	0	Branch Committee of the Communist Party of China Flower Basketball Brigade, Fasi Street, Jiangxia District, Wuhan City, Hubei Province	0
114.168	30.2161	6	4	0	G0422 Wuhan-Shenzhen Expressway, Jinshui Street, Jiangxia District, Wuhan City, Hubei Province	2
114.168	30.234	95	18	3	G0422 Wuhan-Shenzhen Expressway, Jinkou Street, Jiangxia District, Wuhan City, Hubei Province	6
114.168	30.243	9	0	0	Hujingzhi 2nd Road, Jinkou Street, Jiangxia District, Wuhan City, Hubei Province	0
114.168	30.252	50	10	0	Wangjiazui, Jinkou Street, Jiangxia District, Wuhan City, Hubei Province	4
114.168	30.261	258	77	7	Huanyuan West Road, Jinkou Street, Jiangxia District, Wuhan City, Hubei Province	7
114.168	30.27	53	13	4	Huanyuan West Road, Jinkou Street, Jiangxia District, Wuhan City, Hubei Province	7
114.168	30.2789	48	4	0	Wanjiazui, Jinkou Street, Jiangxia District, Wuhan City, Hubei Province	3
114.168	30.2879	449	31	1	045 Township Road, Jinkou Street, Jiangxia District, Wuhan City, Hubei Province	6
114.168	30.2969	21	2	0	Li, Shanpo, Jinkou Street, Jiangxia District, Wuhan City, Hubei Province	2
114.168	30.3149	197	104	0	Zhaojiawan, Jinkou Street, Jiangxia District, Wuhan City, Hubei Province	5
114.168	30.3239	14	6	0	Yunnanling, Jinkou Street, Jiangxia District, Wuhan City, Hubei Province	3
114.168	30.3328	8	0	2	Runan Road, Jinkou Street, Jiangxia District, Wuhan City, Hubei Province	5
114.168	30.3418	2264	248	6	Tuchuan Road, Jinkou Street, Jiangxia District, Wuhan City, Hubei Province	7
114.168	30.3508	1230	41	12	G4 Beijing-Hong Kong-Macao Expressway, Jingang New District Street, Jiangxia District, Wuhan City, Hubei Province	7
114.168	30.3598	205	25	33	Tianguangshan Street, Jingang New District, Jiangxia District, Wuhan City, Hubei Province	8
114.168	30.3688	1222	102	9	Pan Asia Auto Avenue, Jingang New District, Jiangxia District, Wuhan City, Hubei Province	7
114.168	30.3777	977	199	8	Office building of Anji Automobile Logistics (Hubei) Co., Ltd., Jingang New District, Jiangxia District, Wuhan City, Hubei Province	7
114.168	30.3867	678	45	1	Wujinti Road, Jingang New District, Jiangxia District, Wuhan City, Hubei Province	6
114.168	30.3957	5	0	0	Wujinti Road, Jingang New District, Jiangxia District, Wuhan City, Hubei Province	0
114.168	30.4047	226	43	5	Building 8, Shidi Junlantingan, Junshan Street, Caidian District, Wuhan City, Hubei Province	7
114.168	30.4137	445	90	46	Phase 1, Hailun Town, Junshan Street, Caidian District, Wuhan City, Hubei Province	8
114.168	30.4227	853	85	2	Wuhan Economic and Development Changji School, Junshan Street, Caidian District, Wuhan City, Hubei Province	7
114.168	30.4316	40	5	1	Lianyi Sand Farm, Junshan Street, Caidian District, Wuhan City, Hubei Province	5
114.168	30.4406	553	74	3	Wuhan Zhongjiao Dunkou Yangtze River Bridge Investment Co., Ltd., Junshan Street, Caidian District, Wuhan City, Hubei Province	7
114.168	30.4496	57	19	1	Caidian Reed Farm, Junshan Street, Caidian District, Wuhan City, Hubei Province	6
114.168	30.4586	6516	811	36	Tanghu Park, No. 110, Dongjinghe Road, Chuankou Street, Caidian District, Wuhan City, Hubei Province	8
114.168	30.4676	13392	3174	41	Tanghu Park, Chuankou Street, Caidian District, Wuhan City, Hubei Province	8
114.168	30.4765	11591	1972	117	Wuhan Haokang Fitness Equipment Co., Ltd., Chuangye 5th Road, Chuankou Street, Caidian District, Wuhan City, Hubei Province	8
114.168	30.4855	21886	3011	29	Dongfeng New Energy Vehicle Industrial Park, Dunyang Avenue, Dunkou Street, Caidian District, Wuhan City, Hubei Province	8
114.168	30.4945	23000	4067	641	Shengshi Tianai Physical Examination Center (Dunkoudian) Shengshi Jinjiang Hotel, Chuankou Street, Caidian District, Wuhan City, Hubei Province	8
114.168	30.5035	94280	7229	329	Wuhan Sports Center, Chuankou Street, Caidian District, Wuhan City, Hubei Province	8
114.168	30.5125	46721	11510	68	Building 37, Xiangzhangyuan, Chuanyang Street, Caidian District, Wuhan City, Hubei Province	8
114.168	30.5215	2537	559	37	Talent training base of Jianghan University Liangzihu Golf Club Co., Ltd., Chuanyang Street, Caidian District, Wuhan City, Hubei Province	8
114.168	30.5304	774	110	4	Sanjiao Hubei Road, Chuanyang Street, Caidian District, Wuhan City, Hubei Province	7
114.168	30.5394	2004	417	18	Wuhan Zhenfeng Jinsheng Metal Structure Co., Ltd., Chuanyang Street, Caidian District, Wuhan City, Hubei Province	8
114.168	30.5484	1794	648	63	Chenjiazui Bridge, Yongfeng Street, Hanyang District, Wuhan City, Hubei Province	8
114.168	30.5574	1704	249	67	Building 47, Chenwan, Yongfeng Street, Hanyang District, Wuhan City, Hubei Province	8
114.168	30.5664	77111	13846	163	Yongfeng Ring Road, Yongfeng Street, Hanyang District, Wuhan City, Hubei Province	8
114.168	30.5753	13929	3135	26	Entrance to S15 Hancai Expressway, Yongfeng Street, Hanyang District, Wuhan City, Hubei Province (direction of Hanyang)	8
114.168	30.5843	26173	1988	278	Wuhan Jinniu Economic Development Co., Ltd., Yongfeng Street, Hanyang District, Wuhan City, Hubei Province	8
114.168	30.5933	11855	2259	137	No. 6, Budweiser Road, Yongfeng Street, Hanyang District, Wuhan City, Hubei Province	8
114.168	30.6023	1900	342	9	Donghu Dadi Duluokou River Beach Park, Cihui Street, Dongxihu District, Wuhan City, Hubei Province	7
114.168	30.6113	21855	2086	225	Hongda Solar Energy Lamp Factory, Changqing Street, Dongxihu District, Wuhan City, Hubei Province	8
114.168	30.6203	48217	11907	854	Zhangbi Lake Zhangbi Lake Park, Yijia Street, Qiaokou District, Wuhan City, Hubei Province	9
114.168	30.6292	17111	2165	85	Jinyinhu Street, Dongxihu District, Wuhan City, Hubei Province Tiantian Driving School Jinhai Industrial Park	8
114.168	30.6382	24627	4188	83	Huanghelou Science and Technology Park, Xinqiao 2nd Road, Jinyinhu Street, Dongxihu District, Wuhan City, Hubei Province	8
114.168	30.6472	4291	886	141	Xiangsheng Baijingwan Juncheng, Haikou 2nd Road, Jinyinhu Street, Dongxihu District, Wuhan City, Hubei Province	8
114.168	30.6562	6391	1212	111	Bodahai Lan Bay, Jinyinhu Street, Dongxihu District, Wuhan City, Hubei Province	8
114.168	30.6652	28680	5852	461	Phase 2 of Huanian Huan Huan Road, Jinyinhu Street, Dongxihu District, Wuhan City, Hubei Province	8
114.168	30.6741	10848	1037	223	Harmonious city, Jinghe Street, Dongxihu District, Wuhan City, Hubei Province	8
114.168	30.6831	11844	1690	184	Lingdian Electrical Control New Energy Electrical Control Industrial Park, Bihu Road, Jinghe Street, Dongxihu District, Wuhan City, Hubei Province	8
114.168	30.6921	1085	193	2	Fengqili Road, Jinghe Street, Dongxihu District, Wuhan City, Hubei Province	7
114.168	30.7011	161	63	17	Yinbai Road, Baiquan Street, Dongxihu District, Wuhan City, Hubei Province	7
114.168	30.7101	99	15	24	You can't berry, Baiquan Street, Dongxihu District, Wuhan City, Hubei Province·It's really delicious strawberry picking garden	7
114.168	30.7191	73	11	10	Yinbai East Road, Baiquan Street, Dongxihu District, Wuhan City, Hubei Province	7
114.168	30.728	901	192	3	Gaojiadun Road, Baiquan Street, Dongxihu District, Wuhan City, Hubei Province	7
114.168	30.737	20	0	0	East-West Lake Dike, Baiquan Street, Dongxihu District, Wuhan City, Hubei Province	1
114.168	30.746	138	17	0	East-West Lake Dike, Baiquan Street, Dongxihu District, Wuhan City, Hubei Province	4
114.168	30.755	217	29	1	Airport Port Avenue, Panlongcheng Economic Development Zone, Huangpi District, Wuhan City, Hubei Province	6
114.168	30.8358	10	0	0	080 Township Road, Qijiawan Street, Huangpi District, Wuhan City, Hubei Province	0
114.168	30.8538	3	0	0	080 Township Road, Qijiawan Street, Huangpi District, Wuhan City, Hubei Province	0
114.168	30.8897	52	6	7	Provincial Road 110, Qijiawan Street, Huangpi District, Wuhan City, Hubei Province	7
114.168	30.8987	79	4	5	079 Township Road, Qijiawan Street, Huangpi District, Wuhan City, Hubei Province	7
114.168	30.9077	53	7	3	Jingtangwan, Jianshe Village, Qijiawan Street, Qijiawan Street, Huangpi District, Wuhan City, Hubei Province (Bus Station)	6
114.168	30.9167	13	0	3	Dongwugang, Qijiawan Street, Huangpi District, Wuhan City, Hubei Province	5
114.168	30.9256	16	9	0	Mingziyang, Qijiawan Street, Huangpi District, Wuhan City, Hubei Province	3
114.168	30.9346	40	9	0	Daming Jiawu, Qijiawan Street, Huangpi District, Wuhan City, Hubei Province	3
114.168	30.9436	26	5	0	Changjiawan, Qijiawan Street, Huangpi District, Wuhan City, Hubei Province	3
114.168	30.9526	627	189	2	Old house yellow, Qijiawan Street, Huangpi District, Wuhan City, Hubei Province	7
114.168	31.0244	20	0	1	Sijiaxiaowan (bus stop) in Guanjiazhai Village, Lijiaji Street, Lijiaji Street, Huangpi District, Wuhan City, Hubei Province	4
114.168	31.0334	30	0	0	Xiasiwu, Lijiaji Street, Huangpi District, Wuhan City, Hubei Province	1
114.168	31.0424	4	0	0	Xiazhuyuan, Lijiaji Street, Huangpi District, Wuhan City, Hubei Province	0
114.178	30.0993	70	8	0	Xinhebei Village, Fasi Street, Jiangxia District, Wuhan City, Hubei Province	4
114.178	30.1083	143	2	2	Nongjigou, Fasi Street, Jiangxia District, Wuhan City, Hubei Province	6
114.178	30.1173	44	0	0	Yaochang Village, Fasi Street, Jiangxia District, Wuhan City, Hubei Province	2
114.178	30.1263	10	1	0	Xialiugu, Fasi Street, Jiangxia District, Wuhan City, Hubei Province	1
114.178	30.1352	106	5	0	Shanghetou Road, Fasi Street, Jiangxia District, Wuhan City, Hubei Province	4
114.178	30.1442	9	0	0	Xiashehu, Fasi Street, Jiangxia District, Wuhan City, Hubei Province	0
114.178	30.1532	167	49	14	Yishanwan Street, Fasi Street, Jiangxia District, Wuhan City, Hubei Province	7
114.178	30.1622	163	20	3	Fasi Gas Station, Fasi Street, Jiangxia District, Wuhan City, Hubei Province	7
114.178	30.1712	14	4	0	Mengjiafan, Fasi Street, Jiangxia District, Wuhan City, Hubei Province	2
114.178	30.1801	8	0	1	Maotianfan, Fasi Street, Jiangxia District, Wuhan City, Hubei Province	3
114.178	30.1891	265	5	1	Fahua Road, Fasi Street, Jiangxia District, Wuhan City, Hubei Province	5
114.178	30.1981	36	0	0	Fahua Road, Fasi Street, Jiangxia District, Wuhan City, Hubei Province	1
114.178	30.2251	2	0	0	Huixianwan, Jinkou Street, Jiangxia District, Wuhan City, Hubei Province	0
114.178	30.234	2	0	2	Huixianwan, Jinkou Street, Jiangxia District, Wuhan City, Hubei Province	4
114.178	30.252	214	16	0	Mixiao Junziyuan Parking Parking Lot, Jinkou Street, Jiangxia District, Wuhan City, Hubei Province	4
114.178	30.261	68	42	8	Luhu Service Area of ​​Wushen Expressway, G0422, Jinkou Street, Jiangxia District, Wuhan City, Hubei Province (Wushen Expressway Wuhan direction)	7
114.178	30.27	25	4	2	Shentanglong, Jinkou Street, Jiangxia District, Wuhan City, Hubei Province	6
114.178	30.2789	28	5	0	In front of the ancestral hall in Jinkou Street, Jiangxia District, Wuhan City, Hubei Province	3
114.178	30.2879	38	2	3	G0422 Wuhan-Shenzhen Expressway, Jinkou Street, Jiangxia District, Wuhan City, Hubei Province	6
114.178	30.2969	19	6	0	Li, Shanpo, Jinkou Street, Jiangxia District, Wuhan City, Hubei Province	3
114.178	30.3059	30	8	0	Xiashan Village, Jinkou Street, Jiangxia District, Wuhan City, Hubei Province	3
114.178	30.3149	10	4	0	Meilijia, Jinkou Street, Jiangxia District, Wuhan City, Hubei Province	2
114.178	30.3239	61	2	1	Meilijia, Jinkou Street, Jiangxia District, Wuhan City, Hubei Province	5
114.178	30.3328	20	2	0	Maozishan, Jinkou Street, Jiangxia District, Wuhan City, Hubei Province	2
114.178	30.3418	155	21	6	South Ring Road, Jinkou Street, Jiangxia District, Wuhan City, Hubei Province Animal Husbandry and Veterinary Research Institute of Wuhan Academy of Agricultural Sciences	7
114.178	30.3508	489	21	2	South Ring Road, Jinkou Street, Jiangxia District, Wuhan City, Hubei Province	6
114.178	30.3598	278	27	4	Mingjiangliang Materials All-aluminum Home Intelligent Industry Base, Jingang New District, Jiangxia District, Wuhan City, Hubei Province	7
114.178	30.3688	221	26	0	Jinlong Street, Jingang New District, Jiangxia District, Wuhan City, Hubei Province	5
114.178	30.3777	3640	235	14	Siweier Wanjing Wuhan Hongxing Precision Forging Co., Ltd., Jingang New District, Jiangxia District, Wuhan City, Hubei Province	8
114.178	30.3867	883	15	4	Wuhan Branch of Yanjia Wharf, Jingang New District, Jiangxia District, Wuhan City, Hubei Province	7
114.178	30.3957	464	28	1	Wujinti Road, Jingang New District, Jiangxia District, Wuhan City, Hubei Province	6
114.178	30.4047	47	8	0	Wuhan Xinzhigan Trading Co., Ltd., Zhangjiawan Street, Hongshan District, Wuhan City, Hubei Province	3
114.178	30.4227	7	0	3	Zuoan Avenue, Junshan Street, Caidian District, Wuhan City, Hubei Province	5
114.178	30.4316	8	1	0	Zuoan Avenue, Junshan Street, Caidian District, Wuhan City, Hubei Province	1
114.178	30.4406	141	37	0	Fourth Ring Road S40, Junshan Street, Caidian District, Wuhan City, Hubei Province	5
114.178	30.4496	299	65	1	Caidian Reed Farm, Junshan Street, Caidian District, Wuhan City, Hubei Province	6
114.178	30.4586	13586	2086	97	Fenghua Reed Bank, No. 309 Wanjiahu Road, Dunkou Street, Caidian District, Wuhan City, Hubei Province	8
114.178	30.4676	17888	3424	89	No. 202, Wanjiahu Road, Dunkou Street, Caidian District, Wuhan City, Hubei Province Wuhan City, Wuhan	8
114.178	30.4765	6253	1346	51	Dongfeng Honda Automobile Co., Ltd. (First Factory)	8
114.178	30.4855	15558	3475	21	No. 55, Shenlong Avenue, Chuankou Street, Caidian District, Wuhan City, Hubei Province	8
114.178	30.4945	52705	10552	207	Wuhan Dongfeng Hongtai Business Consulting Co., Ltd. (Science and Science Park 2nd Road)	8
114.178	30.5035	26358	5298	851	Vanke Jade Jiuxi, Yi East Road, Chuankou Street, Caidian District, Wuhan City, Hubei Province	9
114.178	30.5125	39643	6881	460	Building 34, Xiangzhangyuan, Chuanyang Street, Caidian District, Wuhan City, Hubei Province Wuhan City, Hubei Province Wuhan Construction·Yunqi Lakeshore (under construction)	8
114.178	30.5215	24286	4474	117	Building B2-12, Yihu Residence, Jinse Harbor, Chuanyang Street, Caidian District, Wuhan City, Hubei Province	8
114.178	30.5304	30564	5807	47	Third Ring Road, Third Ring Road, Chuanyang Street, Caidian District, Wuhan City, Hubei Province	8
114.178	30.5394	12529	2519	75	Aunt Yao roasted whole lamb in Chuanyang Street, Caidian District, Wuhan City, Hubei Province (Hanyang Main Store)	8
114.178	30.5484	1972	445	5	Yujiawan, Longyang Street, Hanyang District, Wuhan City, Hubei Province	7
114.178	30.5574	12688	286	4	Yixin Garden, Moshui Hubei Road, Yongfeng Street, Hanyang District, Wuhan City, Hubei Province	7
114.178	30.5664	15983	3238	170	Wuhan Borui Environmental Energy Development Co., Ltd., Yongfeng Street, Hanyang District, Wuhan City, Hubei Province (Xianniaoshan Road)	8
114.178	30.5753	31038	5452	75	Parking lot of Hongkun Hotel, Yongfeng Street, Hanyang District, Wuhan City, Hubei Province	8
114.178	30.5843	13782	1752	45	Hanjiang River Beach, Zhiyin Avenue, Yongfeng Street, Hanyang District, Wuhan City, Hubei Province	8
114.178	30.5933	24149	3396	41	Phase 3, Hanyang Hanjiang River Beach, Xianghenan Road, Yongfeng Street, Hanyang District, Wuhan City, Hubei Province	8
114.178	30.6023	17303	1007	27	Wuhan Shenzhou Anticorrosion Wood Factory, Gongnong Road, Yijia Street, Qiaokou District, Wuhan City, Hubei Province	8
114.178	30.6113	63546	6767	225	No. 56, Changfeng Avenue, Yijia Street, Qiaokou District, Wuhan City, Hubei Province (under construction)	8
114.178	30.6203	5448	1146	67	Phase 3 of Watson Hankou City Plaza, No. 4, Zhangzhu Road, Yijia Street, Qiaokou District, Wuhan City, Hubei Province	8
114.178	30.6292	22453	3293	140	No. 1264, Jinshan Avenue, Jinyinhu Street, Dongxihu District, Wuhan City, Hubei Province	8
114.178	30.6382	8776	1175	252	Jinshan Avenue, Jinyinhu Street, Dongxihu District, Wuhan City, Hubei Province	8
114.178	30.6472	1646	441	1	Jinyinhu Greenway, Jinyinhu Street, Dongxihu District, Wuhan City, Hubei Province	7
114.178	30.6562	985	216	26	No. 38 Huanhu Road, Jinyinhu Street, Dongxihu District, Wuhan City, Hubei Province Vanke Four Seasons Flower City West Peninsula	8
114.178	30.6652	437	70	30	Jinshida Industrial (Wuhan) Co., Ltd., Jinyinhu Street, Dongxihu District, Wuhan City, Hubei Province	8
114.178	30.6741	1174	350	72	Wuhan Jieruida Industrial Park, No. 12, Huanhu Middle Road, Jinyinhu Street, Dongxihu District, Wuhan City, Hubei Province	8
114.178	30.6831	2730	449	128	Wuhan Fuye Paper Co., Ltd., Jinghe Street, Dongxihu District, Wuhan City, Hubei Province	8
114.178	30.6921	637	189	4	Wentai Road, Jinghe Street, Dongxihu District, Wuhan City, Hubei Province	7
114.178	30.7011	145	40	5	Xinhu Farm Fishing Park, Baiquan Street, Dongxihu District, Wuhan City, Hubei Province	7
114.178	30.7101	115	39	2	East-West Lake Dike, Baiquan Street, Dongxihu District, Wuhan City, Hubei Province	6
114.178	30.7191	68	10	1	Ground parking lot (entry and exit) in Baiquan Street, Dongxihu District, Wuhan City, Hubei Province	5
114.178	30.728	339	48	3	Baiquan Parking Area, Baiquan Street, Dongxihu District, Wuhan City, Hubei Province (direction of Shanghai-Chengdu Expressway)	7
114.178	30.737	16	1	2	East-West Lake Dike, Baiquan Street, Dongxihu District, Wuhan City, Hubei Province	5
114.178	30.746	1	0	1	Airport Port Avenue, Panlongcheng Economic Development Zone, Huangpi District, Wuhan City, Hubei Province	3
114.178	30.7819	3	2	0	Tongjiahu Aquaculture Professional Cooperative, Huangpi District, Qijiawan Street, Huangpi District, Wuhan City, Hubei Province	1
114.178	30.7909	7	0	0	Zhao Sanjun, Qijiawan Street, Huangpi District, Wuhan City, Hubei Province	0
114.178	30.7999	4	0	0	Zhao Sanjun, Tianhe Street, Huangpi District, Wuhan City, Hubei Province	0
114.178	30.8179	2	0	0	Chentian Avenue, Qijiawan Street, Huangpi District, Wuhan City, Hubei Province	0
114.178	30.8268	29	6	0	Jiehe, Qijiawan Street, Huangpi District, Wuhan City, Hubei Province	3
114.178	30.8448	178	13	1	080 Township Road, Qijiawan Street, Huangpi District, Wuhan City, Hubei Province	6
114.178	30.8538	16	3	0	Xiaxuzhai, Qijiawan Street, Huangpi District, Wuhan City, Hubei Province	2
114.178	30.8628	5	0	0	080 Township Road, Qijiawan Street, Huangpi District, Wuhan City, Hubei Province	0
114.178	30.8718	20	8	4	078 Township Road, Qijiawan Street, Huangpi District, Wuhan City, Hubei Province	6
114.178	30.8807	18	0	3	Dali Jun, Qijiawan Street, Huangpi District, Wuhan City, Hubei Province	5
114.178	30.8897	112	37	27	Deep Love Hotel, Qijiawan Street, Huangpi District, Wuhan City, Hubei Province	7
114.178	30.8987	47	7	1	079 Township Road, Qijiawan Street, Huangpi District, Wuhan City, Hubei Province	5
114.178	30.9077	89	8	0	Zhangjiahe, Qijiawan Street, Huangpi District, Wuhan City, Hubei Province	4
114.178	30.9167	55	9	0	Banbianzhai, Qijiawan Street, Huangpi District, Wuhan City, Hubei Province	4
114.178	30.9256	203	22	1	Yusenzhai, Qijiawan Street, Huangpi District, Wuhan City, Hubei Province	6
114.178	30.9346	15	2	9	Hongxing Primary School, Qijiawan Street, Huangpi District, Wuhan City, Hubei Province	7
114.178	30.9436	51	10	6	Miaozhou, Qijiawan Street, Huangpi District, Wuhan City, Hubei Province	7
114.178	30.9526	175	3	5	083 Township Road, Qijiawan Street, Huangpi District, Wuhan City, Hubei Province	7
114.178	30.9616	2	0	2	083 Township Road, Qijiawan Street, Huangpi District, Wuhan City, Hubei Province	4
114.178	30.9706	19	0	0	Huangpi Small House, Qijiawan Street, Huangpi District, Wuhan City, Hubei Province	1
114.178	30.9885	7	0	1	Huangxiao Avenue, Lijiaji Street, Huangpi District, Wuhan City, Hubei Province	3
114.178	30.9975	29	5	11	Huangxiao Avenue, Lijiaji Street, Huangpi District, Wuhan City, Hubei Province	7
114.178	31.0155	75	14	11	037 Township Road, Lijiaji Street, Huangpi District, Wuhan City, Hubei Province	7
114.178	31.0244	8	2	4	Xiasiwu, Lijiaji Street, Huangpi District, Wuhan City, Hubei Province	6
114.178	31.0334	39	0	12	Xiasiwu, Lijiaji Street, Huangpi District, Wuhan City, Hubei Province	7
114.178	31.0424	87	7	0	Cuijianggang, Lijiaji Street, Huangpi District, Wuhan City, Hubei Province	4
114.178	31.0514	28	4	0	Half of the wall of Lijiaji Street, Huangpi District, Wuhan City, Hubei Province	3
114.189	30.0993	18	3	0	Xinhebei Village, Fasi Street, Jiangxia District, Wuhan City, Hubei Province	2
114.189	30.1083	39	0	0	Futou Mountain, Fasi Street, Jiangxia District, Wuhan City, Hubei Province	2
114.189	30.1173	11	0	1	Sanjiaohu Village, Fasi Street, Jiangxia District, Wuhan City, Hubei Province	4
114.189	30.1263	16	0	0	Zhongshehuzha Village, Fasi Street, Jiangxia District, Wuhan City, Hubei Province	1
114.189	30.1442	14	2	0	Lijiawan, Fasi Street, Jiangxia District, Wuhan City, Hubei Province	2
114.189	30.1532	11	6	3	Yishanwan Street, Fasi Street, Jiangxia District, Wuhan City, Hubei Province	6
114.189	30.1622	519	22	5	Chen, Dalu, Fasi Street, Jiangxia District, Wuhan City, Hubei Province	7
114.189	30.1712	23	0	5	Datouzui, Fasi Street, Jiangxia District, Wuhan City, Hubei Province	6
114.189	30.1801	8	0	0	Maqihu, Fasi Street, Jiangxia District, Wuhan City, Hubei Province	0
114.189	30.1891	1	0	0	Fahua Road, Fasi Street, Jiangxia District, Wuhan City, Hubei Province	0
114.189	30.1981	69	0	0	Xiwandi, Fasi Street, Jiangxia District, Wuhan City, Hubei Province	2
114.189	30.2071	174	2	0	Fahua Road, Fasi Street, Jiangxia District, Wuhan City, Hubei Province	3
114.189	30.252	3	0	0	Binhu Road, Jinkou Street, Jiangxia District, Wuhan City, Hubei Province	0
114.189	30.261	4	1	1	Aijiawan, Jinkou Street, Jiangxia District, Wuhan City, Hubei Province	4
114.189	30.27	19	1	2	Pinnong Residence, Jinkou Street, Jiangxia District, Wuhan City, Hubei Province	5
114.189	30.2789	105	3	0	Hujing West 1st Road, Jinkou Street, Jiangxia District, Wuhan City, Hubei Province	3
114.189	30.2969	16	4	0	Xiong Jiahai, Jinkou Street, Jiangxia District, Wuhan City, Hubei Province	2
114.189	30.3059	12	8	0	G0422 Wuhan-Shenzhen Expressway, Jinkou Street, Jiangxia District, Wuhan City, Hubei Province	3
114.189	30.3149	5	1	0	Meilijia, Jinkou Street, Jiangxia District, Wuhan City, Hubei Province	1
114.189	30.3239	20	2	4	Xiongxiangtang, Jinkou Street, Jiangxia District, Wuhan City, Hubei Province	6
114.189	30.3328	30	5	0	G0422 Wuhan-Shenzhen Expressway, Jinkou Street, Jiangxia District, Wuhan City, Hubei Province	3
114.189	30.3418	1670	191	45	No. 2, South Ring Road, Jinkou Street, Jiangxia District, Wuhan City, Hubei Province, Animal Husbandry and Veterinary Research Institute of Wuhan Academy of Agricultural Sciences	8
114.189	30.3508	23	2	0	Jingangshan, Jingang New District, Jiangxia District, Wuhan City, Hubei Province	2
114.189	30.3598	112	38	0	Auxiliary Road, SAIC General Avenue, Jingang New District, Jiangxia District, Wuhan City, Hubei Province	5
114.189	30.3688	133	14	7	Wuhan Aoliwei Auto Parts Co., Ltd., Jingang New District Street, Jiangxia District, Wuhan City, Hubei Province Yatong Auto Parts (Wuhan) Co., Ltd.	7
114.189	30.3777	2111	367	26	Chevrolet Avenue, Jingang New District, Jiangxia District, Wuhan City, Hubei Province	8
114.189	30.3867	2850	99	10	Wuhan Branch of SAIC General Motors Co., Ltd., Jingang New District Street, Jiangxia District, Wuhan City, Hubei Province	7
114.189	30.3957	976	32	2	Buick Avenue, Qingling Street, Hongshan District, Wuhan City, Hubei Province	7
114.189	30.4047	98	16	1	Wuhan Xinzhigan Trading Co., Ltd., Zhangjiawan Street, Hongshan District, Wuhan City, Hubei Province	6
114.189	30.4137	13	0	0	Wujinti Road, Zhangjiawan Street, Hongshan District, Wuhan City, Hubei Province	1
114.189	30.4227	52	4	0	Wujinti Road, Zhangjiawan Street, Hongshan District, Wuhan City, Hubei Province	3
114.189	30.4316	143	25	0	Fourth Ring Road, S40, Zhangjiawan Street, Hongshan District, Wuhan City, Hubei Province	5
114.189	30.4496	50	29	1	Lannihu Dike, Chuankou Street, Caidian District, Wuhan City, Hubei Province	6
114.189	30.4586	9369	1066	173	Jianhua Community (area A) Jianhua Community, Dunkou Street, Caidian District, Wuhan City, Hubei Province	8
114.189	30.4676	5957	590	46	Jiangcheng Avenue, Chuankou Street, Caidian District, Wuhan City, Hubei Province	8
114.189	30.4765	4292	673	115	Special Dean Charging Station, Dunkou Street, Caidian District, Wuhan City, Hubei Province (Wuhan No. 1 Bus Charging Station)	8
114.189	30.4855	26493	5451	108	Wanjiahu Road, Dunkou Street, Caidian District, Wuhan City, Hubei Province	8
114.189	30.4945	915	194	90	Chuanggu Science and Technology Building, Science and Technology Park, Chuankou Street, Caidian District, Wuhan City, Hubei Province	8
114.189	30.5035	4820	633	25	Guanlan Imperial Garden, Jiangdi Street, Hanyang District, Wuhan City, Hubei Province (Phase 2) Guanlan Imperial Garden Phase 2	8
114.189	30.5125	60297	10582	256	Wuhan Experimental Foreign Language School Primary School, Chuanyang Street, Caidian District, Wuhan City, Hubei Province Wuhan Experimental Foreign Language School	8
114.189	30.5215	14732	2206	102	Hanyang Passenger Transport Center (Entry) Promoted to Guandu Bus Plaza, Chuanyang Street, Caidian District, Wuhan City, Hubei Province	8
114.189	30.5304	54899	9916	658	No. 67, Sixin South Road, Chuanyang Street, Caidian District, Wuhan City, Hubei Province Qingao·Urban Shangchao	9
114.189	30.5394	95075	20888	221	Poly Chanson Fontainebleau, Longyang Street, Hanyang District, Wuhan City, Hubei Province	8
114.189	30.5484	82762	13938	150	Vanke Hanyang International Area A, Taojialing Ring Road, Longyang Street, Hanyang District, Wuhan City, Hubei Province	8
114.189	30.5574	9044	1345	18	The Eighth Vision Team of Longyang Street, Hanyang District, Wuhan City, Hubei Province	8
114.189	30.5664	44769	7611	145	Xiannvshan Road, Yongfeng Street, Hanyang District, Wuhan City, Hubei Province	8
114.189	30.5753	24744	3253	201	Yangcheng·Hanjiangyuan, Rose Street, Yongfeng Street, Hanyang District, Wuhan City, Hubei Province	8
114.189	30.5843	3293	549	57	Apartment No. 6, Kindergarten, Gutian Street, Qiaokou District, Wuhan City, Hubei Province	8
114.189	30.5933	22638	3265	740	Hongxing Jiayuan, Gutian Road, Gutian Street, Qiaokou District, Wuhan City, Hubei Province	9
114.189	30.6023	34735	7188	340	Fenghui, Nanniwan Avenue, Changfeng Street, Qiaokou District, Wuhan City, Hubei Province	8
114.189	30.6113	61257	10117	546	Dongfenglisongheyuan, Changfeng Avenue Elevated Road, Changfeng Street, Qiaokou District, Wuhan City, Hubei Province	8
114.189	30.6203	23204	3382	65	Cherry Tree Kindergarten, Zhukakou District, Changfeng Street, Qiaokou District, Wuhan City, Hubei Province	8
114.189	30.6292	25147	4377	171	Jinhu Home E District (Nanmen) Lingyun Technology Group Co., Ltd., Jinyinhu Street, Dongxihu District, Wuhan City, Hubei Province	8
114.189	30.6382	8953	1580	15	Jinhu Home Lingyun Jinhu Home Area E, Jinyinhu Street, Dongxihu District, Wuhan City, Hubei Province	8
114.189	30.6472	17070	2548	25	Jinyinhu Greenway, Jinyinhu Street, Dongxihu District, Wuhan City, Hubei Province	8
114.189	30.6562	1926	271	4	Jinyinhu Greenway, Jinyinhu Street, Dongxihu District, Wuhan City, Hubei Province	7
114.189	30.6652	12	2	0	Jinyinhu Greenway, Jinyinhu Street, Dongxihu District, Wuhan City, Hubei Province	2
114.189	30.6741	6743	644	7	Wuhan Cigarette Factory, Jinyinhu Street, Dongxihu District, Wuhan City, Hubei Province	7
114.189	30.6831	1953	630	49	Defengen, Jinghe Street, Dongxihu District, Wuhan City, Hubei Province	8
114.189	30.6921	3518	262	2	East-West Lake Dike, Baiquan Street, Dongxihu District, Wuhan City, Hubei Province	7
114.189	30.7011	400	71	1	Second Expressway of S19 Airport, Panlongcheng Economic Development Zone, Huangpi District, Wuhan City, Hubei Province	6
114.189	30.7101	987	141	1	Huanghualao Farm, Panlongcheng Economic Development Zone, Huangpi District, Wuhan City, Hubei Province	7
114.189	30.7191	2599	321	5	Zhifang Public Street, Panlongcheng Economic Development Zone, Huangpi District, Wuhan City, Hubei Province	7
114.189	30.728	936	133	0	East-West Lake Dike in Panlongcheng Economic Development Zone, Huangpi District, Wuhan City, Hubei Province	6
[truncated: 5,682 more rows]
